# Supplementary material for: Streptothricin F is a bactericidal antibiotic effective against highly drug-resistant gram-negative bacteria that interacts with the 30S subunit of the 70S ribosome
Source: PubMed Central journal article supplement (PMC10187937; doi:10.1371/journal.pbio.3002091), 2023-05-16
Supplement: pbio.3002091.s003.pdf [file pbio.3002091.s003.pdf]

**S1 Table. <sup>1</sup>H NMR signals of Streptothricin F and Streptothricin D.**

| Position          | Isolated S-F, 600 MHz |      |           | Isolated S-D, 600 MHz |      |           |
|-------------------|-----------------------|------|-----------|-----------------------|------|-----------|
|                   | $\delta$ H (ppm)      | mult | J (Hz)    | $\delta$ H (ppm)      | mult | J (Hz)    |
| H-2               | 4.63                  | d    | 13        | 4.65                  | d    | 13.2      |
| H-3               | 4.08                  | d    | 14.3      | 4.13-4.04             | m    | -         |
| H-4               | 4.73                  | m    | -         | 4.78-4.74             | m    | -         |
| H-5 <sub>a</sub>  | 3.81                  | dd   | 5.7, 14.7 | 3.83                  | dd   | 5.7, 14.7 |
| H-5 <sub>b</sub>  | 3.39                  | d    | 14.6      | 3.42                  | d    | 14.7      |
| H-7               | 5.11                  | d    | 9.8       | 5.14                  | d    | 9.8       |
| H-8               | 4.24                  | dd   | 2.8, 9.8  | 4.26                  | dd   | 3.0, 9.9  |
| H-9               | 4.17                  | t    | 3.3       | 4.18                  | t    | 3.4       |
| H-10              | 4.76                  | m    | -         | 4.78-4.74             | m    | -         |
| H-11              | 4.33                  | t    | 6.1       | 4.35                  | t    | 6.2       |
| H-12 <sub>a</sub> | 3.75-3.64             | m    | -         | 3.78-3.61             | m    | -         |
| H-12 <sub>b</sub> | 3.75-3.64             | m    | -         | 3.78-3.61             | m    | -         |
| H-15 <sub>a</sub> | 2.81                  | dd   | 4.3, 16.7 | 2.83-2.62             | m    | -         |
| H-15 <sub>b</sub> | 2.7                   | dd   | 8.3, 16.6 | 2.83-2.62             | m    | -         |
| H-16              | 3.75-3.64             | m    | -         | 3.78-3.61             | m    | -         |
| H-17              | 1.8                   | m    | -         | 1.86-1.58             | m    | -         |
| H-18              | 1.8                   | m    | -         | 1.86-1.58             | m    | -         |
| H-19              | 3.04                  | t    | 6.8       | 3.25                  | t    | 7.1       |
| H-21 <sub>a</sub> | -                     | -    | -         | 2.83-2.62             | m    | -         |
| H-21 <sub>b</sub> | -                     | -    | -         | 2.83-2.62             | m    | -         |
| H-22              | -                     | -    | -         | 3.78-3.61             | m    | -         |
| H-23              | -                     | -    | -         | 1.86-1.58             | m    | -         |
| H-24              | -                     | -    | -         | 1.86-1.58             | m    | -         |
| H-25              | -                     | -    | -         | 3.25                  | t    | 7.1       |
| H-27 <sub>a</sub> | -                     | -    | -         | 2.83-2.62             | m    | -         |
| H-27 <sub>b</sub> | -                     | -    | -         | 2.83-2.62             | m    | -         |
| H-28              | -                     | -    | -         | 3.78-3.61             | m    | -         |
| H-29              | -                     | -    | -         | 1.86-1.58             | m    | -         |
| H-30              | -                     | -    | -         | 1.86-1.58             | m    | -         |
| H-31              | -                     | -    | -         | 3.07                  | t    | 6.8       |
