# Supplementary material for: Streptothricin F is a bactericidal antibiotic effective against highly drug-resistant gram-negative bacteria that interacts with the 30S subunit of the 70S ribosome
Source: PubMed Central journal article supplement (PMC10187937; doi:10.1371/journal.pbio.3002091), 2023-05-16
Supplement: pbio.3002091.s004.pdf [file pbio.3002091.s004.pdf]

**S2 Table. <sup>13</sup>C NMR signals of Streptothricin F and Streptothricin D.**

| Position | Isolated Streptothricin F, 600 MHz<br>$\delta$ (ppm) | Isolated Streptothricin D, 600 MHz<br>$\delta$ H (ppm) |
|----------|------------------------------------------------------|--------------------------------------------------------|
| 1        | 172.5                                                | 172.62                                                 |
| 2        | 56.82                                                | 56.98 (broad)                                          |
| 3        | 63.25                                                | 63.42                                                  |
| 4        | 62.72                                                | 63.42                                                  |
| 5        | 51.59                                                | 51.79                                                  |
| 6        | 165.14                                               | 165.27                                                 |
| 7        | 81.07                                                | 81.33                                                  |
| 8        | 51.46                                                | 51.60                                                  |
| 9        | 68.89                                                | 69.12                                                  |
| 10       | 72.43                                                | 72.62                                                  |
| 11       | 75.99                                                | 76.15                                                  |
| 12       | 62.62                                                | 62.90                                                  |
| 13       | 160.33                                               | 160.50                                                 |
| 14       | 174.51                                               | 174.80                                                 |
| 15       | 38.73                                                | 39.22                                                  |
| 16       | 50.65                                                | 51.06                                                  |
| 17       | 31.43                                                | 32.03                                                  |
| 18       | 25.25                                                | 26.82                                                  |
| 19       | 41.35                                                | 41.38                                                  |
| 20       | -                                                    | 174.51                                                 |
| 21       | -                                                    | 39.38                                                  |
| 22       | -                                                    | 51.05                                                  |
| 23       | -                                                    | 31.99                                                  |
| 24       | -                                                    | 26.78                                                  |
| 25       | -                                                    | 41.38                                                  |
| 26       | -                                                    | 174.35                                                 |
| 27       | -                                                    | 39.61                                                  |
| 28       | -                                                    | 51.27                                                  |
| 29       | -                                                    | 31.62                                                  |
| 30       | -                                                    | 25.42                                                  |
| 31       | -                                                    | 41.54                                                  |
