# Supplementary material for: Streptothricin F is a bactericidal antibiotic effective against highly drug-resistant gram-negative bacteria that interacts with the 30S subunit of the 70S ribosome
Source: PubMed Central journal article supplement (PMC10187937; doi:10.1371/journal.pbio.3002091), 2023-05-16
Supplement: pbio.3002091.s005.pdf [file pbio.3002091.s005.pdf]

**S3 Table. Streptothricin MIC data for individual CRE and *A. baumannii* strains.**

| Collection | Number | Genus               | Species           | Resistance Element <sup>a</sup> | S-D MIC (μM) | S-F MIC (μM) | Nour MIC (μM) |
|------------|--------|---------------------|-------------------|---------------------------------|--------------|--------------|---------------|
| BIDMC      | 1      | <i>Klebsiella</i>   | <i>pneumoniae</i> | KPC-3                           | 0.25         | 2            | 0.5           |
| BIDMC      | 2      | <i>Klebsiella</i>   | <i>pneumoniae</i> | KPC-3                           | 0.25         | 4            | 0.5           |
| BIDMC      | 3      | <i>Escherichia</i>  | <i>coli</i>       | KPC-2                           | 0.5          | 4            | 0.5           |
| FDA-CDC    | 34     | <i>Klebsiella</i>   | <i>pneumoniae</i> | IMP-4                           | 0.25         | 2            | 0.25          |
| FDA-CDC    | 117    | <i>Klebsiella</i>   | <i>pneumoniae</i> | KPC-3                           | 0.25         | 1            | 0.25          |
| FDA-CDC    | 118    | <i>Escherichia</i>  | <i>coli</i>       | NDM                             | 1            | 4            | 2             |
| FDA-CDC    | 119    | <i>Escherichia</i>  | <i>coli</i>       | NDM                             | 0.5          | 4            | 1             |
| FDA-CDC    | 128    | <i>Escherichia</i>  | <i>coli</i>       | NDM-1                           | 1            | 4            | 1             |
| FDA-CDC    | 161    | <i>Enterobacter</i> | <i>aerogenes</i>  | IMP-4                           | 0.5          | 2            | 1             |
| CDC        | 636    | <i>Klebsiella</i>   | <i>pneumoniae</i> | NDM                             | 0.25         | 1            | 0.25          |
| BIDMC      | 4      | <i>Klebsiella</i>   | <i>pneumoniae</i> | KPC-3                           | 0.25         | 2            | 0.25          |
| BIDMC      | 5      | <i>Klebsiella</i>   | <i>pneumoniae</i> | KPC-3                           | 0.25         | 2            | 0.25          |
| BIDMC      | 6      | <i>Escherichia</i>  | <i>coli</i>       | KPC-2                           | 0.5          | 2            | 0.5           |
| BIDMC      | 7      | <i>Klebsiella</i>   | <i>pneumoniae</i> | KPC-3                           | 0.25         | 2            | 0.5           |
| BIDMC      | 8      | <i>Enterobacter</i> | <i>cloacae</i>    | KPC-3                           | 0.25         | 4            | 0.5           |
| BIDMC      | 9      | <i>Escherichia</i>  | <i>coli</i>       | KPC-2                           | 0.5          | 4            | 0.5           |
| BIDMC      | 10     | <i>Klebsiella</i>   | <i>pneumoniae</i> | KPC-3                           | 0.25         | 2            | 0.5           |
| BIDMC      | 11     | <i>Klebsiella</i>   | <i>pneumoniae</i> | KPC-4                           | 0.25         | 2            | 0.25          |
| BIDMC      | 12     | <i>Klebsiella</i>   | <i>pneumoniae</i> | KPC-3                           | 0.5          | 2            | 0.5           |
| BIDMC      | 13     | <i>Klebsiella</i>   | <i>pneumoniae</i> | KPC-3                           | 0.25         | 2            | 0.5           |
| BIDMC      | 14     | <i>Klebsiella</i>   | <i>pneumoniae</i> | KPC-3                           | 0.5          | 2            | 0.5           |
| BIDMC      | 15     | <i>Escherichia</i>  | <i>coli</i>       | KPC-2                           | 0.5          | 2            | 0.5           |
| BIDMC      | 16     | <i>Klebsiella</i>   | <i>pneumoniae</i> | KPC-3                           | 0.25         | 2            | 0.5           |
| BIDMC      | 17     | <i>Escherichia</i>  | <i>coli</i>       | KPC-2                           | 0.5          | 2            | 0.5           |
| BIDMC      | 18     | <i>Klebsiella</i>   | <i>pneumoniae</i> | KPC-2                           | 2            | 4            | 2             |
| FDA-CDC    | 135    | <i>Klebsiella</i>   | <i>pneumoniae</i> | VIM                             | 0.5          | 2            | 0.5           |
| FDA-CDC    | 136    | <i>Enterobacter</i> | <i>cloacae</i>    | KPC                             | 0.5          | 2            | 0.5           |
| FDA-CDC    | 137    | <i>Escherichia</i>  | <i>coli</i>       | NDM-6                           | 0.5          | 2            | 1             |
| FDA-CDC    | 138    | <i>Klebsiella</i>   | <i>pneumoniae</i> | NDM                             | 0.25         | 1            | 0.25          |
| FDA-CDC    | 139    | <i>Klebsiella</i>   | <i>pneumoniae</i> | NDM-1                           | 0.25         | 2            | 0.5           |
| FDA-CDC    | 140    | <i>Klebsiella</i>   | <i>pneumoniae</i> | OXA-181                         | 0.25         | 2            | 0.5           |
| FDA-CDC    | 141    | <i>Klebsiella</i>   | <i>pneumoniae</i> | OXA-181                         | 0.5          | 4            | 0.5           |

|         |      |                      |                   |         |      |    |      |
|---------|------|----------------------|-------------------|---------|------|----|------|
| FDA-CDC | 142  | <i>Klebsiella</i>    | <i>pneumoniae</i> | OXA-181 | 0.25 | 2  | 0.25 |
| FDA-CDC | 143  | <i>Klebsiella</i>    | <i>pneumoniae</i> | NDM-1   | 0.25 | 2  | 0.5  |
| FDA-CDC | 145  | <i>Klebsiella</i>    | <i>pneumoniae</i> | NDM     | 0.5  | 2  | 0.5  |
| FDA-CDC | 147  | <i>Klebsiella</i>    | <i>oxytoca</i>    | KPC     | 0.25 | 2  | 0.5  |
| FDA-CDC | 148  | <i>Klebsiella</i>    | <i>pneumoniae</i> | NDM     | 0.25 | 2  | 0.5  |
| FDA-CDC | 149  | <i>Escherichia</i>   | <i>coli</i>       | NDM     | 0.5  | 4  | 0.5  |
| FDA-CDC | 150  | <i>Escherichia</i>   | <i>coli</i>       | NDM-5   | 0.5  | 2  | 0.5  |
| FDA-CDC | 308  | <i>Acinetobacter</i> | <i>baumannii</i>  | OXA-71  | 0.25 | 1  | 0.25 |
| FDA-CDC | 309  | <i>Acinetobacter</i> | <i>baumannii</i>  | OXA-23  | 2    | 8  | 2    |
|         |      |                      |                   | OXA-82  |      |    |      |
| FDA-CDC | 310  | <i>Acinetobacter</i> | <i>baumannii</i>  | OXA-23  | 2    | 8  | 2    |
|         |      |                      |                   | OXA-82  |      |    |      |
| FDA-CDC | 311  | <i>Acinetobacter</i> | <i>baumannii</i>  | OXA-23  | 2    | 8  | 2    |
|         |      |                      |                   | OXA-82  |      |    |      |
| FDA-CDC | 33   | <i>Acinetobacter</i> | <i>baumannii</i>  |         | nt   | nt | 0.5  |
| FDA-CDC | 35   | <i>Acinetobacter</i> | <i>baumannii</i>  |         | nt   | nt | 8    |
| FDA-CDC | 36   | <i>Acinetobacter</i> | <i>baumannii</i>  |         | nt   | nt | 16   |
| FDA-CDC | 37   | <i>Acinetobacter</i> | <i>baumannii</i>  |         | nt   | nt | 0.5  |
| FDA-CDC | 45   | <i>Acinetobacter</i> | <i>baumannii</i>  |         | nt   | nt | 2    |
| FDA-CDC | 52   | <i>Acinetobacter</i> | <i>baumannii</i>  |         | nt   | nt | 0.5  |
| FDA-CDC | 56   | <i>Acinetobacter</i> | <i>baumannii</i>  |         | nt   | nt | 2    |
| FDA-CDC | 63   | <i>Acinetobacter</i> | <i>baumannii</i>  |         | nt   | nt | 2    |
| FDA-CDC | 70   | <i>Acinetobacter</i> | <i>baumannii</i>  |         | nt   | nt | 0.5  |
| FDA-CDC | 78   | <i>Acinetobacter</i> | <i>baumannii</i>  |         | nt   | nt | 4    |
| FDA-CDC | 83   | <i>Acinetobacter</i> | <i>baumannii</i>  |         | nt   | nt | 4    |
| FDA-CDC | 88   | <i>Acinetobacter</i> | <i>baumannii</i>  |         | nt   | nt | 2    |
| FDA-CDC | 101  | <i>Acinetobacter</i> | <i>baumannii</i>  |         | nt   | nt | 8    |
| FDA-CDC | 102  | <i>Acinetobacter</i> | <i>baumannii</i>  |         | nt   | nt | 2    |
| FDA-CDC | 0273 | <i>Acinetobacter</i> | <i>baumannii</i>  | CRAB    | nt   | nt | 2    |
| FDA-CDC | 0274 | <i>Acinetobacter</i> | <i>baumannii</i>  | CRAB    | nt   | nt | 16   |
| FDA-CDC | 0275 | <i>Acinetobacter</i> | <i>baumannii</i>  | CRAB    | nt   | nt | 2    |
| FDA-CDC | 0276 | <i>Acinetobacter</i> | <i>baumannii</i>  | CRAB    | nt   | nt | 64   |
| FDA-CDC | 0277 | <i>Acinetobacter</i> | <i>baumannii</i>  | CRAB    | nt   | nt | 8    |
| FDA-CDC | 0278 | <i>Acinetobacter</i> | <i>baumannii</i>  | CRAB    | nt   | nt | 4    |
| FDA-CDC | 0279 | <i>Acinetobacter</i> | <i>baumannii</i>  | CRAB    | nt   | nt | 4    |
| FDA-CDC | 0280 | <i>Acinetobacter</i> | <i>baumannii</i>  | CRAB    | nt   | nt | 4    |

|         |       |                      |                  |      |    |    |        |
|---------|-------|----------------------|------------------|------|----|----|--------|
| FDA-CDC | 0281  | <i>Acinetobacter</i> | <i>baumannii</i> | CRAB | nt | nt | 4      |
| FDA-CDC | 0282  | <i>Acinetobacter</i> | <i>baumannii</i> | CRAB | nt | nt | 4      |
| FDA-CDC | 0283  | <i>Acinetobacter</i> | <i>baumannii</i> | CRAB | nt | nt | 4      |
| FDA-CDC | 0284  | <i>Acinetobacter</i> | <i>baumannii</i> | CRAB | nt | nt | 8      |
| FDA-CDC | 0285  | <i>Acinetobacter</i> | <i>baumannii</i> | CRAB | nt | nt | 4      |
| FDA-CDC | 0286  | <i>Acinetobacter</i> | <i>baumannii</i> | CRAB | nt | nt | 8      |
| FDA-CDC | 0287  | <i>Acinetobacter</i> | <i>baumannii</i> | CRAB | nt | nt | 2      |
| FDA-CDC | 0288  | <i>Acinetobacter</i> | <i>baumannii</i> | CRAB | nt | nt | 2      |
| FDA-CDC | 0289  | <i>Acinetobacter</i> | <i>baumannii</i> | CRAB | nt | nt | 2      |
| FDA-CDC | 0290  | <i>Acinetobacter</i> | <i>baumannii</i> | CRAB | nt | nt | 4      |
| FDA-CDC | 0291  | <i>Acinetobacter</i> | <i>baumannii</i> | CRAB | nt | nt | 2      |
| FDA-CDC | 0292  | <i>Acinetobacter</i> | <i>baumannii</i> | CRAB | nt | nt | 2      |
| FDA-CDC | 0293  | <i>Acinetobacter</i> | <i>baumannii</i> | CRAB | nt | nt | 2      |
| FDA-CDC | 0294  | <i>Acinetobacter</i> | <i>baumannii</i> | CRAB | nt | nt | 2      |
| FDA-CDC | 0295  | <i>Acinetobacter</i> | <i>baumannii</i> | CRAB | nt | nt | 4      |
| FDA-CDC | 0296  | <i>Acinetobacter</i> | <i>baumannii</i> | CRAB | nt | nt | 4      |
| FDA-CDC | 0297  | <i>Acinetobacter</i> | <i>baumannii</i> | CRAB | nt | nt | 32     |
| FDA-CDC | 0298  | <i>Acinetobacter</i> | <i>baumannii</i> | CRAB | nt | nt | 2      |
| FDA-CDC | 0299  | <i>Acinetobacter</i> | <i>baumannii</i> | CRAB | nt | nt | 8      |
| FDA-CDC | 0300  | <i>Acinetobacter</i> | <i>baumannii</i> | CRAB | nt | nt | 4      |
| FDA-CDC | 0301  | <i>Acinetobacter</i> | <i>baumannii</i> | CRAB | nt | nt | 8      |
| FDA-CDC | 0302  | <i>Acinetobacter</i> | <i>baumannii</i> | CRAB | nt | nt | 4      |
| FDA-CDC | 0303  | <i>Acinetobacter</i> | <i>baumannii</i> | CRAB | nt | nt | 2      |
| FDA-CDC | 0304  | <i>Acinetobacter</i> | <i>baumannii</i> | CRAB | nt | nt | 4      |
| FDA-CDC | 0305  | <i>Acinetobacter</i> | <i>baumannii</i> | CRAB | nt | nt | 8      |
| FDA-CDC | 0306  | <i>Acinetobacter</i> | <i>baumannii</i> | CRAB | nt | nt | 8      |
| FDA-CDC | 0307  | <i>Acinetobacter</i> | <i>baumannii</i> | CRAB | nt | nt | 4      |
| FDA-CDC | 312   | <i>Acinetobacter</i> | <i>baumannii</i> | CRAB | nt | nt | 1      |
| MRSN    | 7117  | <i>Acinetobacter</i> | <i>baumannii</i> |      | nt | nt | 2      |
| MRSN    | 7322  | <i>Acinetobacter</i> | <i>baumannii</i> |      | nt | nt | 2      |
| MRSN    | 7436  | <i>Acinetobacter</i> | <i>baumannii</i> |      | nt | nt | 4      |
| MRSN    | 7465  | <i>Acinetobacter</i> | <i>baumannii</i> |      | nt | nt | 0.25   |
| MRSN    | 7520  | <i>Acinetobacter</i> | <i>baumannii</i> |      | nt | nt | 0.5    |
| MRSN    | 11684 | <i>Acinetobacter</i> | <i>baumannii</i> |      | nt | nt | 2      |
| MRSN    | 11712 | <i>Acinetobacter</i> | <i>baumannii</i> |      | nt | nt | 0.5    |
| MRSN    | 11751 | <i>Acinetobacter</i> | <i>baumannii</i> |      | nt | nt | 0.25   |
| MRSN    | 15038 | <i>Acinetobacter</i> | <i>baumannii</i> |      | nt | nt | <0.125 |
| MRSN    | 15067 | <i>Acinetobacter</i> | <i>baumannii</i> |      | nt | nt | 0.25   |
| MRSN    | 55    | <i>Acinetobacter</i> | <i>baumannii</i> | CRAB | nt | nt | 0.25   |

|      |       |                      |                  |      |    |    |      |
|------|-------|----------------------|------------------|------|----|----|------|
| MRSN | 846   | <i>Acinetobacter</i> | <i>baumannii</i> | CRAB | nt | nt | 0.5  |
| MRSN | 847   | <i>Acinetobacter</i> | <i>baumannii</i> | CRAB | nt | nt | 0.5  |
| MRSN | 865   | <i>Acinetobacter</i> | <i>baumannii</i> | CRAB | nt | nt | 2    |
| MRSN | 881   | <i>Acinetobacter</i> | <i>baumannii</i> | CRAB | nt | nt | 0.5  |
| MRSN | 890   | <i>Acinetobacter</i> | <i>baumannii</i> | CRAB | nt | nt | 0.25 |
| MRSN | 899   | <i>Acinetobacter</i> | <i>baumannii</i> | CRAB | nt | nt | 1    |
| MRSN | 915   | <i>Acinetobacter</i> | <i>baumannii</i> | CRAB | nt | nt | 0.5  |
| MRSN | 1424  | <i>Acinetobacter</i> | <i>baumannii</i> | CRAB | nt | nt | 2    |
| MRSN | 1450  | <i>Acinetobacter</i> | <i>baumannii</i> | CRAB | nt | nt | 2    |
| MRSN | 1625  | <i>Acinetobacter</i> | <i>baumannii</i> | CRAB | nt | nt | 4    |
| MRSN | 2001  | <i>Acinetobacter</i> | <i>baumannii</i> | CRAB | nt | nt | 1    |
| MRSN | 2356  | <i>Acinetobacter</i> | <i>baumannii</i> | CRAB | nt | nt | 0.25 |
| MRSN | 2400  | <i>Acinetobacter</i> | <i>baumannii</i> | CRAB | nt | nt | 8    |
| MRSN | 2402  | <i>Acinetobacter</i> | <i>baumannii</i> | CRAB | nt | nt | 1    |
| MRSN | 3360  | <i>Acinetobacter</i> | <i>baumannii</i> | CRAB | nt | nt | 2    |
| MRSN | 3384  | <i>Acinetobacter</i> | <i>baumannii</i> | CRAB | nt | nt | 2    |
| MRSN | 3607  | <i>Acinetobacter</i> | <i>baumannii</i> | CRAB | nt | nt | 2    |
| MRSN | 3716  | <i>Acinetobacter</i> | <i>baumannii</i> | CRAB | nt | nt | 4    |
| MRSN | 7271  | <i>Acinetobacter</i> | <i>baumannii</i> | CRAB | nt | nt | 2    |
| MRSN | 7339  | <i>Acinetobacter</i> | <i>baumannii</i> | CRAB | nt | nt | 4    |
| MRSN | 7401  | <i>Acinetobacter</i> | <i>baumannii</i> | CRAB | nt | nt | 0.5  |
| MRSN | 7493  | <i>Acinetobacter</i> | <i>baumannii</i> | CRAB | nt | nt | 4    |
| MRSN | 11656 | <i>Acinetobacter</i> | <i>baumannii</i> | CRAB | nt | nt | 2    |
| MRSN | 11663 | <i>Acinetobacter</i> | <i>baumannii</i> | CRAB | nt | nt | 2    |
| MRSN | 11672 | <i>Acinetobacter</i> | <i>baumannii</i> | CRAB | nt | nt | 4    |
| MRSN | 11681 | <i>Acinetobacter</i> | <i>baumannii</i> | CRAB | nt | nt | 32   |
| MRSN | 11693 | <i>Acinetobacter</i> | <i>baumannii</i> | CRAB | nt | nt | 32   |
| MRSN | 11755 | <i>Acinetobacter</i> | <i>baumannii</i> | CRAB | nt | nt | 32   |
| MRSN | 11777 | <i>Acinetobacter</i> | <i>baumannii</i> | CRAB | nt | nt | 32   |
| MRSN | 13300 | <i>Acinetobacter</i> | <i>baumannii</i> | CRAB | nt | nt | 32   |
| MRSN | 15081 | <i>Acinetobacter</i> | <i>baumannii</i> | CRAB | nt | nt | 32   |
| MRSN | 17480 | <i>Acinetobacter</i> | <i>baumannii</i> | CRAB | nt | nt | 32   |
| MRSN | 17990 | <i>Acinetobacter</i> | <i>baumannii</i> | CRAB | nt | nt | 32   |
| MRSN | 19209 | <i>Acinetobacter</i> | <i>baumannii</i> | CRAB | nt | nt | 32   |
| MRSN | 22623 | <i>Acinetobacter</i> | <i>baumannii</i> | CRAB | nt | nt | 4    |
| MRSN | 23016 | <i>Acinetobacter</i> | <i>baumannii</i> | CRAB | nt | nt | 1    |
| MRSN | 24384 | <i>Acinetobacter</i> | <i>baumannii</i> | CRAB | nt | nt | 2    |
| MRSN | 28691 | <i>Acinetobacter</i> | <i>baumannii</i> | CRAB | nt | nt | 0.5  |
| MRSN | 30728 | <i>Acinetobacter</i> | <i>baumannii</i> | CRAB | nt | nt | 1    |

<sup>a</sup>β-lactamase presumptively associated with carbapenem resistance phenotype.

Nour = nourseothricin; BIDMC = Beth Israel Deaconess Medical Center; FDA-CDC = Antimicrobial Resistance Isolate Bank Collection; MSRN=Multidrug Resistant Organism Repository and Surveillance Network (MRSN) at the Walter Reed Army Institute of Research; CRAB = carbapenem-resistant *A. baumannii*; nt = not tested
