# Supplementary material for: Streptothricin F is a bactericidal antibiotic effective against highly drug-resistant gram-negative bacteria that interacts with the 30S subunit of the 70S ribosome
Source: PubMed Central journal article supplement (PMC10187937; doi:10.1371/journal.pbio.3002091), 2023-05-16
Supplement: pbio.3002091.s006.pdf [file pbio.3002091.s006.pdf]

**S4 Table. The ratio of S-F to S-D minimal inhibitory concentration in *tolC* and *lptD* strain background was not significantly changed.**

| experiment 1  | wt  | <i>tolC</i> | <i>lptD</i> |
|---------------|-----|-------------|-------------|
| S-F           | 2   | 2           | 1           |
| S-D           | 0.5 | 0.25        | 0.125       |
| S-F:S-D ratio | 4   | 8           | 8           |

| experiment 2  | wt  | <i>tolC</i> | <i>lptD</i> |
|---------------|-----|-------------|-------------|
| S-F           | 4   | 2           | 0.5         |
| S-D           | 0.5 | 0.25        | 0.0625      |
| S-F:S-D ratio | 8   | 8           | 8           |

Modal MIC in  $\mu\text{M}$  values for three (experiment 1) or four technical replicates (experiment 2). The similarity of ratios between S-F and S-D suggested that there was not a significant difference in either efflux (*tolC*) or permeability (*lptD*) between these two streptothricins by these measures. Abbreviations: **wt** = *E. coli* strain BW25113 from the Coli Genetics Stock Center (CGSC, Yale University) # 7636; ***tolC*** = *E. coli* strain JW5503-KanS, CGSC # 14206; ***lptD*** = *E. coli* strain RFM795, CGSC # 14179.
