# Supplementary material for: Streptothricin F is a bactericidal antibiotic effective against highly drug-resistant gram-negative bacteria that interacts with the 30S subunit of the 70S ribosome
Source: PubMed Central journal article supplement (PMC10187937; doi:10.1371/journal.pbio.3002091), 2023-05-16
Supplement: pbio.3002091.s008.pdf [file pbio.3002091.s008.pdf]

**S6 Table. Effect of TetM on nourseothricin minimal inhibitory concentration in *Staphylococcus aureus* isolates.**

|                       | strains    |        |        |
|-----------------------|------------|--------|--------|
|                       | ATCC 25923 | AR-219 | AR-221 |
| <b>TetM</b>           | -          | +      | +      |
| <b>nourseothricin</b> | 0.5        | 1      | 1      |
| <b>tetracycline</b>   | 0.5        | 32     | 64     |

Minimal inhibitory concentrations in  $\mu\text{g/mL}$  represent the modal value for three biological replicates. The presence (+) or absence (-) of the TetM ribosomal protection protein gene are as indicated. No other specific tetracycline resistance elements were identified in AR-219 (Genbank ID: CP029675.1, CP029674.1), AR-221 (Genbank ID: NZ\_QHCN01000001.1, NZ\_QHCN01000002.1, NZ\_QHCN01000003.1), and ATCC 25923 (Genbank ID: NZ\_CP009361) in a CARD resistance gene identifier (RGI 5.2.0, CARD 3.1.2) search (1) performed May 24, 2021 using perfect and strict hit settings.

## Reference

1. Alcock BP, *et al.* (2020) CARD 2020: antibiotic resistome surveillance with the comprehensive antibiotic resistance database. *Nucleic Acids Res* 48(D1):D517-d525.
