# Supplementary material for: Streptothricin F is a bactericidal antibiotic effective against highly drug-resistant gram-negative bacteria that interacts with the 30S subunit of the 70S ribosome
Source: PubMed Central journal article supplement (PMC10187937; doi:10.1371/journal.pbio.3002091), 2023-05-16
Supplement: pbio.3002091.s009.pdf [file pbio.3002091.s009.pdf]

**S7 Table. Ribosome-S-F cryo-EM data collection and refinement statistics.**

| <b>Data collection</b>                          |                        |                        |                  |
|-------------------------------------------------|------------------------|------------------------|------------------|
| Magnification                                   | 105,000                |                        |                  |
| Voltage (kV)                                    | 300                    |                        |                  |
| Electron Microscope                             | Krios-GIF-K3           |                        |                  |
| Defocus (um)                                    | -1.0 to -2.5           |                        |                  |
| Energy filter width (eV)                        | 20                     |                        |                  |
| Pixel size (Å) <sup>a</sup>                     | 0.848 (0.424)          |                        |                  |
| Total dose (e <sup>-</sup> / Å <sup>2</sup> )   | 46                     |                        |                  |
| Number of frames                                | 40                     |                        |                  |
| Number of micrographs                           | 3,054                  |                        |                  |
| Initial particle images (no.)                   | 648,714                |                        |                  |
| Final particle images (no.)                     | 430,291                |                        |                  |
| <b>Refinement</b>                               | <b>70S P-site-tRNA</b> | <b>70S E-site-tRNA</b> | <b>70S Empty</b> |
| Total Particles (no.)                           | 53,114                 | 109,944                | 135,858          |
| <u>GS-FSC Resolution (0.143, Å)<sup>b</sup></u> |                        |                        |                  |
| 50S                                             | 2.50                   | 2.37                   | 2.35             |
| 30S Core                                        | 2.72                   | 2.59                   | 2.55             |
| 30S Head                                        | 2.66                   | 2.52                   | 2.57             |
| <u>Model composition</u>                        |                        |                        |                  |
| Chains                                          | 53                     | 53                     | 51               |
| Protein residues                                | 5,500                  | 5,512                  | 5,510            |
| Nucleotides                                     | 4,447                  | 4,442                  | 4,358            |
| Streptothricin-F                                | 2                      | 0                      | 1                |
| <u>r.m.s.d.</u>                                 |                        |                        |                  |
| Bond lengths (Å)                                | 0.004                  | 0.004                  | 0.003            |
| Bond angles (°)                                 | 0.622                  | 0.621                  | 0.588            |
| <b>Validation</b>                               | <b>70S P-site-tRNA</b> | <b>70S E-site-tRNA</b> | <b>70S Empty</b> |
| MolProbity score                                | 1.72                   | 1.66                   | 1.64             |
| Clash score                                     | 5.07                   | 4.71                   | 4.45             |
| <u>Ramachandran plot</u>                        |                        |                        |                  |
| Favored (%)                                     | 97.22                  | 97.23                  | 97.47            |
| Allowed (%)                                     | 2.63                   | 2.64                   | 2.33             |
| Disallowed (%)                                  | 0.15                   | 0.13                   | 0.20             |
| CC Mask                                         | 0.91                   | 0.91                   | 0.91             |

<sup>a</sup>Super-resolution stacks processed in 0.75 resolution instead of 0.5 during motion correction

<sup>b</sup>Gold-Standard Fourier Shell Correlation; refinements split into three regions for each structure.
