# Supplementary material for: Streptothricin F is a bactericidal antibiotic effective against highly drug-resistant gram-negative bacteria that interacts with the 30S subunit of the 70S ribosome
Source: PubMed Central journal article supplement (PMC10187937; doi:10.1371/journal.pbio.3002091), 2023-05-16
Supplement: pbio.3002091.s010.pdf [file pbio.3002091.s010.pdf]

**S8 Table. Ribosome-S-D cryo-EM data collection and refinement statistics.**

| <b>Data collection</b>                          |                        |                        |                  |
|-------------------------------------------------|------------------------|------------------------|------------------|
| Magnification                                   | 80,000                 |                        |                  |
| Voltage (kV)                                    | 300                    |                        |                  |
| Electron Microscope                             | Krios-GIF-K3           |                        |                  |
| Defocus (um)                                    | -1.0 to -2.5           |                        |                  |
| Energy filter width (eV)                        | 20                     |                        |                  |
| Pixel size (Å) <sup>a</sup>                     | 1.08 (0.54)            |                        |                  |
| Total dose (e <sup>-</sup> / Å <sup>2</sup> )   | 36                     |                        |                  |
| Number of frames                                | 40                     |                        |                  |
| Number of micrographs                           | 5,245                  |                        |                  |
| Initial particle images (no.)                   | 1,749,230              |                        |                  |
| Final particle images (no.)                     | 1,251,104              |                        |                  |
| <b>Refinement</b>                               | <b>70S P-site-tRNA</b> | <b>70S E-site-tRNA</b> | <b>70S Empty</b> |
| Total Particles (no.)                           | 144,189                | 451,971                | 420,107          |
| <u>GS-FSC Resolution (0.143, Å)<sup>b</sup></u> |                        |                        |                  |
| 50S                                             | 2.39                   | 2.21                   | 2.21             |
| 30S Core                                        | 2.67                   | 2.45                   | 2.47             |
| 30S Head                                        | 2.65                   | 2.52                   | 2.51             |
| <u>Model composition</u>                        |                        |                        |                  |
| Chains                                          | 53                     | 53                     | 51               |
| Protein residues                                | 5,512                  | 5,512                  | 5,510            |
| Nucleotides                                     | 4,447                  | 4,453                  | 4,369            |
| Streptothricin-D                                | 12                     | 11                     | 12               |
| <u>r.m.s.d.</u>                                 |                        |                        |                  |
| Bond lengths (Å)                                | 0.005                  | 0.005                  | 0.004            |
| Bond angles (°)                                 | 0.663                  | 0.615                  | 0.604            |
| <b>Validation</b>                               | <b>70S P-site-tRNA</b> | <b>70S E-site-tRNA</b> | <b>70S Empty</b> |
| MolProbity score                                | 1.69                   | 1.55                   | 1.49             |
| Clash score                                     | 4.90                   | 4.61                   | 4.26             |
| <u>Ramachandran plot</u>                        |                        |                        |                  |
| Favored (%)                                     | 97.25                  | 97.69                  | 97.67            |
| Allowed (%)                                     | 2.55                   | 2.14                   | 2.14             |
| Disallowed (%)                                  | 0.20                   | 0.17                   | 0.18             |
| CC Mask                                         | 0.93                   | 0.93                   | 0.93             |

<sup>a</sup>Super-resolution stacks processed in 0.75 resolution instead of 0.5 during motion correction

<sup>b</sup>Gold-Standard Fourier Shell Correlation; refinements split into three regions for each structure.
