# Supplementary material for: Streptothricin F is a bactericidal antibiotic effective against highly drug-resistant gram-negative bacteria that interacts with the 30S subunit of the 70S ribosome
Source: PubMed Central journal article supplement (PMC10187937; doi:10.1371/journal.pbio.3002091), 2023-05-16
Supplement: pbio.3002091.s011.pdf [file pbio.3002091.s011.pdf]

**S9 Table. Lack of effect of ribosomal 16S rRNA G1405 (ArmA) and A1408 (NpmA) methyltransferases on nourseothricin minimal inhibitory concentration (MIC in µg/mL).**

| Antibiotic     | <i>armA</i> <sup>a</sup> | <i>npmA</i> <sup>a</sup> | vector control <sup>b</sup> |
|----------------|--------------------------|--------------------------|-----------------------------|
| gentamicin     | >256                     | 16                       | 0.125                       |
| apramycin      | 1                        | > 256                    | 1                           |
| nourseothricin | 0.25                     | 0.25                     | 0.5                         |

<sup>a</sup>genes cloned under inducible pBAD promoter (see S5 Fig). 1% arabinose added to MIC panels for induction.

<sup>b</sup>Vector control was the same pBAD vector expressing an unrelated protein (LSSOrange) cloned in the same position as the *armA* and *npmA* methyltransferases, providing a measure of the susceptibility of the strains in the absence of any resistance gene.

MIC values represent mode for at least 8 separate determinations in two biological replicates.
