# Supplementary material for: Streptothricin F is a bactericidal antibiotic effective against highly drug-resistant gram-negative bacteria that interacts with the 30S subunit of the 70S ribosome
Source: PubMed Central journal article supplement (PMC10187937; doi:10.1371/journal.pbio.3002091), 2023-05-16
Supplement: pbio.3002091.s012.pdf [file pbio.3002091.s012.pdf]

**S10 Table. 16s rRNA helix 34 and helix 44 mutations specifically inhibit streptothricin and aminoglycoside activity, respectively.**

|          | <b>Mutation</b> | <b>NAT</b> | <b>S-F</b> | <b>GEN</b> | <b>TOB</b> | <b>KAN</b> | <b>NEO</b> | <b>APR</b> | <b>PARO</b> | <b>RIB</b> |
|----------|-----------------|------------|------------|------------|------------|------------|------------|------------|-------------|------------|
|          | wt              | 1          | 2          | 0.25       | 0.5        | 2          | 0.5        | 16         | 2           | 2          |
| helix 34 | C1054A          | 512        | >512       | 0.25       | 0.25       | 1          | 0.25       | 1          | 0.5         | 1          |
|          | C1054A          | 512        | >512       | 0.25       | 0.25       | 0.5        | 0.25       | 1          | 0.25        | 0.5        |
| helix 44 | A1408G          | 1          | 2          | 64         | 512        | >512       | 512        | >512       | 32          | >512       |
|          | A1408G          | 0.5        | 2          | 32         | 512        | >512       | 512        | >512       | 16          | >512       |
|          | A1408G          | 1          | 2          | 32         | 512        | >512       | 512        | >512       | 16          | >512       |
|          | G1491A          | 0.5        | 1          | 0.5        | 2          | 8          | 1          | 512        | 16          | 128        |
|          | G1491A          | 0.5        | 2          | 0.5        | 2          | 4          | 1          | 512        | 16          | 128        |
|          | G1491A          | 0.5        | 2          | 0.5        | 2          | 8          | 2          | >512       | 32          | 256        |

Minimal inhibitory concentration results for individually isolated aminoglycoside mutants in the single ribosomal operon SQ110 strain (wt) isolated on 128 µg/mL apramycin (helix 44 mutants) or nourseothricin (helix 34 mutants) as described in Materials and Methods. Aminoglycoside MIC values are in µg/mL; streptothricins, in µM. NAT = nourseothricin; S-F = streptothricin F; GEN = gentamicin; TOB = tobramycin; KAN = kanamycin; NEO = neomycin; APR = apramycin; PARO = paromomycin; RIB = ribostamycin.
