# Supplementary material for: Streptothricin F is a bactericidal antibiotic effective against highly drug-resistant gram-negative bacteria that interacts with the 30S subunit of the 70S ribosome
Source: PubMed Central journal article supplement (PMC10187937; doi:10.1371/journal.pbio.3002091), 2023-05-16
Supplement: pbio.3002091.s013.pdf [file pbio.3002091.s013.pdf]

**S11 Table. Primer Sequences.**

| Primer Name  | Sequence                                                             |
|--------------|----------------------------------------------------------------------|
| pBAD_F       | GAATTCGAAGCTTGGCTGT                                                  |
| pBAD_R       | GGTTAATTCCTCCTGTTAGCCC                                               |
| ArmA_F       | GGCTAACAGGAGGAATTAACCATGGA<br>CAAGAATGACGTGGTCAAAAAA                 |
| ArmA_R       | ACAGCCAAGCTTCGAATTCTTACTTTTGGAAGCCCGAAGT                             |
| NpmA_F       | GGCTAACAGGAGGAATTAACCATGCT<br>GATTCTGAAAGGAACTAAAACGG                |
| NpmA_R       | ACAGCCAAGCTTCGAATTCTTAGTGTTTCGATACATGACCGG                           |
| T7Nluc-F     | GACGTTGTAAAACGA                                                      |
| pBAD-tetM_F  | TGTTCAATAAAATAACTTAGgaattcgaagcttgctgtttgg                           |
| pBAD tetM_R  | CCAATATTAATAATTTTCATggtaattcctcctgtagccC                             |
| tetM_F       | gctaacaggaggaattaaccATGAAAATTATTAATATTGGAGTTTTAGCTCAT<br>GTTGATGCAGG |
| tetM_R       | aacagccaagcttgaattcCTAAGTTATTTTATTGAACATATATCTTACTTTA<br>TCTATCCGACT |
| T7Nluc-R     | AGGAAGCCCGGATAT                                                      |
| NLuc_BamHI-F | CGC <u>GGATCC</u> GTCTTCACACTCGAAGAT                                 |
| NLuc_PstI-R  | CGC <u>CTGCAG</u> TTACGCCAGAATGCGTTC                                 |
| F16S+23S     | CACCTCGCGACAGTGCCTAAAGCG                                             |
| R16S+23S     | GGTCAGGTGGGACCACCGCGCTAC                                             |
| 16SR*        | CGCAAGACGCCTTGCTTTTCA                                                |

\*16S rRNA *rrsE* reverse primer from Orelle C, et al. (1).

## Reference

1. Orelle C, *et al.* (2013) Tools for characterizing bacterial protein synthesis inhibitors. *Antimicrob Agents Chemother* 57(12):5994-6004.
