# Supplementary material for: Streptothricin F is a bactericidal antibiotic effective against highly drug-resistant gram-negative bacteria that interacts with the 30S subunit of the 70S ribosome
Source: PubMed Central journal article supplement (PMC10187937; doi:10.1371/journal.pbio.3002091), 2023-05-16
Supplement: pbio.3002091.s015.pdf [file pbio.3002091.s015.pdf]

**S2 Fig. Elemental analysis results of isolated streptothricin D from commercially available nourseothricin sulfate.** The percent compositions align with a molecular formula of  $C_{31}H_{58}N_{12}O_{10} \cdot 5/2 H_2SO_4 \cdot 5 H_2O$ .

| <b>C</b> | <b>H</b> | <b>N</b> | <b>O</b> |
|----------|----------|----------|----------|
| 31.41 %  | 5.49 %   | 15.00 %  | 35.78 %  |
| <b>S</b> |          |          |          |
| 7.06 %   |          |          |          |
