# Supplementary material for: Streptothricin F is a bactericidal antibiotic effective against highly drug-resistant gram-negative bacteria that interacts with the 30S subunit of the 70S ribosome
Source: PubMed Central journal article supplement (PMC10187937; doi:10.1371/journal.pbio.3002091), 2023-05-16
Supplement: pbio.3002091.s016.pdf [file pbio.3002091.s016.pdf]

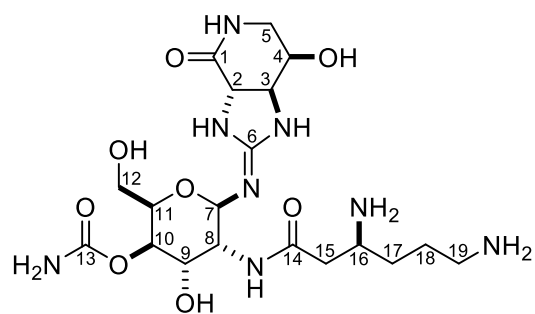

Streptothricin F

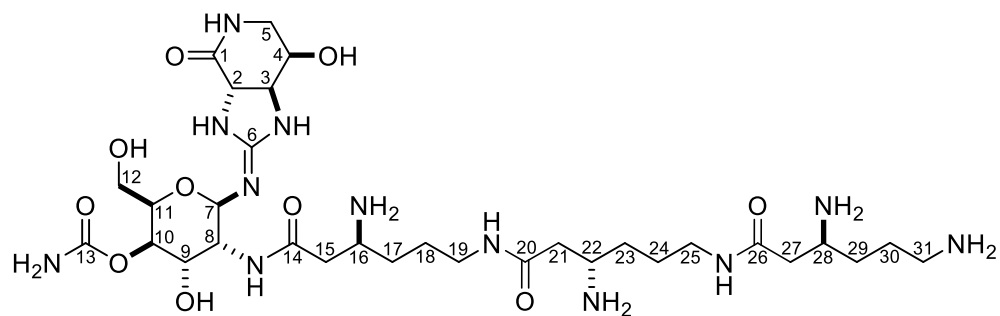

Streptothricin D

**S3 Fig. Assignment of Chemical Shifts.** The numbering scheme for Streptothricin F and Streptothricin D. In the  $^1\text{H}$  NMR, distinct chemical shifts for protons attached to the same carbon atom are labeled  $\text{H}_a$  and  $\text{H}_b$ , respectively.
