# Supplementary material for: Streptothricin F is a bactericidal antibiotic effective against highly drug-resistant gram-negative bacteria that interacts with the 30S subunit of the 70S ribosome
Source: PubMed Central journal article supplement (PMC10187937; doi:10.1371/journal.pbio.3002091), 2023-05-16
Supplement: pbio.3002091.s017.pdf [file pbio.3002091.s017.pdf]

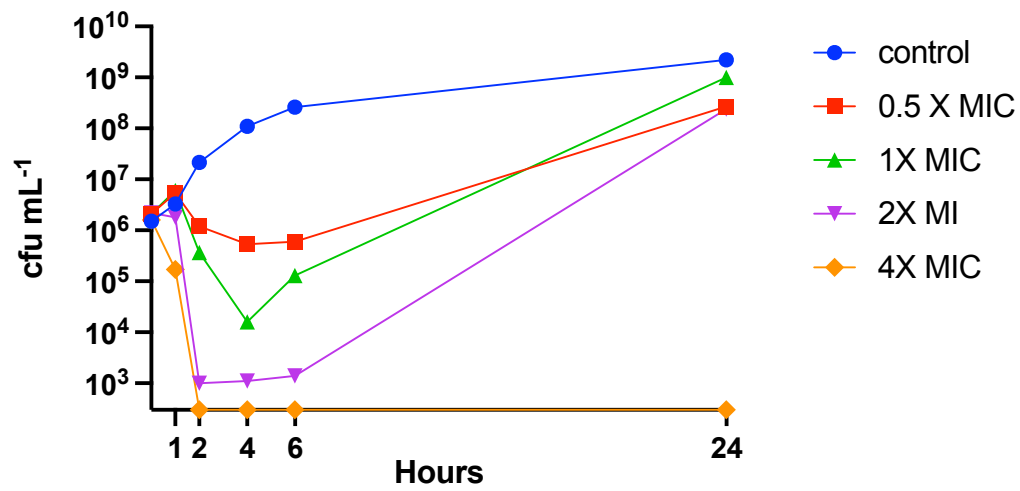

**S4 Fig. Rapid bactericidal activity of nourseothricin against the carbapenem-resistant *Acinetobacter baumannii* isolate, MSRN1450.** Nourseothricin MIC was 2 $\mu$ g/mL. See also S2 Data.
