# Supplementary material for: Streptothricin F is a bactericidal antibiotic effective against highly drug-resistant gram-negative bacteria that interacts with the 30S subunit of the 70S ribosome
Source: PubMed Central journal article supplement (PMC10187937; doi:10.1371/journal.pbio.3002091), 2023-05-16
Supplement: pbio.3002091.s021.pdf [file pbio.3002091.s021.pdf]

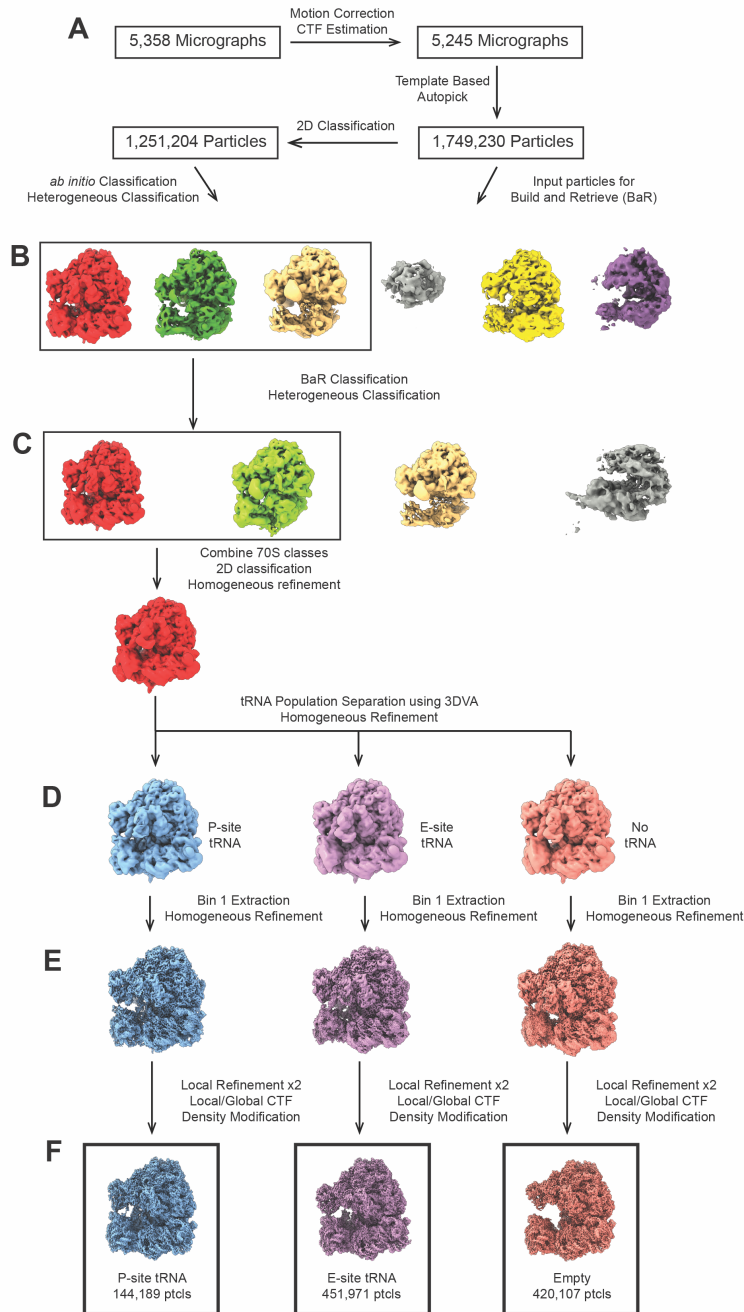

**S8 Fig. S-D Cryo-EM processing workflow.** (A) 5,358 micrographs were processed and classified to give rise to an initial particle pool of 1,251,204 particles. (B) *ab initio* classification gave rise to initial classes. (C) A modified build-and-retrieve (BaR) approach was used to generate the full particle set. Complete 70S classes were combined and refined. (D) Full particle set was separated based off of tRNA population using 3D variability analysis in cryoSPARC. (E) Particles were extracted at full resolution and refined with homogeneous refinement. (F) Final maps refined with local/global CTF correction and focused local refinements and composite maps generated using Relion postprocessing.
