# Supplementary material for: Streptothricin F is a bactericidal antibiotic effective against highly drug-resistant gram-negative bacteria that interacts with the 30S subunit of the 70S ribosome
Source: PubMed Central journal article supplement (PMC10187937; doi:10.1371/journal.pbio.3002091), 2023-05-16
Supplement: pbio.3002091.s023.pdf [file pbio.3002091.s023.pdf]

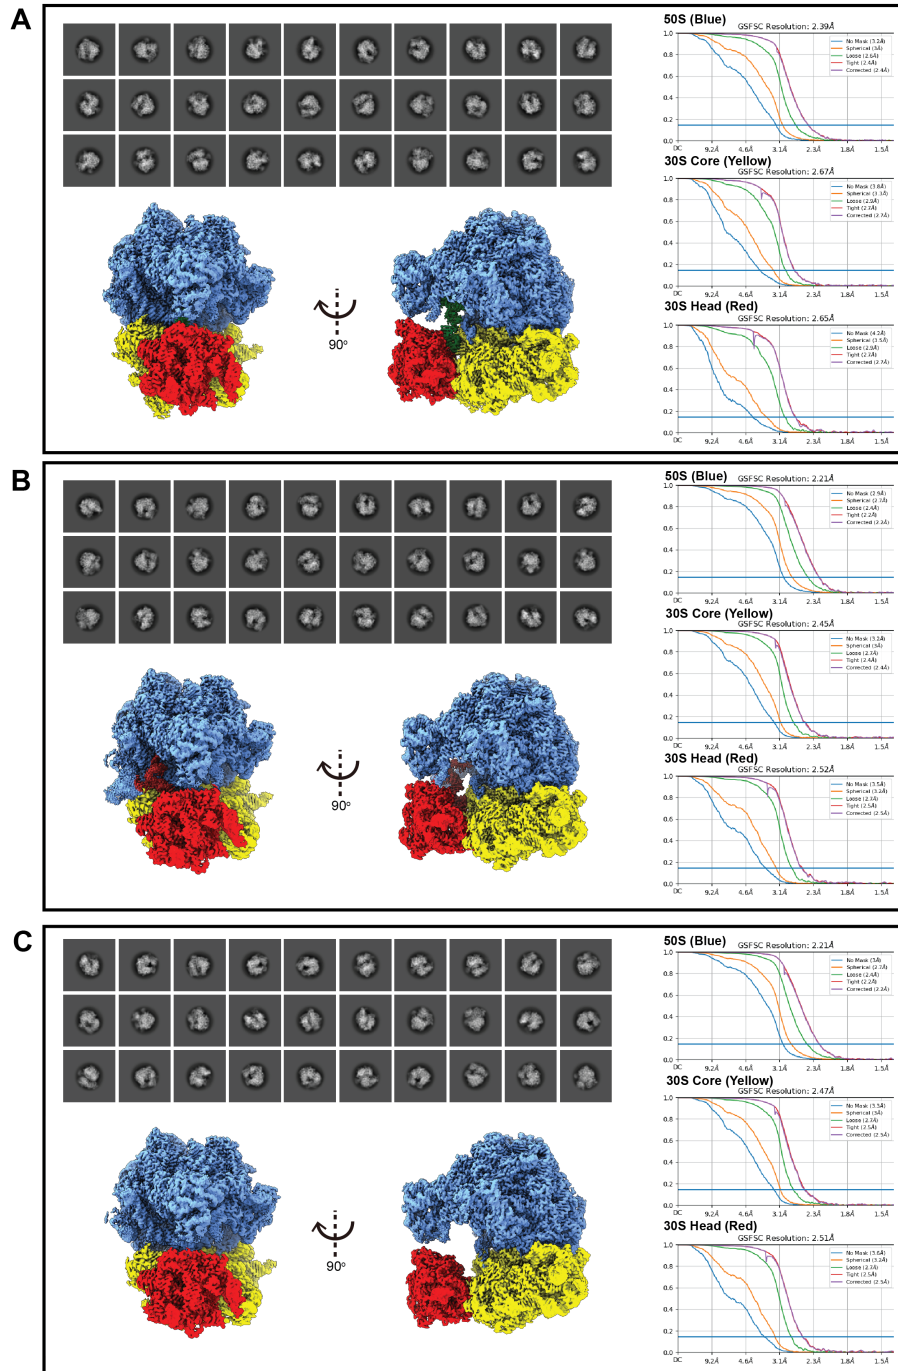

**S10 Fig. Final refined maps of *A. baumannii* 70S – S-D complexes.** (A) 2D classes (top left), Final map (bottom left) and GS-FSC curves of focus-refined regions of the P-site tRNA 70S – S-D complex. (B) 2D classes (top left), Final map (bottom left) and GS-FSC curves of focus-refined regions of the E-site tRNA 70S – S-D complex. (C) 2D classes (top left), Final map (bottom left) and GS-FSC curves of focus-refined regions of the empty 70S – S-D complex. In all figures, maps are color coded by focused refinement (50S = blue, 30S core = yellow and 30S head = red). See also S8 Data.
