# Supplementary material for: Streptothricin F is a bactericidal antibiotic effective against highly drug-resistant gram-negative bacteria that interacts with the 30S subunit of the 70S ribosome
Source: PubMed Central journal article supplement (PMC10187937; doi:10.1371/journal.pbio.3002091), 2023-05-16
Supplement: pbio.3002091.s030.pdf [file pbio.3002091.s030.pdf]

**S17 Fig. Codon-optimized 16S rRNA methyltransferase resistance gene sequence.**

***armA***

GCTAAGGAGGTAACATATGGACAAGAATGACGTGGTCAAAAAAATTCTGGAAAGCA  
AAAAATACGAAAATTTGGATTCCGACATTGTCGAGAAAGTAGTATCCATTTTCAGAG  
AAGAAATATAAGCTTAAAGAAGTGGAAAATTACAGCAAAAAGAACTTCATCAAAT  
TTGGGGAAGTTACTACTCTGCGTATCCTAACTGGGATAAACTTTTAAAGAAGTACAA  
CCAAGGCCAATTATCTATTGAGGATCTGCTTAAAATTCACAGCTCCACGAATGAACG  
TGTCGCGACACTTAATGACTTCTACACTTATGTATTTGGTAATATCAAACATGTCTCG  
TCTATCCTTGACTTCGGTTGCGGCTTCAACCCGTTGGCATTGTATCAGTGGAATGAA  
AATGAAAAGATCATTACCATGCTTACGATATCGACCGTGCAGAGATTGCTTTCTTA  
AGCAGTATCATCGGCAAATTA AAAACGACGATTAAGTACCGCTTTTTGAATAAGGA  
AAGTGACGTCTATAAGGGGACATATGACGTAGTATTTCTGTTGAAGATGTTGCCTGT  
CCTTAAACAACAAGACGTCAATATTTTAGACTTTCTGCAATTATTCCATACACAGAA  
CTTCGTAATTTCCCTCCCTATCAAAGCCTGTCTGGAAAGGAAAAAGGCATGGAGGA  
AAATTACCAGTTGTGGTTCGAATCTTTCACCAAAGGTTGGATTA AAAATTTTGGACTC  
GAAAGTGATTGGTAACGAATTGGTATACATCACTTCGGGCTTCCAAAAGTAA

***npmA***

GCTAAGGAGGtTAACATATGCTGATTCTGAAAGGAACTAAAACGGTAGATTTAAGTA  
AAGACGAACTTACTGAAATTATCGGCCAATTTGATCGCGTTCACATTGATTTGGGCA  
CAGGAGATGGCCGCAACATCTATAAGCTGGCGATTAATGATCAGAATACTTTTTATA  
TCGGCATCGACCCAGTTAAGGAGAATCTGTTTGATATCTCAAAGAAAATTATTAAGA  
AGCCTTCCAAGGGGGGACTTAGTAATGTAGTGTTTCGTGATCGCCGCTGCGGAATCTT  
TGCCCTTTGAGCTTAAAAACATTGCCGACTCCATCTCGATTCTTTTTCCATGGGGCAC  
ACTGTTGGAGTATGTAATCAAACCAACCGCGACATCTTATCAAATGTAGCAGACCT  
TGCTAAAAAAGAGGCTCACTTTGAGTTTGTGACGACATATAGCGATAGTTACGAAG  
AAGCTGAAATCAAGAAGCGTGGCCTGCCACTTCTTAGCAAGGCTTACTTTTTGTCTG  
ACAATATAAGGCTGAACTTTCTAATAGTGGATTTTCGTATCGACGATGTGAAGGAAC  
TTGACAATGAGTATGTCAAGCAATTTAATAGCCTGTGGGCAAAGCGTTTAGCATTCG  
GTCGTAAGCGCTCGTTCTTCCGCGTGTCCGGTCATGTATCGAAACACTAA
