# Supplementary material for: Streptothricin F is a bactericidal antibiotic effective against highly drug-resistant gram-negative bacteria that interacts with the 30S subunit of the 70S ribosome
Source: PLoS Biol. 2023 May 16;21(5):e3002091. doi: 10.1371/journal.pbio.3002091 (PMC10187937; doi:10.1371/journal.pbio.3002091)
Supplement: S7 Data — Contains underlying data for S9C Fig. (XLSX) [file pbio.3002091.s037.xlsx]

## Sheet: SF_Ppop_50s
wave_number	fsc_nomask	fsc_loosemask	fsc_tightmask	fsc_noisesub_raw	fsc_noisesub_true	fsc_noisesub		S7 Data. GS-FSC curves of focus-refined regions of the 70S – S-F complex. Contains underlying data for Fig. S9C
0.5	1	1	1	1	nan	1
1.5	0.999844	0.999996	1	1	0	1
2.5	0.999832	0.999988	0.999999	0.999999	-0.375	0.999999
3.5	0.999497	0.999936	0.99999	0.99999	-0.054217	0.99999
4.5	0.999265	0.999917	0.999967	0.999969	-0.045541	0.999967
5.5	0.998984	0.999919	0.999961	0.999962	-0.023328	0.999961
6.5	0.998283	0.999875	0.999922	0.999919	0.034789	0.999922
7.5	0.997545	0.999769	0.999859	0.999856	0.022277	0.999859
8.5	0.996423	0.999639	0.999751	0.999748	0.008294	0.999751
9.5	0.996675	0.999735	0.999806	0.999805	0.002141	0.999806
10.5	0.996602	0.999704	0.999816	0.999813	0.016884	0.999816
11.5	0.99534	0.999575	0.999784	0.999776	0.0375	0.999784
12.5	0.995129	0.999559	0.999762	0.999759	0.012132	0.999762
13.5	0.99513	0.999468	0.999719	0.999716	0.010065	0.999719
14.5	0.995051	0.999455	0.999742	0.999739	0.012332	0.999742
15.5	0.994196	0.999383	0.999739	0.999736	0.011302	0.999739
16.5	0.993114	0.999235	0.999664	0.999664	0.002127	0.999664
17.5	0.990563	0.998998	0.999592	0.999592	0.00073	0.999592
18.5	0.988666	0.99883	0.999548	0.999549	-0.003305	0.999548
19.5	0.984778	0.998405	0.999435	0.999438	-0.005518	0.999435
20.5	0.981074	0.997691	0.99929	0.999294	-0.005231	0.99929
21.5	0.971532	0.996739	0.999042	0.999035	0.007287	0.999042
22.5	0.966973	0.996499	0.998927	0.998914	0.011962	0.998927
23.5	0.961861	0.995831	0.998765	0.998735	0.023789	0.998765
24.5	0.953761	0.994591	0.998483	0.998451	0.020206	0.998483
25.5	0.946781	0.993968	0.99824	0.998224	0.008493	0.99824
26.5	0.94736	0.993609	0.99816	0.998157	0.001617	0.99816
27.5	0.944258	0.992817	0.998074	0.998069	0.002839	0.998074
28.5	0.935059	0.991845	0.997645	0.997612	0.014003	0.997645
29.5	0.929685	0.990782	0.997169	0.997124	0.015608	0.997169
30.5	0.922304	0.990764	0.996988	0.996988	0.000317	0.996988
31.5	0.918229	0.991001	0.997093	0.99712	-0.009417	0.997093
32.5	0.91392	0.989993	0.996869	0.996909	-0.012861	0.996869
33.5	0.912887	0.989639	0.996582	0.996619	-0.01086	0.996582
34.5	0.915355	0.989986	0.996751	0.996791	-0.012558	0.996751
35.5	0.9106	0.989506	0.996782	0.996815	-0.010537	0.996782
36.5	0.905688	0.988557	0.99671	0.996742	-0.009844	0.99671
37.5	0.905276	0.988154	0.996642	0.99667	-0.008485	0.996642
38.5	0.896402	0.987277	0.996557	0.996543	0.004103	0.996557
39.5	0.886457	0.986113	0.996157	0.996134	0.00595	0.996157
40.5	0.877918	0.984521	0.995829	0.995806	0.005528	0.995829
41.5	0.872394	0.984049	0.995538	0.995541	-0.000682	0.995538
42.5	0.863218	0.983059	0.995275	0.995271	0.001008	0.995275
43.5	0.853715	0.98179	0.994928	0.994923	0.000916	0.994928
44.5	0.83533	0.979779	0.99449	0.99448	0.001728	0.99449
45.5	0.825705	0.977827	0.993891	0.993921	-0.00502	0.993891
46.5	0.809092	0.975058	0.993292	0.993345	-0.007926	0.993292
47.5	0.792766	0.97273	0.992682	0.99269	-0.001084	0.992682
48.5	0.783354	0.971254	0.992223	0.992182	0.005329	0.992223
49.5	0.774998	0.969681	0.991729	0.991668	0.007261	0.991729
50.5	0.765766	0.96864	0.990897	0.99084	0.006188	0.990897
51.5	0.755294	0.968148	0.990664	0.990643	0.002268	0.990664
52.5	0.742184	0.966186	0.990368	0.990381	-0.00132	0.990368
53.5	0.73951	0.965607	0.989963	0.989981	-0.001797	0.989963
54.5	0.731792	0.964021	0.989495	0.9895	-0.000437	0.989495
55.5	0.728075	0.962435	0.989382	0.989334	0.004487	0.989382
56.5	0.719751	0.961144	0.988725	0.988712	0.00123	0.988725
57.5	0.712542	0.960237	0.988088	0.988125	-0.003112	0.988088
58.5	0.698126	0.958071	0.987578	0.987614	-0.002936	0.987578
59.5	0.683029	0.955093	0.986604	0.986623	-0.00143	0.986604
60.5	0.679352	0.953785	0.986035	0.986027	0.000533	0.986035
61.5	0.66771	0.952166	0.985649	0.985648	4.6e-05	0.985649
62.5	0.652719	0.949539	0.984846	0.984875	-0.001931	0.984846
63.5	0.64045	0.946541	0.984249	0.984325	-0.004886	0.984249
64.5	0.625596	0.942735	0.983245	0.983274	-0.001703	0.983245
65.5	0.614635	0.941078	0.98235	0.982285	0.003674	0.98235
66.5	0.60617	0.940073	0.982049	0.981912	0.00754	0.982049
67.5	0.59497	0.938956	0.981869	0.981819	0.002777	0.981869
68.5	0.596717	0.937614	0.981266	0.981278	-0.00064	0.981266
69.5	0.593126	0.937436	0.981013	0.980957	0.002942	0.981013
70.5	0.588939	0.936213	0.980924	0.980921	0.000191	0.980924
71.5	0.59226	0.937604	0.981172	0.981226	-0.002841	0.981172
72.5	0.597219	0.938903	0.981573	0.981574	-3.6e-05	0.981573
73.5	0.593512	0.936364	0.981323	0.981354	-0.00163	0.981323
74.5	0.579927	0.933349	0.980312	0.980374	-0.003162	0.980312
75.5	0.572933	0.931764	0.979718	0.979727	-0.000441	0.979718
76.5	0.566551	0.931644	0.979624	0.979572	0.002553	0.979624
77.5	0.566812	0.931339	0.979255	0.979212	0.002027	0.979255
78.5	0.556093	0.930093	0.979007	0.978992	0.000681	0.979007
79.5	0.559445	0.930905	0.979149	0.979169	-0.00095	0.979149
80.5	0.558367	0.930109	0.978708	0.978788	-0.003762	0.978708
81.5	0.54912	0.927134	0.97814	0.978153	-0.000592	0.97814
82.5	0.538132	0.924974	0.977638	0.977536	0.004569	0.977638
83.5	0.530538	0.923346	0.97684	0.976755	0.00368	0.97684
84.5	0.527514	0.921599	0.975906	0.975905	7e-06	0.975906
85.5	0.524156	0.92134	0.975784	0.975803	-0.000808	0.975784
86.5	0.517891	0.920166	0.975424	0.975428	-0.00018	0.975424
87.5	0.508065	0.916459	0.974395	0.974317	0.003015	0.974395
88.5	0.490628	0.913212	0.973718	0.973488	0.008705	0.973718
89.5	0.49755	0.911814	0.973565	0.973186	0.014109	0.973565
90.5	0.486296	0.91057	0.973387	0.972999	0.014355	0.973387
91.5	0.48114	0.908132	0.972895	0.972666	0.008387	0.972895
92.5	0.475211	0.908416	0.972466	0.972286	0.00648	0.972466
93.5	0.465565	0.904734	0.971667	0.971387	0.009784	0.971667
94.5	0.45518	0.90068	0.970403	0.970023	0.012666	0.970403
95.5	0.439557	0.89563	0.968352	0.968009	0.010724	0.968352
96.5	0.429676	0.891482	0.966027	0.96579	0.006936	0.966027
97.5	0.41596	0.888014	0.965052	0.964935	0.003342	0.965052
98.5	0.41004	0.887045	0.965159	0.965002	0.004494	0.965159
99.5	0.407351	0.884164	0.964781	0.96451	0.007637	0.964781
100.5	0.395874	0.879221	0.963079	0.962746	0.008939	0.963079
101.5	0.386203	0.875883	0.961117	0.960827	0.007403	0.961117
102.5	0.375197	0.869421	0.959069	0.958673	0.009587	0.959069
103.5	0.363487	0.864584	0.957124	0.956568	0.0128	0.957124
104.5	0.352783	0.858335	0.955146	0.954505	0.014091	0.955146
105.5	0.338879	0.852619	0.953848	0.953312	0.01149	0.953848
106.5	0.332441	0.847731	0.952395	0.951884	0.010627	0.952395
107.5	0.321657	0.846104	0.950979	0.950371	0.012257	0.950979
108.5	0.317148	0.8426	0.949771	0.949081	0.013552	0.949771
109.5	0.312376	0.838248	0.948515	0.9479	0.011791	0.948515
110.5	0.290201	0.830386	0.945518	0.945108	0.007473	0.945518
111.5	0.281162	0.821207	0.942134	0.941904	0.003948	0.942134
112.5	0.275271	0.815413	0.939228	0.938753	0.007753	0.939228
113.5	0.267347	0.810687	0.937324	0.936525	0.012581	0.937324
114.5	0.264012	0.806961	0.936253	0.93504	0.01868	0.936253
115.5	0.254527	0.802009	0.934182	0.9328	0.020558	0.934182
116.5	0.247235	0.791881	0.930228	0.928744	0.020826	0.930228
117.5	0.239324	0.78324	0.925983	0.924434	0.020495	0.925983
118.5	0.225749	0.775286	0.922615	0.921088	0.01935	0.922615
119.5	0.217934	0.768905	0.920829	0.918678	0.026448	0.920829
120.5	0.210742	0.761659	0.917631	0.914726	0.034059	0.917631
121.5	0.201877	0.751116	0.914449	0.910305	0.046197	0.914449
122.5	0.19671	0.745819	0.911541	0.90645	0.054419	0.911541
123.5	0.189849	0.739492	0.908612	0.9029	0.058828	0.908612
124.5	0.186811	0.732277	0.906339	0.90031	0.060473	0.906339
125.5	0.184667	0.72758	0.903359	0.895776	0.072755	0.903359
126.5	0.173334	0.72199	0.900076	0.889858	0.092764	0.900076
127.5	0.169434	0.714054	0.896482	0.882618	0.118107	0.896482
128.5	0.162602	0.705242	0.892806	0.86817	0.186873	0.892806
129.5	0.15539	0.69353	0.888184	0.823098	0.367923	0.888184
130.5	0.148787	0.681041	0.881688	0.691984	0.61589	0.881688
131.5	0.139153	0.666601	0.874339	0.424211	0.781759	0.874339
132.5	0.131253	0.646652	0.867767	0.200707	0.834562	0.834562
133.5	0.123689	0.630981	0.859743	0.136089	0.837648	0.837648
134.5	0.113176	0.616391	0.850713	0.113514	0.831597	0.831597
135.5	0.103543	0.594704	0.838741	0.103243	0.820176	0.820176
136.5	0.095495	0.569498	0.824242	0.094752	0.805845	0.805845
137.5	0.086091	0.543045	0.808404	0.081067	0.791501	0.791501
138.5	0.078977	0.515829	0.790373	0.071047	0.77434	0.77434
139.5	0.066907	0.486758	0.772402	0.062056	0.757343	0.757343
140.5	0.060616	0.459882	0.75376	0.050277	0.740724	0.740724
141.5	0.057772	0.437822	0.73126	0.04417	0.718841	0.718841
142.5	0.05185	0.403212	0.704441	0.040801	0.691869	0.691869
143.5	0.043611	0.369987	0.679795	0.038451	0.66699	0.66699
144.5	0.041568	0.349291	0.662223	0.037977	0.648889	0.648889
145.5	0.036954	0.327728	0.642101	0.034073	0.629476	0.629476
146.5	0.034881	0.300709	0.610828	0.026397	0.600276	0.600276
147.5	0.028955	0.268627	0.575734	0.020862	0.566695	0.566695
148.5	0.020197	0.245027	0.54881	0.022533	0.538409	0.538409
149.5	0.024283	0.230445	0.523381	0.016605	0.515333	0.515333
150.5	0.022558	0.216205	0.504361	0.007188	0.500772	0.500772
151.5	0.021856	0.206618	0.491195	0.00554	0.488361	0.488361
152.5	0.016819	0.19454	0.468671	0.012847	0.461756	0.461756
153.5	0.013862	0.184415	0.442644	0.017529	0.4327	0.4327
154.5	0.01455	0.165145	0.420257	0.012649	0.41283	0.41283
155.5	0.014359	0.148678	0.396786	0.006184	0.393033	0.393033
156.5	0.014102	0.139038	0.37813	0.006666	0.373957	0.373957
157.5	0.011556	0.129426	0.365716	0.008564	0.360237	0.360237
158.5	0.011529	0.124572	0.353461	0.010322	0.346718	0.346718
159.5	0.012274	0.119239	0.339617	0.011698	0.331801	0.331801
160.5	0.0072	0.110936	0.32145	0.014646	0.311364	0.311364
161.5	0.009188	0.098768	0.295988	0.017726	0.283284	0.283284
162.5	0.007687	0.093445	0.275455	0.013162	0.265791	0.265791
163.5	0.011404	0.090729	0.264677	0.00398	0.261739	0.261739
164.5	0.004418	0.08773	0.255116	0.001474	0.254017	0.254017
165.5	0.008627	0.083152	0.244399	0.007029	0.23905	0.23905
166.5	0.007623	0.07524	0.232985	0.001415	0.231898	0.231898
167.5	0.004396	0.072893	0.223444	-0.004315	0.226781	0.226781
168.5	0.007486	0.062666	0.209248	-0.001126	0.210137	0.210137
169.5	0.008664	0.057448	0.194747	-0.00062	0.195246	0.195246
170.5	0.004304	0.059983	0.17697	0.001641	0.175618	0.175618
171.5	0.003027	0.053862	0.165118	0.005296	0.160673	0.160673
172.5	0.005731	0.047717	0.155724	0.005552	0.151011	0.151011
173.5	0.00373	0.042501	0.145457	0.00094	0.144653	0.144653
174.5	0.002182	0.038291	0.137424	0.003436	0.13445	0.13445
175.5	-0.001487	0.037278	0.130807	0.004851	0.12657	0.12657
176.5	-0.000161	0.031952	0.122164	0.004306	0.118368	0.118368
177.5	0.002484	0.026414	0.110185	0.005113	0.105612	0.105612
178.5	0.003552	0.027033	0.105314	0.006837	0.099155	0.099155
179.5	0.001067	0.02955	0.102829	0.005133	0.0982	0.0982
180.5	0.004936	0.025969	0.09435	-0.003665	0.097657	0.097657
181.5	-0.000219	0.023646	0.087075	-0.009212	0.095408	0.095408
182.5	0.000838	0.019734	0.077923	-0.00565	0.083104	0.083104
183.5	0.001224	0.015193	0.072176	-0.005201	0.076976	0.076976
184.5	0.001332	0.017607	0.064192	-0.003574	0.067525	0.067525
185.5	0.001922	0.019853	0.056844	0.002542	0.054441	0.054441
186.5	0.002761	0.013087	0.048875	0.004872	0.044218	0.044218
187.5	-0.002117	0.009639	0.046498	-0.000802	0.047262	0.047262
188.5	0.000599	0.008929	0.042325	-0.006682	0.048681	0.048681
189.5	-0.001006	0.01183	0.045768	-0.008341	0.053661	0.053661
190.5	0.003087	0.010153	0.050193	-0.008514	0.058211	0.058211
191.5	0.00059	0.011612	0.047027	-0.009383	0.055886	0.055886
192.5	0.002887	0.012348	0.039664	-0.007646	0.046951	0.046951
193.5	0.001784	0.009629	0.033044	-0.003214	0.036142	0.036142
194.5	-0.001491	0.00663	0.026728	-0.000106	0.026831	0.026831
195.5	0.002005	0.004599	0.028357	0.000481	0.02789	0.02789
196.5	-0.001722	0.006188	0.025203	0.000885	0.024339	0.024339
197.5	-0.000577	0.005779	0.024327	0.004554	0.019863	0.019863
198.5	0.00149	0.006522	0.02192	0.008279	0.013755	0.013755
199.5	0.002756	0.001241	0.018687	0.001381	0.01733	0.01733
200.5	-0.002866	0.000104	0.019469	0.000507	0.018971	0.018971
201.5	0.001062	0.001504	0.014479	0.002091	0.012414	0.012414
202.5	-0.000965	-0.001388	0.010473	0.001	0.009482	0.009482
203.5	-0.001754	0.001006	0.011682	-0.003428	0.015058	0.015058
204.5	0.000436	0.009052	0.017804	-0.002024	0.019788	0.019788
205.5	0.003485	0.002852	0.014939	-0.002382	0.01728	0.01728
206.5	0.001131	0.003325	0.010521	-0.009422	0.019756	0.019756
207.5	0.000627	0.003008	0.010382	-0.006672	0.016941	0.016941
208.5	-0.002717	0.003885	0.007885	0.00144	0.006453	0.006453
209.5	-0.001842	0.000394	0.006245	0.00289	0.003365	0.003365
210.5	0.002495	0.003676	0.009396	-0.001075	0.01046	0.01046
211.5	0.00547	0.004768	0.009646	-0.00454	0.014122	0.014122
212.5	0.001504	4.4e-05	0.006433	-0.001862	0.00828	0.00828
213.5	-0.002062	-0.002876	0.002917	0.002242	0.000677	0.000677
214.5	-0.00055	-0.005236	0.002392	0.002919	-0.000529	-0.000529
215.5	-0.000186	-0.002095	0.007721	0.003776	0.00396	0.00396
216.5	0.000823	0.003022	0.012388	0.002457	0.009956	0.009956
217.5	0.001644	0.00303	0.008703	0.002009	0.006708	0.006708
218.5	-0.000216	-0.002158	0.000889	4.7e-05	0.000842	0.000842
219.5	-0.000742	-0.002035	-0.002451	0.002511	-0.004975	-0.004975
220.5	-0.001013	-0.004562	-0.004278	0.002799	-0.007097	-0.007097
221.5	-0.001151	-0.003036	-0.005874	-0.001608	-0.004259	-0.004259
222.5	0.001497	-0.002001	-0.002006	-0.005679	0.003652	0.003652
223.5	0.002372	-0.002295	-0.002093	-0.003794	0.001694	0.001694
224.5	0.000843	0.003945	0.000119	-0.004474	0.004573	0.004573
225.5	0.000622	0.004237	0.002672	-0.005226	0.007857	0.007857
226.5	-0.000662	-0.000817	-0.000969	0.001861	-0.002835	-0.002835
227.5	-0.001077	-0.003178	-0.004938	0.007956	-0.012997	-0.012997
228.5	0.001557	-0.004932	-0.00254	0.005595	-0.008181	-0.008181
229.5	-0.003663	-0.003278	-0.001011	0.002764	-0.003786	-0.003786
230.5	0.0011	-0.001395	-0.000335	0.003965	-0.004317	-0.004317
231.5	0.001301	-0.001451	0.001578	0.002856	-0.001282	-0.001282
232.5	0.001483	-0.001339	0.002917	-0.001738	0.004646	0.004646
233.5	0.000131	-0.000605	0.003859	-0.004306	0.008131	0.008131
234.5	-0.000733	-0.001352	0.000344	-0.002655	0.002991	0.002991
235.5	0.000529	0.000662	-0.005	0.002997	-0.008022	-0.008022
236.5	-0.001412	-0.002811	-0.00357	0.005832	-0.009456	-0.009456
237.5	8.9e-05	0.000777	-0.000943	0.002401	-0.003352	-0.003352
238.5	-0.000183	0.003413	-0.000701	0.000199	-0.000899	-0.000899
239.5	-0.000149	0.00266	-0.003007	0.000755	-0.003765	-0.003765
240.5	-0.000377	-0.00064	-0.002474	0.000791	-0.003268	-0.003268
241.5	-0.002599	-0.002968	0.000578	-0.001051	0.001627	0.001627
242.5	-0.000452	-0.00479	0.002853	0.000527	0.002327	0.002327
243.5	-0.001722	-0.007122	0.001245	0.00273	-0.001488	-0.001488
244.5	0.000864	-0.002649	-0.000375	0.00186	-0.00224	-0.00224
245.5	0.000192	-5e-06	0.000113	-0.000213	0.000326	0.000326
246.5	-0.001007	0.000199	-0.000103	0.00026	-0.000363	-0.000363
247.5	0.00177	-0.000447	-0.000409	0.001662	-0.002074	-0.002074
248.5	-6.6e-05	-0.001546	-0.002546	0.003084	-0.005648	-0.005648
249.5	0.0004	0.001088	-0.003033	0.002964	-0.006015	-0.006015
250.5	0.000164	-0.000404	-0.001348	0.00235	-0.003707	-0.003707
251.5	0.002531	-0.000674	-0.001625	-0.001075	-0.00055	-0.00055
252.5	-0.001488	0.000411	-0.000252	-0.000346	9.4e-05	9.4e-05
253.5	-0.00231	0.00195	0.0035	0.00042	0.003081	0.003081

## Sheet: SF_Ppop_30s_core
wave_number	fsc_nomask	fsc_loosemask	fsc_tightmask	fsc_noisesub_raw	fsc_noisesub_true	fsc_noisesub
0.5	1	1	1	1	nan	1
1.5	0.999847	0.999997	1	1	0	1
2.5	0.999833	0.99999	0.999998	0.999998	0.058824	0.999998
3.5	0.999451	0.999965	0.999994	0.999994	0.067961	0.999994
4.5	0.999277	0.999939	0.999989	0.999988	0.110048	0.999989
5.5	0.999038	0.999929	0.999977	0.999974	0.100917	0.999977
6.5	0.998282	0.999894	0.999954	0.999952	0.04674	0.999954
7.5	0.99747	0.999822	0.999931	0.99993	0.008525	0.999931
8.5	0.996011	0.999754	0.999883	0.999878	0.039024	0.999883
9.5	0.996339	0.999684	0.999817	0.9998	0.080645	0.999817
10.5	0.996228	0.999611	0.999798	0.99978	0.081954	0.999798
11.5	0.994683	0.99951	0.999758	0.999745	0.048866	0.999758
12.5	0.994811	0.999465	0.99972	0.999711	0.033587	0.99972
13.5	0.994062	0.999442	0.999704	0.999702	0.005403	0.999704
14.5	0.994085	0.999433	0.999725	0.99973	-0.017901	0.999725
15.5	0.993214	0.999341	0.99974	0.999745	-0.018203	0.99974
16.5	0.99174	0.999111	0.999684	0.999686	-0.005877	0.999684
17.5	0.988345	0.998943	0.999565	0.999561	0.009239	0.999565
18.5	0.985801	0.99858	0.999444	0.999433	0.019346	0.999444
19.5	0.980419	0.998059	0.99937	0.999368	0.002548	0.99937
20.5	0.975238	0.997669	0.999276	0.999284	-0.010901	0.999276
21.5	0.962825	0.996547	0.999047	0.999057	-0.010049	0.999047
22.5	0.952774	0.995181	0.998672	0.998645	0.019748	0.998672
23.5	0.947021	0.994632	0.998424	0.998373	0.031221	0.998424
24.5	0.936614	0.993946	0.998389	0.998351	0.022987	0.998389
25.5	0.930098	0.993096	0.998311	0.998285	0.014844	0.998311
26.5	0.928088	0.992564	0.998071	0.998068	0.001666	0.998071
27.5	0.925365	0.992169	0.997734	0.997745	-0.004758	0.997734
28.5	0.91707	0.991675	0.997442	0.997435	0.002649	0.997442
29.5	0.904843	0.990591	0.997211	0.997187	0.008307	0.997211
30.5	0.894872	0.990099	0.997121	0.997121	-6.2e-05	0.997121
31.5	0.889907	0.989624	0.996929	0.996969	-0.013097	0.996929
32.5	0.884946	0.988511	0.996667	0.996711	-0.013449	0.996667
33.5	0.881027	0.988209	0.996461	0.99647	-0.002482	0.996461
34.5	0.88215	0.98773	0.996432	0.996427	0.001434	0.996432
35.5	0.874195	0.98718	0.996361	0.996363	-0.000574	0.996361
36.5	0.866187	0.986938	0.99609	0.996117	-0.007093	0.99609
37.5	0.862111	0.986207	0.995878	0.995923	-0.01101	0.995878
38.5	0.851287	0.985363	0.995986	0.996028	-0.010624	0.995986
39.5	0.83369	0.984199	0.995924	0.995959	-0.008688	0.995924
40.5	0.825364	0.983709	0.995473	0.995498	-0.005561	0.995473
41.5	0.813284	0.982052	0.994805	0.994762	0.008261	0.994805
42.5	0.796062	0.979509	0.994211	0.994142	0.011772	0.994211
43.5	0.780744	0.977835	0.993706	0.993689	0.002682	0.993706
44.5	0.752675	0.974342	0.993048	0.99308	-0.004651	0.993048
45.5	0.731039	0.97085	0.99244	0.992455	-0.002022	0.99244
46.5	0.710969	0.968717	0.991618	0.991614	0.000519	0.991618
47.5	0.689499	0.96493	0.990523	0.990504	0.002027	0.990523
48.5	0.672313	0.962121	0.989704	0.98968	0.002385	0.989704
49.5	0.660926	0.961227	0.989335	0.989347	-0.001097	0.989335
50.5	0.653388	0.961422	0.989183	0.989126	0.005235	0.989183
51.5	0.642189	0.959112	0.988549	0.988402	0.012683	0.988549
52.5	0.627014	0.957166	0.988147	0.98794	0.017204	0.988147
53.5	0.608988	0.954058	0.987449	0.987229	0.017185	0.987449
54.5	0.597485	0.950687	0.986337	0.986168	0.012251	0.986337
55.5	0.582773	0.947332	0.985404	0.985272	0.008968	0.985404
56.5	0.580879	0.946039	0.985344	0.98523	0.007708	0.985344
57.5	0.570364	0.944807	0.984885	0.98481	0.004964	0.984885
58.5	0.548052	0.941814	0.983884	0.983864	0.00126	0.983884
59.5	0.532994	0.939399	0.982843	0.982953	-0.006405	0.982843
60.5	0.525027	0.937468	0.982025	0.982147	-0.006851	0.982025
61.5	0.515402	0.93349	0.98097	0.980972	-0.000153	0.98097
62.5	0.482865	0.926928	0.979036	0.978897	0.006559	0.979036
63.5	0.457172	0.920475	0.976669	0.976447	0.009447	0.976669
64.5	0.440753	0.915125	0.974474	0.974422	0.002032	0.974474
65.5	0.431262	0.911704	0.973318	0.97355	-0.008782	0.973318
66.5	0.408953	0.906978	0.972372	0.972775	-0.014782	0.972372
67.5	0.400344	0.903998	0.971198	0.97166	-0.016332	0.971198
68.5	0.399068	0.90304	0.970409	0.97077	-0.012359	0.970409
69.5	0.401248	0.902455	0.97033	0.970444	-0.003854	0.97033
70.5	0.388249	0.903265	0.970176	0.970185	-0.000308	0.970176
71.5	0.393179	0.903799	0.970339	0.970367	-0.000959	0.970339
72.5	0.389538	0.903388	0.9707	0.970725	-0.000845	0.9707
73.5	0.378229	0.898983	0.970488	0.970574	-0.002905	0.970488
74.5	0.367782	0.894246	0.970046	0.970205	-0.005333	0.970046
75.5	0.355569	0.892412	0.969479	0.969829	-0.011591	0.969479
76.5	0.351296	0.893788	0.969376	0.969662	-0.009423	0.969376
77.5	0.361454	0.894749	0.96922	0.969472	-0.008257	0.96922
78.5	0.342554	0.8908	0.96847	0.968653	-0.005841	0.96847
79.5	0.331161	0.88522	0.967172	0.967167	0.000154	0.967172
80.5	0.336337	0.883101	0.966273	0.966091	0.005361	0.966273
81.5	0.329744	0.882007	0.965683	0.965577	0.003073	0.965683
82.5	0.320556	0.879091	0.964755	0.964809	-0.001516	0.964755
83.5	0.315249	0.875543	0.963737	0.963531	0.005627	0.963737
84.5	0.307988	0.873329	0.963016	0.962612	0.010804	0.963016
85.5	0.301187	0.868735	0.962508	0.961887	0.016274	0.962508
86.5	0.295563	0.865359	0.961708	0.961224	0.012486	0.961708
87.5	0.283517	0.862644	0.960712	0.960109	0.015121	0.960712
88.5	0.274477	0.862658	0.959996	0.959535	0.011389	0.959996
89.5	0.276355	0.858826	0.95884	0.958669	0.004145	0.95884
90.5	0.256777	0.850185	0.956866	0.956709	0.00364	0.956866
91.5	0.250424	0.843706	0.954731	0.953851	0.019069	0.954731
92.5	0.246842	0.841224	0.953926	0.952244	0.03523	0.953926
93.5	0.239297	0.837336	0.953078	0.950995	0.042523	0.953078
94.5	0.231655	0.833254	0.951829	0.949483	0.046436	0.951829
95.5	0.219999	0.827683	0.949751	0.947322	0.046123	0.949751
96.5	0.213205	0.819659	0.946565	0.943926	0.047058	0.946565
97.5	0.200361	0.808087	0.94311	0.939868	0.053927	0.94311
98.5	0.191469	0.79812	0.940274	0.935876	0.068594	0.940274
99.5	0.189782	0.789878	0.937694	0.931995	0.083801	0.937694
100.5	0.18015	0.781443	0.935015	0.928556	0.090405	0.935015
101.5	0.173428	0.777503	0.932672	0.924624	0.106768	0.932672
102.5	0.165109	0.77395	0.930753	0.919563	0.139113	0.930753
103.5	0.160961	0.770915	0.928973	0.91144	0.197988	0.928973
104.5	0.163402	0.762326	0.926254	0.893562	0.30715	0.926254
105.5	0.144064	0.75395	0.923027	0.853138	0.475886	0.923027
106.5	0.13896	0.744282	0.919374	0.757012	0.668191	0.919374
107.5	0.133868	0.73645	0.916141	0.57714	0.801686	0.916141
108.5	0.131571	0.725909	0.913105	0.387563	0.858116	0.858116
109.5	0.123268	0.715178	0.908392	0.281294	0.872538	0.872538
110.5	0.116081	0.704062	0.903467	0.226734	0.875163	0.875163
111.5	0.106848	0.693284	0.899095	0.189631	0.875483	0.875483
112.5	0.108129	0.682426	0.89513	0.156679	0.875647	0.875647
113.5	0.100579	0.669058	0.891082	0.128601	0.875007	0.875007
114.5	0.095355	0.654073	0.88647	0.108294	0.872682	0.872682
115.5	0.092954	0.643483	0.882044	0.096958	0.869379	0.869379
116.5	0.085471	0.633244	0.877452	0.088466	0.865558	0.865558
117.5	0.08338	0.621747	0.872788	0.075258	0.862435	0.862435
118.5	0.075103	0.608516	0.866775	0.065102	0.857498	0.857498
119.5	0.072484	0.593552	0.859027	0.065088	0.849212	0.849212
120.5	0.072061	0.581937	0.852606	0.068006	0.841851	0.841851
121.5	0.069393	0.572282	0.847319	0.066343	0.83647	0.83647
122.5	0.066798	0.569807	0.844176	0.058856	0.834431	0.834431
123.5	0.068033	0.56039	0.83834	0.047301	0.830313	0.830313
124.5	0.057351	0.549521	0.833445	0.041165	0.826294	0.826294
125.5	0.056381	0.539082	0.828253	0.036177	0.821806	0.821806
126.5	0.054534	0.528241	0.821417	0.035409	0.814861	0.814861
127.5	0.051526	0.516839	0.814615	0.040549	0.80678	0.80678
128.5	0.051166	0.505517	0.804457	0.038163	0.796698	0.796698
129.5	0.043823	0.4878	0.793544	0.029262	0.787321	0.787321
130.5	0.040521	0.472031	0.784383	0.024893	0.778879	0.778879
131.5	0.039489	0.458476	0.774	0.03007	0.766994	0.766994
132.5	0.038872	0.444336	0.763697	0.032027	0.755879	0.755879
133.5	0.033077	0.421562	0.749915	0.032123	0.741615	0.741615
134.5	0.036472	0.398979	0.732455	0.030685	0.723985	0.723985
135.5	0.027966	0.375956	0.713038	0.026477	0.705234	0.705234
136.5	0.027398	0.348426	0.692451	0.01795	0.686829	0.686829
137.5	0.022228	0.326586	0.674377	0.014077	0.669728	0.669728
138.5	0.020496	0.304177	0.651802	0.019193	0.644988	0.644988
139.5	0.020081	0.27548	0.625649	0.02461	0.616204	0.616204
140.5	0.019537	0.252908	0.597144	0.020035	0.588908	0.588908
141.5	0.011193	0.229525	0.565398	0.013466	0.559466	0.559466
142.5	0.014372	0.203506	0.531275	0.007237	0.527858	0.527858
143.5	0.011284	0.172429	0.492256	0.002808	0.490826	0.490826
144.5	0.01189	0.151823	0.457621	0.003045	0.455964	0.455964
145.5	0.007564	0.134635	0.424238	0.005688	0.420944	0.420944
146.5	0.004797	0.123291	0.396612	0.002493	0.395105	0.395105
147.5	0.004085	0.115988	0.368649	0.00199	0.36739	0.36739
148.5	0.006201	0.105568	0.338543	0.00596	0.334577	0.334577
149.5	0.00374	0.09169	0.309444	0.012597	0.300634	0.300634
150.5	0.00392	0.078746	0.28936	0.015903	0.277876	0.277876
151.5	0.003472	0.064289	0.271181	0.013412	0.261273	0.261273
152.5	0.005651	0.059422	0.253187	0.004052	0.250149	0.250149
153.5	0.002141	0.060358	0.238568	-0.002433	0.240417	0.240417
154.5	0.000849	0.06114	0.225569	-0.003102	0.227964	0.227964
155.5	0.001123	0.060801	0.216778	0.00044	0.216433	0.216433
156.5	0.001609	0.05231	0.199199	-0.003332	0.201858	0.201858
157.5	0.00287	0.041156	0.178547	-0.006636	0.183963	0.183963
158.5	0.001426	0.040837	0.15559	-0.009083	0.163191	0.163191
159.5	0.001931	0.036074	0.138352	-0.005402	0.142982	0.142982
160.5	0.001176	0.027275	0.128097	-0.001446	0.129356	0.129356
161.5	0.000924	0.023284	0.12018	-0.001348	0.121365	0.121365
162.5	-0.001479	0.02631	0.117331	0.002149	0.11543	0.11543
163.5	0.00141	0.021279	0.115526	0.00502	0.111063	0.111063
164.5	0.001944	0.015145	0.106673	0.004403	0.102723	0.102723
165.5	0.003352	0.012087	0.098257	0.001774	0.096655	0.096655
166.5	-0.000536	0.016683	0.093535	0.001946	0.091767	0.091767
167.5	0.00363	0.013085	0.083013	0.002837	0.080405	0.080405
168.5	0.000399	0.013665	0.073472	0.004411	0.069367	0.069367
169.5	-0.000843	0.013859	0.06682	0.006305	0.060898	0.060898
170.5	0.000607	0.009023	0.064376	0.008504	0.05635	0.05635
171.5	-1.9e-05	0.003051	0.059838	0.008961	0.051337	0.051337
172.5	0.001911	0.003715	0.057173	0.009176	0.048441	0.048441
173.5	-0.00117	0.008855	0.057412	0.005209	0.052476	0.052476
174.5	-0.0032	0.012427	0.058048	0.005304	0.053026	0.053026
175.5	-0.000292	0.008929	0.052399	0.006597	0.046106	0.046106
176.5	-0.001617	0.005444	0.048252	0.003824	0.044599	0.044599
177.5	-0.000286	0.005945	0.045698	0.004323	0.041555	0.041555
178.5	-0.000562	0.008134	0.04674	0.006304	0.040693	0.040693
179.5	-0.001308	0.005181	0.043944	0.005731	0.038433	0.038433
180.5	-0.002855	0.00226	0.039943	0.002757	0.037288	0.037288
181.5	0.00016	0.001529	0.035809	0.000734	0.035101	0.035101
182.5	0.001611	0.002969	0.031781	0.007003	0.024953	0.024953
183.5	1.6e-05	0.005293	0.018944	0.013516	0.005502	0.005502
184.5	0.002975	0.004853	0.01102	0.011906	-0.000897	-0.000897
185.5	0.000194	0.000586	0.010334	0.002099	0.008252	0.008252
186.5	-0.002042	-0.00234	0.00996	-0.002373	0.012304	0.012304
187.5	0.001272	-0.002099	0.010215	6.5e-05	0.01015	0.01015
188.5	0.001104	-0.001497	0.010294	0.002298	0.008015	0.008015
189.5	-0.001643	-0.001129	0.014473	0.004868	0.009653	0.009653
190.5	-0.000294	0.003143	0.014508	0.003141	0.011402	0.011402
191.5	-0.000996	0.003231	0.012395	0.002126	0.010291	0.010291
192.5	0.001717	0.001349	0.010861	-0.000368	0.011225	0.011225
193.5	0.001378	0.003613	0.012681	-0.002418	0.015063	0.015063
194.5	0.002873	0.000959	0.012178	-0.0042	0.01631	0.01631
195.5	0.0019	-0.000741	0.013052	-0.001571	0.0146	0.0146
196.5	0.003476	0.000733	0.015233	0.006331	0.008959	0.008959
197.5	-5.5e-05	-0.002458	0.016145	0.009482	0.006726	0.006726
198.5	0.00015	-0.000836	0.016246	0.011453	0.004848	0.004848
199.5	0.000526	0.003262	0.014181	0.004942	0.009285	0.009285
200.5	0.001612	0.001995	0.009825	-0.003536	0.013314	0.013314
201.5	0.002974	0.003341	0.00897	-0.008943	0.017755	0.017755
202.5	-0.000489	0.000183	0.006506	-0.008656	0.015032	0.015032
203.5	0.000391	0.0023	0.004063	-0.009647	0.013578	0.013578
204.5	0.000905	0.000252	0.004599	-0.008733	0.013217	0.013217
205.5	0.001084	-0.000938	0.004067	-0.005465	0.00948	0.00948
206.5	0.000415	0.001254	0.000897	-0.001551	0.002445	0.002445
207.5	-0.00047	-8e-05	0.000937	0.002861	-0.00193	-0.00193
208.5	0.001096	0.000795	0.008765	0.004063	0.004721	0.004721
209.5	0.001579	0.004125	0.011489	0.005817	0.005705	0.005705
210.5	0.003524	0.005768	0.010332	0.009273	0.001069	0.001069
211.5	0.000382	-0.000459	0.001766	0.011188	-0.009529	-0.009529
212.5	0.000709	0.000619	-0.003394	0.009603	-0.013122	-0.013122
213.5	-0.000227	0.001405	-0.005567	0.009817	-0.015537	-0.015537
214.5	-0.00079	0.002408	-0.006876	0.008138	-0.015137	-0.015137
215.5	0.000279	0.001829	-0.007149	0.00373	-0.01092	-0.01092
216.5	-0.000536	-0.003982	-0.005485	0.002847	-0.008355	-0.008355
217.5	0.001503	-0.006577	-0.007113	0.004513	-0.011679	-0.011679
218.5	-0.001416	-0.002881	-0.006023	0.004389	-0.010458	-0.010458
219.5	0.001308	-0.001366	-0.005463	0.003298	-0.00879	-0.00879
220.5	0.001536	-0.002089	-0.000692	-0.001429	0.000736	0.000736
221.5	-0.00162	-0.000267	0.004259	-0.002863	0.007102	0.007102
222.5	0.000341	0.001733	0.005025	-0.00014	0.005164	0.005164
223.5	0.002127	7.8e-05	-0.000243	0.003662	-0.003918	-0.003918
224.5	-0.000301	-0.006201	-0.004293	0.00506	-0.0094	-0.0094
225.5	-0.001697	-0.007434	-0.004116	-0.000506	-0.003608	-0.003608
226.5	0.000882	-0.004341	-0.000919	-0.001374	0.000454	0.000454
227.5	0.000191	-0.002938	-0.00137	0.002767	-0.004149	-0.004149
228.5	-0.002235	-0.005441	-0.007578	0.0101	-0.017858	-0.017858
229.5	-0.001176	-0.005359	-0.008553	0.006427	-0.015077	-0.015077
230.5	0.002196	-0.004715	-0.007104	0.001085	-0.008198	-0.008198
231.5	1.1e-05	-0.001489	-0.002609	-0.000521	-0.002087	-0.002087
232.5	0.000668	-0.0003	0.001847	0.003081	-0.001238	-0.001238
233.5	0.002472	0.000289	0.004798	0.006701	-0.001916	-0.001916
234.5	-0.001223	0.000176	0.006198	0.005694	0.000507	0.000507
235.5	0.000143	0.000514	0.002049	0.002842	-0.000795	-0.000795
236.5	-0.001056	0.000102	-0.002133	0.000418	-0.002552	-0.002552
237.5	-0.000183	0.001313	-0.003305	0.003447	-0.006776	-0.006776
238.5	-0.000734	-0.000688	-0.003498	0.008754	-0.012359	-0.012359
239.5	0.00087	-0.002467	-0.004132	0.010089	-0.014366	-0.014366
240.5	-0.002328	-0.002437	-0.003204	0.008107	-0.011403	-0.011403
241.5	-0.004051	-0.001944	-0.00349	0.00363	-0.007147	-0.007147
242.5	-2.7e-05	0.001333	-0.004776	0.000174	-0.004951	-0.004951
243.5	-0.000228	-0.000215	-0.002626	-0.005307	0.002667	0.002667
244.5	-0.001766	-0.001031	-0.000713	-0.008577	0.007796	0.007796
245.5	0.000409	-0.000978	-0.002134	-0.006717	0.004552	0.004552
246.5	-0.002907	-9.9e-05	-0.00601	-0.005254	-0.000753	-0.000753
247.5	-0.001514	-0.000941	-0.006894	-0.006325	-0.000565	-0.000565
248.5	0.000979	-0.001717	-0.004811	-0.006703	0.00188	0.00188
249.5	-0.000501	-0.001533	-0.004221	-0.005673	0.001444	0.001444
250.5	0.000587	-0.005113	-0.004284	-0.003571	-0.00071	-0.00071
251.5	0.001214	-0.00389	-0.00605	-0.002698	-0.003343	-0.003343
252.5	-0.000733	-0.002281	-0.005467	-0.002391	-0.003069	-0.003069
253.5	-0.002315	-0.002293	-0.002525	-0.004537	0.002003	0.002003

## Sheet: SF_Ppop_30s_head
wave_number	fsc_nomask	fsc_loosemask	fsc_tightmask	fsc_noisesub_raw	fsc_noisesub_true	fsc_noisesub
0.5	1	1	1	1	nan	1
1.5	0.999798	0.999999	1	1	-0.5	1
2.5	0.999819	0.999995	1	1	-4	1
3.5	0.999363	0.999987	0.999999	0.999999	-0.692308	0.999999
4.5	0.999306	0.999971	0.999996	0.999997	-0.307692	0.999996
5.5	0.998681	0.999913	0.999972	0.999974	-0.088372	0.999972
6.5	0.997612	0.999763	0.999823	0.99984	-0.110448	0.999823
7.5	0.9968	0.999617	0.999732	0.999756	-0.096995	0.999732
8.5	0.994972	0.999467	0.999768	0.999778	-0.047619	0.999768
9.5	0.994875	0.999464	0.999784	0.99978	0.021115	0.999784
10.5	0.994548	0.999402	0.999772	0.999753	0.078223	0.999772
11.5	0.992094	0.99936	0.999744	0.999737	0.029425	0.999744
12.5	0.991858	0.999365	0.999706	0.999712	-0.021519	0.999706
13.5	0.99098	0.999298	0.999686	0.9997	-0.048073	0.999686
14.5	0.990953	0.999065	0.999676	0.999685	-0.026853	0.999676
15.5	0.988747	0.998907	0.999678	0.999676	0.007353	0.999678
16.5	0.98617	0.998711	0.999644	0.999646	-0.004205	0.999644
17.5	0.981168	0.998298	0.999562	0.999565	-0.006719	0.999562
18.5	0.975619	0.997784	0.999407	0.999419	-0.020092	0.999407
19.5	0.964978	0.997038	0.999187	0.99919	-0.003973	0.999187
20.5	0.953003	0.996361	0.998935	0.998923	0.010956	0.998935
21.5	0.933698	0.995283	0.998644	0.998624	0.014429	0.998644
22.5	0.913236	0.993698	0.998421	0.998415	0.003573	0.998421
23.5	0.909257	0.992293	0.998132	0.998148	-0.008917	0.998132
24.5	0.888585	0.990913	0.99778	0.997812	-0.015013	0.99778
25.5	0.875829	0.989757	0.997545	0.997575	-0.012116	0.997545
26.5	0.862676	0.989149	0.997608	0.997614	-0.002398	0.997608
27.5	0.858068	0.988635	0.997697	0.997718	-0.009114	0.997697
28.5	0.843877	0.987784	0.997731	0.997787	-0.02518	0.997731
29.5	0.832067	0.987489	0.997654	0.997732	-0.03438	0.997654
30.5	0.810476	0.987384	0.997512	0.997584	-0.029703	0.997512
31.5	0.79569	0.986654	0.997233	0.997279	-0.016932	0.997233
32.5	0.79619	0.985574	0.99697	0.99703	-0.020413	0.99697
33.5	0.780589	0.984292	0.996614	0.996711	-0.029411	0.996614
34.5	0.7767	0.982741	0.996329	0.996472	-0.040394	0.996329
35.5	0.749842	0.981156	0.995816	0.995967	-0.037425	0.995816
36.5	0.733347	0.980156	0.995398	0.9955	-0.022784	0.995398
37.5	0.725469	0.978338	0.994928	0.995036	-0.021685	0.994928
38.5	0.692121	0.976498	0.994443	0.994563	-0.022066	0.994443
39.5	0.672492	0.975266	0.994144	0.994286	-0.024816	0.994144
40.5	0.666689	0.973833	0.993901	0.994029	-0.021402	0.993901
41.5	0.651699	0.972065	0.99364	0.99375	-0.017623	0.99364
42.5	0.620445	0.969497	0.992968	0.993081	-0.016316	0.992968
43.5	0.59005	0.966422	0.991941	0.9921	-0.020214	0.991941
44.5	0.560463	0.962072	0.990712	0.990904	-0.021047	0.990712
45.5	0.538049	0.959579	0.989596	0.989784	-0.018373	0.989596
46.5	0.51635	0.958492	0.988915	0.989044	-0.011713	0.988915
47.5	0.483516	0.955678	0.98834	0.988408	-0.005821	0.98834
48.5	0.463371	0.952209	0.987979	0.987933	0.003813	0.987979
49.5	0.459794	0.949068	0.987596	0.987476	0.009599	0.987596
50.5	0.435666	0.946127	0.986929	0.986697	0.017447	0.986929
51.5	0.418062	0.944528	0.985882	0.985652	0.015973	0.985882
52.5	0.404532	0.941173	0.98462	0.984439	0.011633	0.98462
53.5	0.393406	0.936251	0.983115	0.983058	0.003353	0.983115
54.5	0.368753	0.932057	0.981691	0.981719	-0.001536	0.981691
55.5	0.354171	0.929001	0.980869	0.980904	-0.001842	0.980869
56.5	0.358667	0.927453	0.980303	0.980294	0.000457	0.980303
57.5	0.339726	0.923835	0.979409	0.97947	-0.002985	0.979409
58.5	0.321084	0.920305	0.978972	0.979116	-0.006876	0.978972
59.5	0.316029	0.916921	0.978469	0.978675	-0.009643	0.978469
60.5	0.299622	0.913893	0.977893	0.978045	-0.006898	0.977893
61.5	0.288542	0.91072	0.976659	0.97671	-0.00217	0.976659
62.5	0.281212	0.904606	0.975067	0.974988	0.003153	0.975067
63.5	0.265181	0.90194	0.974024	0.97388	0.005511	0.974024
64.5	0.251143	0.899162	0.973548	0.973269	0.010427	0.973548
65.5	0.254588	0.896428	0.973051	0.972789	0.009653	0.973051
66.5	0.24222	0.893198	0.97293	0.972679	0.009174	0.97293
67.5	0.228765	0.888095	0.972079	0.971823	0.009094	0.972079
68.5	0.232517	0.88482	0.97173	0.97146	0.009452	0.97173
69.5	0.224238	0.885412	0.971159	0.970715	0.015157	0.971159
70.5	0.219252	0.884066	0.9703	0.969766	0.017664	0.9703
71.5	0.209311	0.881914	0.96956	0.968991	0.018341	0.96956
72.5	0.207053	0.88025	0.968747	0.968253	0.015549	0.968747
73.5	0.207644	0.879661	0.968489	0.968285	0.006439	0.968489
74.5	0.202214	0.877408	0.968431	0.968439	-0.000249	0.968431
75.5	0.20282	0.877204	0.968737	0.968848	-0.003553	0.968737
76.5	0.205488	0.879152	0.968805	0.968773	0.001031	0.968805
77.5	0.212638	0.880148	0.968441	0.968271	0.005365	0.968441
78.5	0.195293	0.877772	0.967624	0.967355	0.008251	0.967624
79.5	0.187309	0.87324	0.966254	0.966024	0.006759	0.966254
80.5	0.185457	0.866439	0.964474	0.964175	0.00834	0.964474
81.5	0.180344	0.861618	0.962952	0.962111	0.022211	0.962952
82.5	0.169936	0.857516	0.961481	0.959891	0.039647	0.961481
83.5	0.164736	0.857776	0.961122	0.958907	0.053907	0.961122
84.5	0.172394	0.858154	0.961779	0.959266	0.061697	0.961779
85.5	0.174989	0.857615	0.962807	0.959891	0.072713	0.962807
86.5	0.166931	0.855054	0.963116	0.959702	0.084725	0.963116
87.5	0.166223	0.854306	0.962177	0.958283	0.093346	0.962177
88.5	0.165401	0.854012	0.960453	0.956218	0.096717	0.960453
89.5	0.160923	0.849579	0.958578	0.95307	0.117365	0.958578
90.5	0.153921	0.845088	0.957218	0.947902	0.178817	0.957218
91.5	0.14459	0.839675	0.956428	0.937673	0.300903	0.956428
92.5	0.144973	0.834521	0.955733	0.917016	0.466561	0.955733
93.5	0.139096	0.829795	0.954985	0.872561	0.646771	0.954985
94.5	0.135947	0.826857	0.95389	0.775501	0.79461	0.95389
95.5	0.129733	0.823373	0.952984	0.603993	0.881274	0.881274
96.5	0.122566	0.81325	0.951193	0.419629	0.915904	0.915904
97.5	0.116285	0.802322	0.949526	0.329713	0.924698	0.924698
98.5	0.102266	0.795466	0.947404	0.291913	0.925721	0.925721
99.5	0.110445	0.793129	0.945499	0.254647	0.926878	0.926878
100.5	0.102986	0.788543	0.942862	0.217299	0.926999	0.926999
101.5	0.096393	0.777559	0.939402	0.182474	0.925876	0.925876
102.5	0.095264	0.764988	0.935058	0.146352	0.923924	0.923924
103.5	0.084875	0.754452	0.930413	0.122298	0.920717	0.920717
104.5	0.079715	0.743548	0.926462	0.109178	0.917449	0.917449
105.5	0.079806	0.734658	0.923796	0.101795	0.91516	0.91516
106.5	0.073964	0.727186	0.921417	0.096616	0.913013	0.913013
107.5	0.071475	0.7235	0.918762	0.081201	0.911582	0.911582
108.5	0.071176	0.720351	0.915488	0.070053	0.909121	0.909121
109.5	0.067322	0.714887	0.911982	0.06154	0.906211	0.906211
110.5	0.069861	0.702083	0.9081	0.053747	0.90288	0.90288
111.5	0.063124	0.684279	0.903342	0.051113	0.898136	0.898136
112.5	0.059308	0.666479	0.897516	0.04809	0.892339	0.892339
113.5	0.052979	0.649104	0.891275	0.044651	0.886194	0.886194
114.5	0.046734	0.635683	0.884079	0.03238	0.880199	0.880199
115.5	0.04941	0.625149	0.879517	0.01734	0.877391	0.877391
116.5	0.047459	0.610604	0.874008	0.00803	0.872988	0.872988
117.5	0.037544	0.601788	0.870273	0.008053	0.869219	0.869219
118.5	0.037648	0.596441	0.867222	0.008097	0.866138	0.866138
119.5	0.039667	0.593169	0.865771	0.00797	0.864693	0.864693
120.5	0.043039	0.585317	0.864848	0.003993	0.864306	0.864306
121.5	0.040909	0.572294	0.862234	0.001541	0.862022	0.862022
122.5	0.037469	0.56353	0.858451	0.001098	0.858296	0.858296
123.5	0.035033	0.561831	0.853606	-0.000414	0.853666	0.853666
124.5	0.031985	0.55627	0.848191	-0.006718	0.849204	0.849204
125.5	0.031689	0.539312	0.842684	-0.001623	0.842938	0.842938
126.5	0.032424	0.521676	0.836771	0.0051	0.835935	0.835935
127.5	0.028613	0.5078	0.830361	0.01397	0.827957	0.827957
128.5	0.022544	0.49406	0.823295	0.012042	0.821141	0.821141
129.5	0.02361	0.478571	0.815355	0.0023	0.81493	0.81493
130.5	0.021853	0.463659	0.806294	-0.006615	0.807567	0.807567
131.5	0.022546	0.449994	0.79429	-0.01286	0.796902	0.796902
132.5	0.022795	0.430808	0.779487	-0.007979	0.781233	0.781233
133.5	0.016334	0.403517	0.762488	-0.005498	0.763786	0.763786
134.5	0.019213	0.376756	0.745772	-0.000739	0.74596	0.74596
135.5	0.018653	0.351291	0.726042	0.00035	0.725946	0.725946
136.5	0.010637	0.325068	0.705566	0.002994	0.704682	0.704682
137.5	0.012378	0.298143	0.683101	0.004562	0.681649	0.681649
138.5	0.009044	0.27966	0.660423	0.010029	0.656983	0.656983
139.5	0.008394	0.258884	0.635664	0.015573	0.629901	0.629901
140.5	0.012534	0.237531	0.607757	0.018608	0.60032	0.60032
141.5	0.004	0.214723	0.573784	0.01651	0.566629	0.566629
142.5	0.004993	0.190711	0.538413	0.014677	0.531537	0.531537
143.5	0.00572	0.167741	0.509319	0.013223	0.502743	0.502743
144.5	0.005122	0.151844	0.48322	0.01473	0.475494	0.475494
145.5	0.002354	0.144815	0.463272	0.016863	0.454066	0.454066
146.5	0.003312	0.131584	0.438081	0.010993	0.431835	0.431835
147.5	0.001081	0.119451	0.414279	0.006976	0.410164	0.410164
148.5	0.001337	0.105267	0.393018	0.001699	0.391985	0.391985
149.5	0.002136	0.094422	0.372625	0.001163	0.371895	0.371895
150.5	-2e-05	0.086402	0.347597	0.001086	0.346888	0.346888
151.5	0.003847	0.079423	0.321517	0.001999	0.320158	0.320158
152.5	0.00277	0.072682	0.296171	0.00261	0.294329	0.294329
153.5	0.000997	0.068981	0.271001	0.003952	0.268109	0.268109
154.5	0.005657	0.064518	0.255607	0.00333	0.25312	0.25312
155.5	0.003167	0.06134	0.235304	0.00319	0.232857	0.232857
156.5	0.001813	0.051201	0.217858	0.003875	0.214815	0.214815
157.5	0.000182	0.04164	0.201759	0.005013	0.197737	0.197737
158.5	0.003043	0.035456	0.188007	0.001913	0.186451	0.186451
159.5	-0.002867	0.031934	0.176422	-0.005178	0.180665	0.180665
160.5	0.001947	0.025867	0.162515	-0.008166	0.169298	0.169298
161.5	0.00394	0.024565	0.150397	-0.010362	0.159111	0.159111
162.5	-0.000436	0.024639	0.144241	-0.009525	0.152315	0.152315
163.5	-0.002404	0.025559	0.138312	-0.005309	0.142863	0.142863
164.5	0.000195	0.023222	0.131046	-0.006938	0.137033	0.137033
165.5	0.000256	0.023354	0.124696	-0.011755	0.134866	0.134866
166.5	0.000699	0.019814	0.112533	-0.012478	0.123471	0.123471
167.5	0.000595	0.015652	0.104545	-0.010899	0.1142	0.1142
168.5	0.000124	0.010256	0.09685	-0.002707	0.099288	0.099288
169.5	0.000301	0.00665	0.094516	0.000337	0.094211	0.094211
170.5	-0.000694	0.006272	0.091681	-0.004005	0.095304	0.095304
171.5	-0.003214	0.012076	0.090357	-0.007471	0.097103	0.097103
172.5	0.002393	0.020737	0.084741	-0.007846	0.091867	0.091867
173.5	0.005295	0.023984	0.080735	-0.00639	0.086571	0.086571
174.5	-0.00046	0.014064	0.072948	-0.004505	0.077106	0.077106
175.5	-0.00148	0.005067	0.063492	-0.004944	0.068099	0.068099
176.5	-0.000367	0.00554	0.054134	-0.006272	0.06003	0.06003
177.5	0.001692	0.01094	0.048031	-0.00446	0.052258	0.052258
178.5	-0.000416	0.013772	0.047284	-0.006958	0.053867	0.053867
179.5	-0.001218	0.01556	0.046545	-0.010474	0.056428	0.056428
180.5	0.000861	0.013982	0.046925	-0.012286	0.058492	0.058492
181.5	0.003302	0.006074	0.041531	-0.012105	0.052995	0.052995
182.5	-0.001568	0.005117	0.03725	-0.009184	0.046011	0.046011
183.5	0.003501	0.005075	0.030581	-0.006298	0.036648	0.036648
184.5	0.002169	0.00652	0.024254	-0.002913	0.027088	0.027088
185.5	0.001328	0.00688	0.019328	-0.000967	0.020276	0.020276
186.5	-0.001385	0.009028	0.01811	-0.000728	0.018824	0.018824
187.5	-0.001175	0.006602	0.021893	-0.001616	0.023471	0.023471
188.5	-0.002276	0.004941	0.025265	-0.004735	0.029858	0.029858
189.5	-0.004738	0.010467	0.02967	-0.003671	0.033219	0.033219
190.5	-0.000185	0.006186	0.030655	-0.003727	0.034255	0.034255
191.5	-0.000402	-0.001753	0.031934	-0.001852	0.033723	0.033723
192.5	0.003624	-0.003915	0.03266	0.003077	0.029674	0.029674
193.5	0.002385	0.001509	0.029219	0.003648	0.025665	0.025665
194.5	-0.001016	0.001046	0.019845	0.002433	0.017454	0.017454
195.5	0.001517	-0.003835	0.008904	-0.002423	0.0113	0.0113
196.5	0.001855	-0.007605	0.004689	-0.005842	0.010469	0.010469
197.5	0.000618	-0.003596	0.007189	-0.002839	0.01	0.01
198.5	-0.000517	0.001527	0.010728	0.001966	0.008779	0.008779
199.5	0.004064	0.00271	0.011249	0.004141	0.007138	0.007138
200.5	0.000999	-0.001824	0.004848	0.003699	0.001153	0.001153
201.5	-0.00237	-0.004565	-0.000991	0.00286	-0.003861	-0.003861
202.5	-0.001851	-0.000952	-0.003345	0.003239	-0.006606	-0.006606
203.5	0.001149	0.003114	-0.001332	0.004306	-0.005663	-0.005663
204.5	0.000474	-0.00135	0.000418	0.001898	-0.001483	-0.001483
205.5	-0.000308	-0.006285	0.003046	0.003032	1.4e-05	1.4e-05
206.5	-0.001161	-0.002078	0.007124	0.002903	0.004233	0.004233
207.5	-0.000823	0.00031	0.009763	0.007154	0.002628	0.002628
208.5	0.001273	-0.004645	0.01293	0.011007	0.001944	0.001944
209.5	0.000927	-0.00276	0.014028	0.011238	0.002821	0.002821
210.5	-0.000602	0.003797	0.012718	0.006008	0.006751	0.006751
211.5	0.00107	0.005944	0.011358	0.001078	0.010291	0.010291
212.5	0.002515	0.005386	0.007901	-0.006251	0.014064	0.014064
213.5	0.00149	0.000732	0.003352	-0.010457	0.013667	0.013667
214.5	-0.002596	-0.004147	-0.001655	-0.010065	0.008327	0.008327
215.5	-0.000617	-0.003351	-0.005899	-0.006072	0.000172	0.000172
216.5	-0.001017	-0.001828	-0.008069	-0.002006	-0.006051	-0.006051
217.5	-0.000541	-0.000651	-0.009413	-0.000358	-0.009052	-0.009052
218.5	-0.000634	0.003496	-0.007956	-0.002896	-0.005046	-0.005046
219.5	0.00035	0.006119	-0.006235	-0.006374	0.000139	0.000139
220.5	0.002105	0.004801	-0.004221	-0.005544	0.001315	0.001315
221.5	-0.000827	0.003641	-0.003317	-0.002128	-0.001186	-0.001186
222.5	0.001395	0.003042	-0.002892	-1.5e-05	-0.002876	-0.002876
223.5	-0.000647	0.001332	-0.002056	-0.001023	-0.001032	-0.001032
224.5	0.001085	-0.000144	0.001119	-0.000428	0.001545	0.001545
225.5	-0.000713	-0.006631	0.003686	0.000447	0.003241	0.003241
226.5	-0.001434	-0.006177	0.00378	0.000289	0.003492	0.003492
227.5	-0.000273	-0.000991	0.003789	0.001745	0.002047	0.002047
228.5	0.001073	0.005281	0.005506	-0.000154	0.005659	0.005659
229.5	-0.002083	0.004828	0.007527	0.000686	0.006846	0.006846
230.5	5.9e-05	0.003598	0.005756	0.000754	0.005005	0.005005
231.5	-0.000508	0.002326	0.002675	0.002506	0.000169	0.000169
232.5	-0.001924	-0.000876	-0.002254	0.002394	-0.004659	-0.004659
233.5	0.000984	0.00019	-0.002064	0.00325	-0.005331	-0.005331
234.5	0.002196	0.00522	0.001483	0.003619	-0.002144	-0.002144
235.5	3e-05	0.010092	0.004807	0.006933	-0.00214	-0.00214
236.5	0.000316	0.007486	0.003452	0.010754	-0.007381	-0.007381
237.5	0.00124	-0.000886	-0.00077	0.012954	-0.013904	-0.013904
238.5	-0.001199	-0.002269	-0.008034	0.015003	-0.023387	-0.023387
239.5	-0.000767	-0.000198	-0.013215	0.01314	-0.026706	-0.026706
240.5	0.000526	-0.000725	-0.016825	0.00962	-0.026702	-0.026702
241.5	0.000827	-0.003855	-0.0169	0.00536	-0.022379	-0.022379
242.5	0.001607	-0.002363	-0.014308	0.004933	-0.019337	-0.019337
243.5	-2.8e-05	0.004708	-0.013287	0.003532	-0.016879	-0.016879
244.5	0.000358	0.003953	-0.013573	0.003913	-0.017555	-0.017555
245.5	0.000958	0.002399	-0.009505	0.005224	-0.014806	-0.014806
246.5	-0.002	0.000923	-0.004589	0.007553	-0.012234	-0.012234
247.5	0.001974	-0.00094	0.003122	0.009371	-0.006308	-0.006308
248.5	0.000959	0.00015	0.008942	0.009107	-0.000166	-0.000166
249.5	-0.000687	0.003581	0.011496	0.007999	0.003526	0.003526
250.5	-0.000554	0.000411	0.010616	0.006685	0.003958	0.003958
251.5	-0.001135	-0.002379	0.007623	0.007093	0.000535	0.000535
252.5	0.000379	-0.002004	0.004466	0.008092	-0.003656	-0.003656
253.5	-0.00016	-0.001994	0.000879	0.00909	-0.008287	-0.008287

## Sheet: SF_Epop_50s
wave_number	fsc_nomask	fsc_loosemask	fsc_tightmask	fsc_noisesub_raw	fsc_noisesub_true	fsc_noisesub
0.5	1	1	1	1	nan	1
1.5	0.999953	0.999997	1	0.999999	0.111111	1
2.5	0.999944	0.99999	0.999998	0.999998	0.096774	0.999998
3.5	0.999812	0.999964	0.999993	0.999993	0.03252	0.999993
4.5	0.99961	0.999958	0.999984	0.999982	0.064407	0.999984
5.5	0.999418	0.999951	0.999968	0.999967	0.039568	0.999968
6.5	0.999241	0.999937	0.999946	0.999948	-0.041522	0.999946
7.5	0.998806	0.999887	0.999923	0.999925	-0.027049	0.999923
8.5	0.998265	0.999844	0.999878	0.999882	-0.032895	0.999878
9.5	0.998657	0.999873	0.999901	0.999902	-0.008495	0.999901
10.5	0.998423	0.999844	0.999897	0.999896	0.01431	0.999897
11.5	0.997664	0.99977	0.999868	0.999868	0.003605	0.999868
12.5	0.997741	0.999748	0.999861	0.999861	-0.001286	0.999861
13.5	0.997563	0.999707	0.999842	0.999839	0.018539	0.999842
14.5	0.99755	0.999715	0.999856	0.999853	0.019425	0.999856
15.5	0.997154	0.999692	0.999847	0.999842	0.026833	0.999847
16.5	0.996339	0.99958	0.999831	0.999825	0.03433	0.999831
17.5	0.995389	0.999502	0.999804	0.9998	0.017313	0.999804
18.5	0.994213	0.999444	0.999789	0.999789	0.000849	0.999789
19.5	0.992198	0.999253	0.999748	0.999747	0.002831	0.999748
20.5	0.989109	0.998927	0.999673	0.999675	-0.006978	0.999673
21.5	0.984159	0.998398	0.999565	0.999559	0.013656	0.999565
22.5	0.981601	0.997983	0.99947	0.999465	0.010574	0.99947
23.5	0.980172	0.99772	0.999356	0.999347	0.013876	0.999356
24.5	0.975028	0.997279	0.999228	0.999221	0.008871	0.999228
25.5	0.971652	0.996944	0.999166	0.999166	0.000214	0.999166
26.5	0.970933	0.996763	0.999109	0.999113	-0.005109	0.999109
27.5	0.969424	0.996571	0.999019	0.999038	-0.020451	0.999019
28.5	0.966246	0.996032	0.998843	0.998854	-0.008734	0.998843
29.5	0.962214	0.995695	0.998729	0.998728	0.001312	0.998729
30.5	0.958704	0.995511	0.998677	0.998677	-0.00018	0.998677
31.5	0.955978	0.995217	0.998678	0.998686	-0.006031	0.998678
32.5	0.952762	0.994745	0.998549	0.998564	-0.010668	0.998549
33.5	0.953211	0.994514	0.998396	0.998399	-0.001452	0.998396
34.5	0.953593	0.994576	0.998414	0.99841	0.001912	0.998414
35.5	0.950277	0.994433	0.998437	0.99843	0.004479	0.998437
36.5	0.948879	0.994199	0.998419	0.998413	0.003832	0.998419
37.5	0.946209	0.994121	0.998398	0.998387	0.006911	0.998398
38.5	0.94276	0.993647	0.998313	0.998309	0.002538	0.998313
39.5	0.936975	0.992991	0.998052	0.998053	-0.000521	0.998052
40.5	0.930554	0.991971	0.997692	0.9977	-0.003395	0.997692
41.5	0.927296	0.991425	0.99755	0.997573	-0.009382	0.99755
42.5	0.921988	0.991156	0.997525	0.997542	-0.006789	0.997525
43.5	0.916476	0.990377	0.997345	0.997343	0.000628	0.997345
44.5	0.907394	0.989405	0.997007	0.997017	-0.003557	0.997007
45.5	0.895389	0.988497	0.996699	0.996718	-0.005629	0.996699
46.5	0.889153	0.987319	0.996415	0.996444	-0.007961	0.996415
47.5	0.879102	0.986368	0.996152	0.996174	-0.005717	0.996152
48.5	0.873697	0.985495	0.996056	0.996057	-0.000438	0.996056
49.5	0.871229	0.984954	0.995903	0.995911	-0.002143	0.995903
50.5	0.862363	0.9839	0.99569	0.995717	-0.006262	0.99569
51.5	0.852699	0.982719	0.995367	0.99541	-0.009506	0.995367
52.5	0.848235	0.982065	0.995113	0.995129	-0.003341	0.995113
53.5	0.843211	0.981637	0.994999	0.995006	-0.001576	0.994999
54.5	0.843499	0.981369	0.994878	0.99489	-0.002426	0.994878
55.5	0.83908	0.980786	0.994709	0.994702	0.001361	0.994709
56.5	0.832816	0.980403	0.994535	0.994506	0.005175	0.994535
57.5	0.824578	0.979009	0.994313	0.994291	0.003821	0.994313
58.5	0.815448	0.977689	0.993913	0.993899	0.002442	0.993913
59.5	0.806598	0.976504	0.993503	0.993473	0.004584	0.993503
60.5	0.804224	0.975169	0.993104	0.993101	0.000415	0.993104
61.5	0.795119	0.974133	0.992586	0.992601	-0.001901	0.992586
62.5	0.780508	0.972413	0.991945	0.991943	0.000281	0.991945
63.5	0.771646	0.970892	0.991702	0.99167	0.003892	0.991702
64.5	0.75761	0.970353	0.991535	0.991499	0.004249	0.991535
65.5	0.753413	0.969236	0.99146	0.991464	-0.000475	0.99146
66.5	0.747817	0.968869	0.991121	0.991127	-0.000712	0.991121
67.5	0.740365	0.968172	0.990721	0.990685	0.003833	0.990721
68.5	0.740638	0.967093	0.990486	0.990408	0.008196	0.990486
69.5	0.73878	0.966356	0.990509	0.990438	0.00743	0.990509
70.5	0.737142	0.967016	0.990634	0.99061	0.002457	0.990634
71.5	0.742692	0.967283	0.990848	0.990843	0.000508	0.990848
72.5	0.741315	0.96703	0.990922	0.990897	0.002672	0.990922
73.5	0.735184	0.966616	0.990525	0.990539	-0.001537	0.990525
74.5	0.728005	0.96578	0.990138	0.990182	-0.004523	0.990138
75.5	0.720417	0.964525	0.989898	0.989914	-0.001525	0.989898
76.5	0.721443	0.963922	0.989903	0.989897	0.000584	0.989903
77.5	0.717379	0.963403	0.989808	0.98977	0.003712	0.989808
78.5	0.713235	0.963109	0.989709	0.989653	0.005358	0.989709
79.5	0.711229	0.963252	0.98957	0.989523	0.004506	0.98957
80.5	0.708227	0.96223	0.989313	0.989258	0.005144	0.989313
81.5	0.701993	0.961409	0.989158	0.989114	0.004123	0.989158
82.5	0.694329	0.960371	0.988988	0.988982	0.00053	0.988988
83.5	0.688312	0.959856	0.988742	0.988788	-0.004147	0.988742
84.5	0.68455	0.959541	0.988451	0.988544	-0.008138	0.988451
85.5	0.683587	0.959068	0.988194	0.988245	-0.00434	0.988194
86.5	0.682011	0.958791	0.988073	0.988033	0.003322	0.988073
87.5	0.673103	0.957078	0.987611	0.987566	0.003586	0.987611
88.5	0.660608	0.954273	0.987058	0.987012	0.003511	0.987058
89.5	0.655298	0.953365	0.986885	0.98688	0.000427	0.986885
90.5	0.6531	0.952958	0.986735	0.986747	-0.000922	0.986735
91.5	0.646434	0.951357	0.986094	0.986104	-0.000755	0.986094
92.5	0.642917	0.950022	0.985412	0.985381	0.002112	0.985412
93.5	0.633215	0.949453	0.985197	0.985122	0.005088	0.985197
94.5	0.623441	0.948274	0.985097	0.985065	0.002135	0.985097
95.5	0.612494	0.945786	0.984564	0.984519	0.002872	0.984564
96.5	0.596463	0.942265	0.983539	0.983431	0.006519	0.983539
97.5	0.590123	0.939793	0.982754	0.982549	0.011726	0.982754
98.5	0.581059	0.939072	0.982534	0.982352	0.010278	0.982534
99.5	0.57719	0.938133	0.981965	0.981834	0.007245	0.981965
100.5	0.564342	0.934852	0.981042	0.980967	0.00398	0.981042
101.5	0.55403	0.932163	0.980142	0.980099	0.002156	0.980142
102.5	0.545598	0.930403	0.979477	0.979434	0.002095	0.979477
103.5	0.53294	0.927874	0.978862	0.978816	0.002189	0.978862
104.5	0.520884	0.924342	0.977925	0.977819	0.004789	0.977925
105.5	0.504999	0.920585	0.976548	0.97637	0.007524	0.976548
106.5	0.497623	0.917614	0.975607	0.975411	0.007951	0.975607
107.5	0.488199	0.916646	0.975185	0.974941	0.009719	0.975185
108.5	0.481529	0.915727	0.97449	0.974128	0.014021	0.97449
109.5	0.473129	0.911978	0.973425	0.973031	0.014605	0.973425
110.5	0.458001	0.907963	0.972271	0.971832	0.015566	0.972271
111.5	0.441527	0.902514	0.970687	0.970195	0.016496	0.970687
112.5	0.432242	0.89701	0.96906	0.968711	0.011131	0.96906
113.5	0.41761	0.893069	0.968202	0.967885	0.009898	0.968202
114.5	0.412187	0.891251	0.967693	0.967265	0.013063	0.967693
115.5	0.405505	0.887722	0.966618	0.966273	0.010225	0.966618
116.5	0.391686	0.883103	0.964425	0.964161	0.007366	0.964425
117.5	0.379805	0.878612	0.962635	0.962359	0.007335	0.962635
118.5	0.366523	0.873668	0.961177	0.960757	0.010707	0.961177
119.5	0.357819	0.870449	0.959929	0.959416	0.012653	0.959929
120.5	0.349861	0.867154	0.958726	0.958158	0.01356	0.958726
121.5	0.33966	0.860563	0.956673	0.956042	0.01435	0.956673
122.5	0.330842	0.856113	0.955007	0.954516	0.010806	0.955007
123.5	0.320905	0.851517	0.953439	0.95317	0.00574	0.953439
124.5	0.319328	0.847006	0.951699	0.951256	0.009088	0.951699
125.5	0.306376	0.842601	0.949807	0.948928	0.017207	0.949807
126.5	0.301267	0.838502	0.948389	0.947297	0.020727	0.948389
127.5	0.288981	0.834294	0.946768	0.94525	0.027732	0.946768
128.5	0.281691	0.827007	0.944067	0.941753	0.039724	0.944067
129.5	0.273891	0.819565	0.940866	0.937842	0.048655	0.940866
130.5	0.258301	0.809383	0.937519	0.933976	0.053663	0.937519
131.5	0.243077	0.798861	0.933359	0.929008	0.06128	0.933359
132.5	0.234451	0.790395	0.92897	0.924138	0.063702	0.92897
133.5	0.219242	0.778169	0.923575	0.918309	0.064466	0.923575
134.5	0.208534	0.763609	0.91906	0.912079	0.079406	0.91906
135.5	0.189983	0.744569	0.912051	0.902113	0.101527	0.912051
136.5	0.173919	0.724939	0.903239	0.883133	0.172043	0.903239
137.5	0.160899	0.704827	0.894088	0.835988	0.354241	0.894088
138.5	0.145547	0.682352	0.883757	0.711485	0.597098	0.883757
139.5	0.127408	0.656254	0.871854	0.462695	0.761502	0.871854
140.5	0.119861	0.629718	0.859389	0.245416	0.813658	0.813658
141.5	0.10736	0.60252	0.845881	0.175229	0.813137	0.813137
142.5	0.092399	0.570095	0.830111	0.145932	0.801082	0.801082
143.5	0.087523	0.545545	0.813347	0.127083	0.786173	0.786173
144.5	0.079749	0.521586	0.79941	0.107714	0.775195	0.775195
145.5	0.068711	0.492621	0.783851	0.095413	0.761052	0.761052
146.5	0.064736	0.461019	0.762414	0.086522	0.73991	0.73991
147.5	0.054322	0.437345	0.738968	0.079408	0.716452	0.716452
148.5	0.051399	0.406718	0.716431	0.067197	0.696003	0.696003
149.5	0.045987	0.378762	0.697761	0.06406	0.677074	0.677074
150.5	0.041112	0.360572	0.681192	0.060793	0.660556	0.660556
151.5	0.034939	0.343567	0.662002	0.045837	0.645765	0.645765
152.5	0.038588	0.324135	0.643044	0.03493	0.630125	0.630125
153.5	0.033947	0.309259	0.623401	0.033532	0.610334	0.610334
154.5	0.032762	0.288062	0.601224	0.035347	0.586612	0.586612
155.5	0.025409	0.267906	0.578359	0.036755	0.56227	0.56227
156.5	0.021553	0.253557	0.560394	0.036336	0.543818	0.543818
157.5	0.022895	0.238115	0.54197	0.03291	0.526384	0.526384
158.5	0.022762	0.22439	0.52211	0.033398	0.505598	0.505598
159.5	0.019966	0.211697	0.500897	0.029366	0.485797	0.485797
160.5	0.019093	0.199374	0.481861	0.024464	0.468867	0.468867
161.5	0.01701	0.188552	0.461558	0.02494	0.447785	0.447785
162.5	0.01904	0.175616	0.443404	0.025518	0.428829	0.428829
163.5	0.013175	0.163093	0.429088	0.022318	0.416056	0.416056
164.5	0.013386	0.152328	0.412911	0.01908	0.401491	0.401491
165.5	0.010076	0.138472	0.394325	0.013076	0.386301	0.386301
166.5	0.011787	0.133704	0.372843	0.007535	0.368082	0.368082
167.5	0.008821	0.125548	0.355588	0.004323	0.35279	0.35279
168.5	0.008448	0.119329	0.340445	-0.002204	0.341896	0.341896
169.5	0.008523	0.111386	0.325636	-0.007251	0.330491	0.330491
170.5	0.007092	0.101693	0.309142	-0.00303	0.311229	0.311229
171.5	0.009253	0.091623	0.28981	0.003406	0.287383	0.287383
172.5	0.006323	0.08289	0.273781	0.002858	0.2717	0.2717
173.5	0.006587	0.084895	0.267598	-0.007649	0.273157	0.273157
174.5	0.007136	0.081672	0.256608	-0.011125	0.264787	0.264787
175.5	0.004128	0.069685	0.236173	-0.003898	0.239139	0.239139
176.5	0.004349	0.064102	0.215616	0.004361	0.21218	0.21218
177.5	0.002573	0.062054	0.200238	0.009664	0.192434	0.192434
178.5	0.008153	0.056137	0.188757	0.010197	0.1804	0.1804
179.5	0.003726	0.05312	0.176651	0.002923	0.174238	0.174238
180.5	0.001077	0.045372	0.164808	-0.002004	0.166479	0.166479
181.5	0.002999	0.040492	0.157978	-0.004047	0.161372	0.161372
182.5	-0.001313	0.037593	0.151989	-0.001328	0.153114	0.153114
183.5	-0.000549	0.038431	0.143089	0.004928	0.138845	0.138845
184.5	0.003274	0.027626	0.129807	0.009707	0.121278	0.121278
185.5	0.003068	0.026581	0.121725	0.007244	0.115317	0.115317
186.5	-0.000879	0.02824	0.115221	0.005165	0.110628	0.110628
187.5	-0.000599	0.026862	0.1063	0.002818	0.103774	0.103774
188.5	-0.000672	0.026451	0.096441	0.000822	0.095697	0.095697
189.5	-0.00052	0.023665	0.08808	0.001199	0.086985	0.086985
190.5	0.001053	0.021375	0.08412	0.001812	0.082458	0.082458
191.5	-0.000771	0.019293	0.078643	0.004342	0.074626	0.074626
192.5	-0.00051	0.01806	0.06906	0.005694	0.063729	0.063729
193.5	0.003582	0.014517	0.061179	0.000645	0.060573	0.060573
194.5	-0.000524	0.01414	0.057953	-0.001988	0.059822	0.059822
195.5	-0.000494	0.010775	0.049378	-0.001301	0.050614	0.050614
196.5	-0.001718	0.010226	0.043222	-0.000125	0.043341	0.043341
197.5	0.0038	0.01373	0.043674	0.00256	0.041219	0.041219
198.5	0.00185	0.012528	0.043453	0.003552	0.040043	0.040043
199.5	-0.000704	0.008853	0.042939	0.002109	0.040917	0.040917
200.5	0.002215	0.005665	0.036615	0.000667	0.035972	0.035972
201.5	0.000371	0.007042	0.02895	0.001027	0.027951	0.027951
202.5	-0.002757	0.010292	0.026601	0.00205	0.024602	0.024602
203.5	-0.000294	0.00974	0.025952	-0.003627	0.029472	0.029472
204.5	0.001978	0.008234	0.024362	-0.002461	0.026757	0.026757
205.5	-0.001504	0.010281	0.019002	0.003922	0.01514	0.01514
206.5	-0.000546	0.007272	0.018239	0.004813	0.013491	0.013491
207.5	0.000233	0.007273	0.015955	-0.001043	0.016981	0.016981
208.5	-0.000775	0.009829	0.013551	-0.001055	0.01459	0.01459
209.5	0.001512	0.003937	0.011889	-0.001268	0.01314	0.01314
210.5	0.001294	0.002549	0.005985	-0.003425	0.009377	0.009377
211.5	0.00134	0.003265	0.004076	-0.010241	0.014173	0.014173
212.5	-0.001469	0.002265	0.004272	-0.009132	0.013282	0.013282
213.5	0.002794	0.002282	0.006489	-0.002208	0.008678	0.008678
214.5	0.001328	-0.00052	0.007769	0.002406	0.005375	0.005375
215.5	0.000931	-0.003865	0.006143	0.004644	0.001506	0.001506
216.5	0.001982	-0.003635	0.001574	0.002109	-0.000536	-0.000536
217.5	0.001153	-0.003234	-0.002585	-0.001821	-0.000763	-0.000763
218.5	0.000543	-0.000458	-0.004214	-0.002457	-0.001753	-0.001753
219.5	-0.000408	-0.00625	-0.006427	-0.000875	-0.005547	-0.005547
220.5	-0.001146	-0.010209	-0.005933	0.001593	-0.007538	-0.007538
221.5	0.00054	-0.007175	-0.002846	0.001934	-0.004789	-0.004789
222.5	-0.000402	-0.001032	0.001599	-0.000706	0.002303	0.002303
223.5	0.000419	0.000885	0.000129	-0.003201	0.00332	0.00332
224.5	0.001012	0.00011	-0.000761	-0.00284	0.002074	0.002074
225.5	0.000129	-0.000551	-0.002107	-0.002496	0.000388	0.000388
226.5	-0.000806	0.001449	-0.003244	-0.002142	-0.0011	-0.0011
227.5	0.001585	-0.00125	-0.005978	-0.00312	-0.00285	-0.00285
228.5	-0.001905	-0.004161	-0.004648	-0.000175	-0.004473	-0.004473
229.5	-0.000388	0.002422	-0.000522	0.001423	-0.001947	-0.001947
230.5	-0.001391	0.003596	0.00383	0.00151	0.002323	0.002323
231.5	-0.001469	2.4e-05	0.003012	0.003093	-8.1e-05	-8.1e-05
232.5	0.00032	-0.001564	-0.000694	0.005787	-0.006519	-0.006519
233.5	0.001539	-0.002475	-0.005018	0.008629	-0.013766	-0.013766
234.5	0.000788	-0.001005	-0.005141	0.008767	-0.014031	-0.014031
235.5	0.000797	0.002418	-0.002949	0.004367	-0.007349	-0.007349
236.5	0.000112	0.001241	0.000692	-0.000433	0.001124	0.001124
237.5	0.00195	0.000785	0.001376	0.001155	0.000222	0.000222
238.5	0.000506	-0.000836	0.001301	0.002637	-0.00134	-0.00134
239.5	0.000596	-0.000116	0.000242	0.001491	-0.001251	-0.001251
240.5	0.00028	0.00095	0.000798	-0.001374	0.00217	0.00217
241.5	0.001387	0.001636	0.001001	-0.003268	0.004255	0.004255
242.5	0.000394	0.002921	0.000433	0.001532	-0.0011	-0.0011
243.5	-0.001864	0.002608	-0.001021	0.004116	-0.005159	-0.005159
244.5	-0.000679	0.003903	-0.002223	0.005984	-0.008256	-0.008256
245.5	-7e-05	0.00378	-0.000668	0.008258	-0.009	-0.009
246.5	0.001301	0.004689	0.001431	0.009404	-0.008049	-0.008049
247.5	3.9e-05	0.005942	0.003394	0.008777	-0.005431	-0.005431
248.5	0.003019	0.001598	0.002359	0.005876	-0.003539	-0.003539
249.5	-0.001096	-0.000682	0.00079	0.000393	0.000397	0.000397
250.5	0.001936	0.001435	0.005406	-0.001562	0.006957	0.006957
251.5	-0.000296	0.002854	0.008896	-0.001643	0.010521	0.010521
252.5	-0.000244	-5e-05	0.005398	0.00038	0.005019	0.005019
253.5	-0.000756	-0.001947	-0.001118	0.000295	-0.001414	-0.001414

## Sheet: SF_Epop_30s_core
wave_number	fsc_nomask	fsc_loosemask	fsc_tightmask	fsc_noisesub_raw	fsc_noisesub_true	fsc_noisesub
0.5	1	1	1	1	nan	1
1.5	0.99995	0.999998	1	1	0	1
2.5	0.999944	0.999991	0.999999	0.999999	-0.4	0.999999
3.5	0.999765	0.999978	0.999996	0.999998	-0.512821	0.999996
4.5	0.999613	0.999971	0.999992	0.999994	-0.343434	0.999992
5.5	0.999352	0.999969	0.999987	0.999989	-0.191011	0.999987
6.5	0.999046	0.999938	0.999979	0.999981	-0.154341	0.999979
7.5	0.998443	0.999896	0.999967	0.99997	-0.108	0.999967
8.5	0.997957	0.999843	0.999945	0.999948	-0.062212	0.999945
9.5	0.9982	0.999849	0.999915	0.999916	-0.015692	0.999915
10.5	0.997954	0.999831	0.999875	0.999878	-0.020518	0.999875
11.5	0.997137	0.99971	0.999843	0.999844	-0.00343	0.999843
12.5	0.996906	0.9996	0.999825	0.999826	-0.007874	0.999825
13.5	0.996412	0.999636	0.99983	0.999835	-0.030642	0.99983
14.5	0.996726	0.999686	0.999842	0.999846	-0.023938	0.999842
15.5	0.996025	0.999624	0.999852	0.999851	0.011568	0.999852
16.5	0.994928	0.999488	0.999831	0.999824	0.03897	0.999831
17.5	0.993471	0.999432	0.999788	0.999777	0.04893	0.999788
18.5	0.991505	0.999278	0.999753	0.999737	0.058783	0.999753
19.5	0.988666	0.999023	0.9997	0.999688	0.03877	0.9997
20.5	0.983666	0.998677	0.999611	0.9996	0.027683	0.999611
21.5	0.974052	0.998074	0.999484	0.999476	0.013773	0.999484
22.5	0.967492	0.997242	0.999334	0.999335	-0.000986	0.999334
23.5	0.967665	0.99685	0.999201	0.999196	0.005265	0.999201
24.5	0.960972	0.996652	0.999103	0.99909	0.014862	0.999103
25.5	0.956199	0.996266	0.999035	0.999033	0.001849	0.999035
26.5	0.952145	0.995848	0.998987	0.999002	-0.014452	0.998987
27.5	0.949611	0.995349	0.998902	0.998931	-0.026703	0.998902
28.5	0.945703	0.995075	0.998797	0.998834	-0.032103	0.998797
29.5	0.938417	0.994776	0.998647	0.998679	-0.023866	0.998647
30.5	0.93256	0.994502	0.998568	0.998577	-0.006032	0.998568
31.5	0.928839	0.994232	0.998557	0.998557	0.000289	0.998557
32.5	0.925565	0.993907	0.998479	0.998491	-0.007782	0.998479
33.5	0.922848	0.993602	0.998352	0.998377	-0.014981	0.998352
34.5	0.925531	0.993414	0.998244	0.99827	-0.014779	0.998244
35.5	0.915818	0.993012	0.998187	0.998204	-0.009659	0.998187
36.5	0.910243	0.992627	0.998115	0.99813	-0.008224	0.998115
37.5	0.904372	0.992342	0.998067	0.998078	-0.00611	0.998067
38.5	0.896636	0.992011	0.998042	0.998066	-0.012698	0.998042
39.5	0.89236	0.991704	0.997942	0.99798	-0.018409	0.997942
40.5	0.880923	0.991033	0.997713	0.997754	-0.018148	0.997713
41.5	0.873882	0.989754	0.997382	0.997403	-0.007918	0.997382
42.5	0.859826	0.988348	0.997001	0.997026	-0.008437	0.997001
43.5	0.847709	0.987274	0.996749	0.996787	-0.011649	0.996749
44.5	0.829004	0.985608	0.996402	0.996431	-0.008335	0.996402
45.5	0.805684	0.983777	0.995955	0.99597	-0.003564	0.995955
46.5	0.788947	0.982327	0.99545	0.995448	0.000419	0.99545
47.5	0.767842	0.98006	0.994837	0.994838	-0.000185	0.994837
48.5	0.754101	0.977906	0.994362	0.994365	-0.000518	0.994362
49.5	0.753947	0.977722	0.994162	0.994199	-0.006453	0.994162
50.5	0.747916	0.978374	0.994213	0.994245	-0.005603	0.994213
51.5	0.736482	0.97777	0.99423	0.994228	0.000279	0.99423
52.5	0.723914	0.976039	0.994223	0.994213	0.001679	0.994223
53.5	0.709648	0.974014	0.993962	0.993938	0.003874	0.993962
54.5	0.69932	0.97284	0.993445	0.993407	0.005786	0.993445
55.5	0.688502	0.971821	0.992954	0.992861	0.013049	0.992954
56.5	0.683508	0.970651	0.992752	0.992619	0.018041	0.992752
57.5	0.668621	0.969532	0.992351	0.992197	0.019747	0.992351
58.5	0.657968	0.968513	0.991835	0.991708	0.015383	0.991835
59.5	0.647398	0.966917	0.991537	0.991413	0.014438	0.991537
60.5	0.638964	0.964925	0.991127	0.990998	0.014328	0.991127
61.5	0.621918	0.96296	0.99065	0.990541	0.011582	0.99065
62.5	0.59994	0.959945	0.990181	0.990047	0.013403	0.990181
63.5	0.575234	0.95553	0.989167	0.989052	0.010545	0.989167
64.5	0.548954	0.952119	0.98792	0.98781	0.009026	0.98792
65.5	0.540837	0.94899	0.986821	0.986746	0.005648	0.986821
66.5	0.527819	0.946535	0.985992	0.985974	0.001326	0.985992
67.5	0.514833	0.94579	0.985431	0.985423	0.000597	0.985431
68.5	0.509094	0.945087	0.985039	0.984998	0.00269	0.985039
69.5	0.504908	0.944123	0.985045	0.98496	0.005651	0.985045
70.5	0.505499	0.943047	0.985165	0.985091	0.004961	0.985165
71.5	0.50259	0.942757	0.985153	0.985034	0.007953	0.985153
72.5	0.508234	0.942526	0.985047	0.98489	0.010418	0.985047
73.5	0.492748	0.940731	0.985179	0.985091	0.005881	0.985179
74.5	0.48749	0.940719	0.985334	0.985395	-0.004138	0.985334
75.5	0.479388	0.940975	0.98533	0.98547	-0.009623	0.98533
76.5	0.476594	0.940435	0.984788	0.984923	-0.008966	0.984788
77.5	0.471758	0.938311	0.984122	0.984164	-0.002635	0.984122
78.5	0.459627	0.935555	0.983374	0.983351	0.001386	0.983374
79.5	0.447425	0.932018	0.982504	0.98247	0.001955	0.982504
80.5	0.443137	0.929853	0.981833	0.98186	-0.001531	0.981833
81.5	0.44099	0.930479	0.981467	0.981499	-0.001733	0.981467
82.5	0.431813	0.930346	0.98134	0.981366	-0.001343	0.98134
83.5	0.431666	0.928541	0.981218	0.981229	-0.000587	0.981218
84.5	0.421634	0.926057	0.980956	0.98098	-0.001275	0.980956
85.5	0.411004	0.924396	0.980717	0.980694	0.001192	0.980717
86.5	0.407122	0.923508	0.980154	0.980147	0.000345	0.980154
87.5	0.40589	0.921699	0.979412	0.979423	-0.000507	0.979412
88.5	0.391065	0.919177	0.978816	0.978864	-0.002262	0.978816
89.5	0.380403	0.916344	0.978454	0.978431	0.001103	0.978454
90.5	0.366729	0.912162	0.977838	0.977769	0.003091	0.977838
91.5	0.35207	0.908146	0.977094	0.977029	0.002805	0.977094
92.5	0.348582	0.905358	0.976447	0.97625	0.008302	0.976447
93.5	0.343448	0.904008	0.975654	0.975395	0.010523	0.975654
94.5	0.339826	0.90373	0.974935	0.974693	0.009576	0.974935
95.5	0.332472	0.900321	0.97392	0.973761	0.00607	0.97392
96.5	0.313862	0.894217	0.972375	0.972357	0.000649	0.972375
97.5	0.301838	0.888834	0.970245	0.970416	-0.005801	0.970245
98.5	0.286775	0.882907	0.968212	0.968595	-0.01219	0.968212
99.5	0.279596	0.877829	0.966608	0.966943	-0.010144	0.966608
100.5	0.269975	0.874708	0.965991	0.965863	0.003754	0.965991
101.5	0.26906	0.871627	0.965656	0.965045	0.017492	0.965656
102.5	0.261409	0.86802	0.964919	0.964273	0.018093	0.964919
103.5	0.250855	0.8615	0.963337	0.962697	0.017163	0.963337
104.5	0.241312	0.85611	0.961707	0.960819	0.022656	0.961707
105.5	0.231687	0.850843	0.959447	0.958223	0.029284	0.959447
106.5	0.218151	0.842876	0.957126	0.955589	0.034624	0.957126
107.5	0.209809	0.836825	0.955292	0.95345	0.039572	0.955292
108.5	0.205191	0.831191	0.953757	0.951714	0.042302	0.953757
109.5	0.193063	0.823832	0.951536	0.948752	0.054316	0.951536
110.5	0.181903	0.815056	0.948781	0.945124	0.066639	0.948781
111.5	0.172065	0.808851	0.945613	0.94144	0.071274	0.945613
112.5	0.173156	0.801119	0.942674	0.937597	0.081359	0.942674
113.5	0.169545	0.789531	0.940196	0.933705	0.097914	0.940196
114.5	0.150233	0.779757	0.937478	0.927552	0.137019	0.937478
115.5	0.152107	0.774661	0.935535	0.916238	0.230375	0.935535
116.5	0.146423	0.770652	0.933362	0.890591	0.390924	0.933362
117.5	0.140734	0.760806	0.930155	0.827342	0.595472	0.930155
118.5	0.13039	0.747657	0.92642	0.685213	0.766255	0.92642
119.5	0.127021	0.739518	0.922592	0.469493	0.854086	0.854086
120.5	0.121766	0.732794	0.919212	0.31363	0.882296	0.882296
121.5	0.121037	0.726134	0.917649	0.246856	0.890657	0.890657
122.5	0.1128	0.71933	0.915118	0.207617	0.892877	0.892877
123.5	0.105961	0.711709	0.912217	0.17928	0.893041	0.893041
124.5	0.10239	0.700358	0.907741	0.155539	0.890748	0.890748
125.5	0.100751	0.69191	0.903609	0.136298	0.888398	0.888398
126.5	0.090798	0.686502	0.899552	0.119986	0.885857	0.885857
127.5	0.094167	0.679671	0.895333	0.109425	0.882473	0.882473
128.5	0.087466	0.669464	0.890357	0.101998	0.877903	0.877903
129.5	0.076937	0.653276	0.88545	0.08967	0.874167	0.874167
130.5	0.076885	0.635301	0.880989	0.07181	0.871781	0.871781
131.5	0.073241	0.62106	0.876103	0.063843	0.867654	0.867654
132.5	0.07077	0.604932	0.867713	0.064997	0.858517	0.858517
133.5	0.064022	0.588144	0.858018	0.066195	0.847953	0.847953
134.5	0.060288	0.56561	0.844797	0.06446	0.834103	0.834103
135.5	0.053749	0.540146	0.831179	0.05859	0.820672	0.820672
136.5	0.048236	0.516692	0.818349	0.047323	0.809325	0.809325
137.5	0.044702	0.489953	0.803594	0.038169	0.795799	0.795799
138.5	0.038569	0.457338	0.784667	0.033562	0.777189	0.777189
139.5	0.033336	0.423345	0.761286	0.030761	0.75371	0.75371
140.5	0.031031	0.392612	0.737089	0.027636	0.729617	0.729617
141.5	0.021068	0.353787	0.710577	0.022369	0.703955	0.703955
142.5	0.020411	0.317408	0.682441	0.020319	0.675855	0.675855
143.5	0.0162	0.288028	0.652944	0.017143	0.646891	0.646891
144.5	0.016313	0.258908	0.625478	0.01504	0.619759	0.619759
145.5	0.016514	0.235303	0.59921	0.011328	0.594617	0.594617
146.5	0.010599	0.220179	0.568941	0.013177	0.563185	0.563185
147.5	0.012177	0.202102	0.535555	0.014697	0.528627	0.528627
148.5	0.009753	0.181454	0.501902	0.018988	0.492261	0.492261
149.5	0.008355	0.162548	0.473036	0.024098	0.460023	0.460023
150.5	0.009297	0.147637	0.448666	0.019819	0.437519	0.437519
151.5	0.007676	0.137711	0.426692	0.010929	0.420357	0.420357
152.5	0.005239	0.129272	0.404262	0.00405	0.40184	0.40184
153.5	0.008114	0.116755	0.37992	0.00615	0.376083	0.376083
154.5	0.004033	0.108716	0.3544	0.010352	0.347647	0.347647
155.5	0.006279	0.100328	0.328005	0.012916	0.319212	0.319212
156.5	0.00508	0.091249	0.306963	0.00682	0.302204	0.302204
157.5	0.002077	0.08227	0.292248	0.007	0.287259	0.287259
158.5	0.003233	0.070855	0.273134	0.007887	0.267355	0.267355
159.5	0.001929	0.063578	0.252076	0.0075	0.246424	0.246424
160.5	0.000827	0.057915	0.231547	0.00546	0.227328	0.227328
161.5	0.003386	0.057683	0.214697	0.007395	0.208847	0.208847
162.5	0.001973	0.057474	0.201093	0.007538	0.195025	0.195025
163.5	0.002193	0.05176	0.18934	0.009157	0.181848	0.181848
164.5	-0.000963	0.039771	0.179607	0.004392	0.175988	0.175988
165.5	0.001096	0.034855	0.173514	0.005803	0.16869	0.16869
166.5	0.002253	0.03503	0.165456	0.006362	0.160113	0.160113
167.5	-0.000972	0.03291	0.150127	0.00592	0.145066	0.145066
168.5	0.002046	0.026739	0.136744	0.008092	0.129702	0.129702
169.5	-0.001747	0.021371	0.127309	0.004459	0.1234	0.1234
170.5	0.000246	0.01926	0.119433	-0.004297	0.123201	0.123201
171.5	0.003902	0.026642	0.106542	-0.003764	0.109892	0.109892
172.5	0.00156	0.027662	0.096788	-0.003217	0.099684	0.099684
173.5	0.000149	0.02434	0.092992	0.005793	0.087707	0.087707
174.5	0.002485	0.020714	0.088346	0.009605	0.079505	0.079505
175.5	0.001843	0.021453	0.080421	0.00868	0.072369	0.072369
176.5	-0.002613	0.023747	0.071413	0.007078	0.064793	0.064793
177.5	0.000656	0.020663	0.061945	0.001961	0.060102	0.060102
178.5	0.002271	0.01649	0.052816	-0.004518	0.057076	0.057076
179.5	0.001601	0.007277	0.046158	-0.007216	0.052992	0.052992
180.5	0.001599	0.005772	0.041268	-0.004099	0.045182	0.045182
181.5	-0.000561	0.011087	0.039184	0.000745	0.038468	0.038468
182.5	-0.001359	0.009131	0.037677	0.002993	0.034788	0.034788
183.5	0.000573	0.003975	0.035533	-0.000958	0.036456	0.036456
184.5	0.000778	0.002778	0.034128	-0.001454	0.03553	0.03553
185.5	4e-05	-0.001656	0.032443	-0.001685	0.03407	0.03407
186.5	-0.000358	-7.8e-05	0.027934	-0.001821	0.029701	0.029701
187.5	5.3e-05	0.00306	0.022766	-0.006174	0.028763	0.028763
188.5	0.001118	0.003933	0.022757	-0.008687	0.031173	0.031173
189.5	-0.000635	0.002843	0.023312	-0.004093	0.027293	0.027293
190.5	-0.000291	0.005592	0.021411	0.008356	0.013166	0.013166
191.5	0.001223	0.006327	0.018095	0.007862	0.010313	0.010313
192.5	0.001812	0.006442	0.014226	-0.000284	0.014506	0.014506
193.5	0.002897	0.007064	0.014935	-0.004921	0.019758	0.019758
194.5	-0.000464	0.004654	0.020828	-0.001605	0.022398	0.022398
195.5	0.000754	0.002888	0.027294	0.001011	0.026309	0.026309
196.5	0.000127	0.002041	0.026563	0.004973	0.021699	0.021699
197.5	0.00052	0.004698	0.019266	0.008485	0.010873	0.010873
198.5	-0.001645	0.000489	0.011701	0.005442	0.006294	0.006294
199.5	0.004372	0.001679	0.011893	3.6e-05	0.011857	0.011857
200.5	-0.003473	0.003811	0.013476	-0.004004	0.017411	0.017411
201.5	0.000124	0.005235	0.010129	-0.002912	0.013004	0.013004
202.5	-0.000807	0.004601	0.010989	0.002019	0.008988	0.008988
203.5	0.000559	0.001527	0.009573	0.008127	0.001458	0.001458
204.5	0.000892	-0.002262	0.01027	0.008363	0.001923	0.001923
205.5	0.002311	-0.001338	0.008266	0.00549	0.002792	0.002792
206.5	0.000212	0.001409	0.009164	0.003094	0.006089	0.006089
207.5	1.4e-05	0.000574	0.011146	-0.000654	0.011793	0.011793
208.5	-0.000861	0.000728	0.008194	-0.003543	0.011696	0.011696
209.5	-0.00164	0.002096	0.002576	-0.001386	0.003957	0.003957
210.5	0.001985	0.005371	0.000115	-0.000445	0.000559	0.000559
211.5	0.00052	0.003121	0.002364	0.001159	0.001206	0.001206
212.5	-0.001739	0.001147	0.002518	0.003098	-0.000582	-0.000582
213.5	0.002085	0.000783	0.001665	0.004912	-0.003263	-0.003263
214.5	0.000141	0.002981	0.002354	0.006019	-0.003687	-0.003687
215.5	0.000966	0.002141	0.002799	0.004817	-0.002028	-0.002028
216.5	0.00022	0.006839	0.003021	0.001074	0.001949	0.001949
217.5	0.002846	0.0062	0.001511	-0.003774	0.005265	0.005265
218.5	-0.001727	0.001254	0.002973	-0.006088	0.009006	0.009006
219.5	-0.000984	0.000648	0.006403	-0.007338	0.01364	0.01364
220.5	0.000113	0.002829	0.006095	-0.00085	0.006939	0.006939
221.5	-0.002566	0.001621	0.005123	0.005137	-1.4e-05	-1.4e-05
222.5	5.4e-05	0.002055	0.006815	0.00748	-0.00067	-0.00067
223.5	-0.003369	0.003873	0.007486	0.003496	0.004004	0.004004
224.5	-0.000689	0.002346	0.003458	-0.001875	0.005323	0.005323
225.5	-9.4e-05	-0.000503	-0.002418	-0.004473	0.002046	0.002046
226.5	9.6e-05	-0.003599	-0.00472	-0.001649	-0.003067	-0.003067
227.5	0.001637	-0.003549	-0.006742	0.005027	-0.011829	-0.011829
228.5	-0.002162	0.003734	-0.004055	0.00953	-0.013716	-0.013716
229.5	-0.00125	0.00493	-0.001979	0.008127	-0.010189	-0.010189
230.5	0.000378	0.002028	-0.002441	0.006371	-0.008868	-0.008868
231.5	-0.00071	-0.002453	-0.005814	0.004177	-0.010032	-0.010032
232.5	-0.000686	-0.007494	-0.006529	0.002515	-0.009066	-0.009066
233.5	-0.00152	-0.00511	-0.001997	0.002461	-0.004469	-0.004469
234.5	-0.001496	6e-06	-0.000661	-0.001488	0.000827	0.000827
235.5	0.000343	0.004715	0.003155	-1.3e-05	0.003167	0.003167
236.5	0.002849	0.001092	0.006408	0.004602	0.001814	0.001814
237.5	-0.001153	-0.004216	0.005176	0.007201	-0.00204	-0.00204
238.5	0.002074	-0.005729	0.003686	0.00808	-0.00443	-0.00443
239.5	-0.003009	-0.005118	0.005001	0.009713	-0.004758	-0.004758
240.5	-0.000172	-0.003554	0.003574	0.008166	-0.00463	-0.00463
241.5	-0.001541	-0.000264	0.002944	0.007968	-0.005065	-0.005065
242.5	-0.001469	-0.000247	0.002255	0.008204	-0.005998	-0.005998
243.5	0.001363	0.003523	0.005726	0.008038	-0.00233	-0.00233
244.5	0.00012	0.002024	0.007134	0.007471	-0.00034	-0.00034
245.5	-0.000817	0.001301	0.005238	0.008209	-0.002995	-0.002995
246.5	-0.000561	0.003009	-0.000499	0.007827	-0.008392	-0.008392
247.5	0.000616	0.001679	-0.003064	0.004181	-0.007275	-0.007275
248.5	0.000641	0.004801	-0.002507	0.001227	-0.003739	-0.003739
249.5	0.001141	0.007755	0.000702	0.00344	-0.002748	-0.002748
250.5	-0.001067	0.007032	0.005503	0.006006	-0.000507	-0.000507
251.5	0.000246	0.004799	0.009828	0.009288	0.000545	0.000545
252.5	0.000365	0.003011	0.010898	0.0073	0.003625	0.003625
253.5	0.000822	0.000119	0.005228	0.00467	0.000561	0.000561

## Sheet: SF_Epop_30s_head
wave_number	fsc_nomask	fsc_loosemask	fsc_tightmask	fsc_noisesub_raw	fsc_noisesub_true	fsc_noisesub
0.5	1	1	1	1	nan	1
1.5	0.999942	0.999999	1	1	#NAME?	1
2.5	0.999928	0.999994	1	1	0.166667	1
3.5	0.99976	0.999981	0.999999	0.999999	-0.125	0.999999
4.5	0.999589	0.99995	0.999996	0.999996	-0.014493	0.999996
5.5	0.999188	0.999901	0.99998	0.999979	0.046512	0.99998
6.5	0.998763	0.999858	0.999926	0.999918	0.091042	0.999926
7.5	0.998113	0.999831	0.999915	0.999905	0.107053	0.999915
8.5	0.997272	0.999797	0.99992	0.999913	0.080412	0.99992
9.5	0.997181	0.999767	0.99991	0.999905	0.042875	0.99991
10.5	0.996732	0.999741	0.999872	0.999873	-0.000935	0.999872
11.5	0.995279	0.999694	0.999847	0.999851	-0.027534	0.999847
12.5	0.994935	0.999654	0.999825	0.999829	-0.02155	0.999825
13.5	0.994123	0.99955	0.999788	0.999791	-0.016276	0.999788
14.5	0.993706	0.999494	0.999763	0.999766	-0.012752	0.999763
15.5	0.991981	0.99941	0.999758	0.999762	-0.014776	0.999758
16.5	0.989425	0.999328	0.999759	0.999765	-0.023327	0.999759
17.5	0.987343	0.999123	0.999759	0.99977	-0.046289	0.999759
18.5	0.982041	0.998768	0.999718	0.999728	-0.03928	0.999718
19.5	0.972698	0.998354	0.999608	0.999612	-0.008907	0.999608
20.5	0.962675	0.997857	0.999412	0.999406	0.010539	0.999412
21.5	0.94468	0.997074	0.999152	0.999151	0.001334	0.999152
22.5	0.937381	0.996277	0.998984	0.999004	-0.020528	0.998984
23.5	0.930746	0.995633	0.99889	0.998926	-0.033119	0.99889
24.5	0.914327	0.994953	0.99875	0.998787	-0.030413	0.99875
25.5	0.906193	0.994104	0.998568	0.998606	-0.026978	0.998568
26.5	0.899271	0.993791	0.998382	0.998419	-0.022839	0.998382
27.5	0.891974	0.993695	0.99836	0.998385	-0.015649	0.99836
28.5	0.888728	0.993744	0.998383	0.998387	-0.002994	0.998383
29.5	0.879636	0.993325	0.998321	0.99831	0.006489	0.998321
30.5	0.861583	0.99259	0.998223	0.998205	0.009964	0.998223
31.5	0.849611	0.991892	0.998077	0.998058	0.009912	0.998077
32.5	0.846631	0.991574	0.997997	0.997975	0.010801	0.997997
33.5	0.836505	0.991227	0.997907	0.997887	0.009451	0.997907
34.5	0.833967	0.99057	0.997857	0.99784	0.00792	0.997857
35.5	0.815112	0.989767	0.997691	0.997677	0.006081	0.997691
36.5	0.790284	0.988804	0.997543	0.997523	0.008301	0.997543
37.5	0.780762	0.987265	0.997259	0.997228	0.011074	0.997259
38.5	0.765071	0.986066	0.997002	0.996991	0.003941	0.997002
39.5	0.750214	0.985607	0.996754	0.996763	-0.002707	0.996754
40.5	0.742854	0.985997	0.996664	0.996679	-0.004757	0.996664
41.5	0.741226	0.985813	0.996668	0.996664	0.001233	0.996668
42.5	0.718235	0.983788	0.996437	0.996397	0.011035	0.996437
43.5	0.685077	0.982352	0.996071	0.996033	0.009452	0.996071
44.5	0.665782	0.980709	0.995519	0.99551	0.002018	0.995519
45.5	0.634243	0.978188	0.99517	0.995217	-0.009932	0.99517
46.5	0.616856	0.975208	0.99488	0.99495	-0.013714	0.99488
47.5	0.591446	0.973169	0.994743	0.994809	-0.012687	0.994743
48.5	0.581125	0.972299	0.99454	0.994567	-0.004981	0.99454
49.5	0.569307	0.972075	0.994152	0.994167	-0.002514	0.994152
50.5	0.556127	0.970483	0.993616	0.993658	-0.006635	0.993616
51.5	0.5451	0.968154	0.993042	0.993105	-0.00918	0.993042
52.5	0.525432	0.966514	0.992515	0.992594	-0.010631	0.992515
53.5	0.51002	0.964916	0.991889	0.992011	-0.015296	0.991889
54.5	0.494717	0.963569	0.991357	0.991464	-0.012506	0.991357
55.5	0.490106	0.962686	0.990895	0.990979	-0.009317	0.990895
56.5	0.478753	0.961967	0.99047	0.990441	0.003049	0.99047
57.5	0.467361	0.960402	0.990076	0.989973	0.01026	0.990076
58.5	0.459115	0.958277	0.989527	0.989429	0.009292	0.989527
59.5	0.435889	0.955732	0.988994	0.988987	0.000606	0.988994
60.5	0.422807	0.952609	0.988425	0.988533	-0.009346	0.988425
61.5	0.407619	0.950435	0.987975	0.988121	-0.012314	0.987975
62.5	0.402504	0.948811	0.98758	0.987741	-0.013113	0.98758
63.5	0.383991	0.946534	0.98716	0.987295	-0.010617	0.98716
64.5	0.369643	0.943911	0.986603	0.986734	-0.009894	0.986603
65.5	0.367683	0.94145	0.985844	0.986014	-0.012141	0.985844
66.5	0.356259	0.939572	0.985393	0.985564	-0.011808	0.985393
67.5	0.347591	0.937599	0.984835	0.98505	-0.014385	0.984835
68.5	0.33919	0.936257	0.984485	0.984742	-0.01688	0.984485
69.5	0.335606	0.935649	0.984363	0.984641	-0.018155	0.984363
70.5	0.332152	0.934898	0.984155	0.98445	-0.018982	0.984155
71.5	0.326365	0.935331	0.984089	0.984358	-0.017212	0.984089
72.5	0.32259	0.933831	0.983754	0.984025	-0.016966	0.983754
73.5	0.314815	0.93164	0.983597	0.983911	-0.019501	0.983597
74.5	0.309589	0.929154	0.983435	0.983735	-0.018451	0.983435
75.5	0.31752	0.929257	0.983382	0.983627	-0.014944	0.983382
76.5	0.312793	0.930506	0.983238	0.983392	-0.009241	0.983238
77.5	0.306364	0.930666	0.982959	0.982997	-0.002219	0.982959
78.5	0.299901	0.92974	0.982599	0.98263	-0.001784	0.982599
79.5	0.302173	0.927415	0.982025	0.982053	-0.001531	0.982025
80.5	0.290549	0.925323	0.981492	0.981591	-0.005352	0.981492
81.5	0.291517	0.923094	0.980903	0.980994	-0.004795	0.980903
82.5	0.285063	0.920542	0.980629	0.980663	-0.001766	0.980629
83.5	0.284683	0.92026	0.980832	0.980795	0.001934	0.980832
84.5	0.280946	0.920743	0.981188	0.981177	0.00057	0.981188
85.5	0.281788	0.922607	0.981505	0.981525	-0.001094	0.981505
86.5	0.278555	0.923692	0.981372	0.981338	0.001843	0.981372
87.5	0.270846	0.921958	0.980821	0.980785	0.001855	0.980821
88.5	0.261718	0.917505	0.979953	0.979851	0.005073	0.979953
89.5	0.263653	0.913217	0.978944	0.978743	0.009463	0.978944
90.5	0.258196	0.912386	0.978318	0.978029	0.013144	0.978318
91.5	0.245302	0.911364	0.977469	0.977214	0.011204	0.977469
92.5	0.241932	0.908938	0.976921	0.976685	0.010137	0.976921
93.5	0.241154	0.905993	0.976044	0.975912	0.005481	0.976044
94.5	0.228195	0.902961	0.975328	0.975098	0.009225	0.975328
95.5	0.230977	0.900745	0.974516	0.974162	0.013705	0.974516
96.5	0.218341	0.898432	0.972973	0.972543	0.015667	0.972973
97.5	0.208264	0.89311	0.971126	0.970594	0.018092	0.971126
98.5	0.193531	0.884191	0.969009	0.968264	0.023468	0.969009
99.5	0.184372	0.877634	0.967246	0.96607	0.03466	0.967246
100.5	0.179655	0.875038	0.965808	0.964134	0.046674	0.965808
101.5	0.178833	0.871628	0.964852	0.96236	0.066213	0.964852
102.5	0.168026	0.865109	0.963486	0.959271	0.103482	0.963486
103.5	0.159035	0.856458	0.961271	0.952975	0.17642	0.961271
104.5	0.151522	0.848497	0.958774	0.940911	0.3023	0.958774
105.5	0.145035	0.841832	0.956498	0.917431	0.473139	0.956498
106.5	0.136472	0.838892	0.955004	0.869511	0.655173	0.955004
107.5	0.130086	0.838061	0.954406	0.771179	0.800746	0.954406
108.5	0.136553	0.836373	0.953801	0.596868	0.885401	0.885401
109.5	0.127941	0.833892	0.952884	0.41682	0.919208	0.919208
110.5	0.122236	0.826967	0.951008	0.332001	0.926659	0.926659
111.5	0.119922	0.818094	0.94872	0.297503	0.927003	0.927003
112.5	0.110548	0.805786	0.945943	0.258192	0.927128	0.927128
113.5	0.099718	0.790608	0.942209	0.205961	0.927219	0.927219
114.5	0.093641	0.777537	0.93809	0.163456	0.925994	0.925994
115.5	0.094624	0.767684	0.934077	0.133197	0.923947	0.923947
116.5	0.085017	0.761205	0.931413	0.106612	0.923228	0.923228
117.5	0.078238	0.759425	0.930263	0.088906	0.923458	0.923458
118.5	0.08109	0.75861	0.929842	0.080379	0.92371	0.92371
119.5	0.081831	0.753079	0.928959	0.083011	0.922528	0.922528
120.5	0.074312	0.745317	0.927047	0.0861	0.920174	0.920174
121.5	0.069522	0.73959	0.923846	0.084725	0.916797	0.916797
122.5	0.070839	0.731511	0.920043	0.082707	0.912834	0.912834
123.5	0.068262	0.719391	0.91558	0.075287	0.908707	0.908707
124.5	0.064643	0.70475	0.91112	0.066814	0.904756	0.904756
125.5	0.061257	0.693487	0.907183	0.054242	0.901859	0.901859
126.5	0.058506	0.684692	0.903579	0.047104	0.898812	0.898812
127.5	0.061013	0.672711	0.899555	0.04825	0.894462	0.894462
128.5	0.053589	0.659528	0.894387	0.052352	0.888552	0.888552
129.5	0.051155	0.647088	0.889104	0.053847	0.882792	0.882792
130.5	0.048374	0.638848	0.883488	0.052023	0.877094	0.877094
131.5	0.043369	0.629801	0.876765	0.042145	0.871343	0.871343
132.5	0.039859	0.609378	0.868412	0.037078	0.863345	0.863345
133.5	0.032261	0.581525	0.858349	0.03197	0.85367	0.85367
134.5	0.035869	0.561246	0.848041	0.030799	0.843212	0.843212
135.5	0.030691	0.539417	0.837235	0.025079	0.833049	0.833049
136.5	0.028031	0.519426	0.826623	0.017533	0.823529	0.823529
137.5	0.025787	0.493352	0.813509	0.013484	0.81096	0.81096
138.5	0.026515	0.468518	0.798769	0.012057	0.796314	0.796314
139.5	0.021336	0.4409	0.7807	0.008742	0.778767	0.778767
140.5	0.019066	0.409689	0.760986	0.003451	0.760158	0.760158
141.5	0.014289	0.373203	0.737366	0.005206	0.735991	0.735991
142.5	0.015085	0.333277	0.709202	0.011795	0.705732	0.705732
143.5	0.009087	0.298965	0.679759	0.019045	0.673541	0.673541
144.5	0.005483	0.274429	0.648372	0.0243	0.639614	0.639614
145.5	0.010703	0.257279	0.617198	0.024442	0.607608	0.607608
146.5	0.006022	0.230417	0.586083	0.023293	0.576212	0.576212
147.5	0.006722	0.208405	0.556309	0.023458	0.545651	0.545651
148.5	0.001541	0.192393	0.527387	0.019953	0.517765	0.517765
149.5	0.003573	0.174793	0.501716	0.016904	0.493149	0.493149
150.5	0.006503	0.159032	0.480826	0.011705	0.474677	0.474677
151.5	0.003884	0.148847	0.464677	0.006571	0.461136	0.461136
152.5	0.004358	0.144011	0.448514	0.003827	0.446395	0.446395
153.5	0.004334	0.138656	0.431692	-0.004445	0.434207	0.434207
154.5	0.004209	0.128081	0.41062	-0.010655	0.416833	0.416833
155.5	0.002696	0.110428	0.387019	-0.015462	0.396353	0.396353
156.5	0.001098	0.09105	0.362655	-0.018909	0.374483	0.374483
157.5	0.000831	0.076181	0.336403	-0.019805	0.34929	0.34929
158.5	0.001177	0.073705	0.313992	-0.017108	0.325531	0.325531
159.5	0.001146	0.076416	0.295456	-0.012591	0.304217	0.304217
160.5	0.003711	0.075532	0.282701	-0.005887	0.286899	0.286899
161.5	0.002301	0.072275	0.270243	-0.002194	0.271841	0.271841
162.5	0.000462	0.069368	0.260144	0.003617	0.257458	0.257458
163.5	0.00066	0.062332	0.249519	0.003391	0.246965	0.246965
164.5	0.001708	0.061261	0.23941	0.006902	0.234124	0.234124
165.5	-0.001263	0.057038	0.224762	0.011107	0.216054	0.216054
166.5	0.001367	0.052296	0.206752	0.015927	0.193913	0.193913
167.5	7.1e-05	0.048636	0.186528	0.013242	0.175611	0.175611
168.5	0.000214	0.040717	0.169217	0.006728	0.163589	0.163589
169.5	-0.001233	0.031688	0.158326	-0.005917	0.163277	0.163277
170.5	0.003366	0.032646	0.152076	-0.013738	0.163567	0.163567
171.5	-0.000236	0.034109	0.147165	-0.013225	0.158297	0.158297
172.5	-0.002673	0.022391	0.137744	-0.006247	0.143097	0.143097
173.5	0.002409	0.018567	0.125404	-0.004036	0.12892	0.12892
174.5	0.001919	0.025832	0.111668	-0.007896	0.118627	0.118627
175.5	0.002424	0.02266	0.100458	-0.011434	0.110628	0.110628
176.5	-0.001104	0.011473	0.08976	-0.015203	0.103392	0.103392
177.5	-0.001352	0.005848	0.077186	-0.014628	0.09049	0.09049
178.5	-0.000897	0.004736	0.065201	-0.013079	0.077269	0.077269
179.5	0.001879	0.007177	0.06062	-0.010327	0.070222	0.070222
180.5	0.002344	0.011748	0.058905	-0.00982	0.068056	0.068056
181.5	-0.000761	0.017904	0.058172	-0.010514	0.067972	0.067972
182.5	-0.000425	0.015706	0.058867	-0.011902	0.069936	0.069936
183.5	-0.000181	0.012952	0.056357	-0.010747	0.06639	0.06639
184.5	-0.003627	0.013662	0.052017	-0.010649	0.062006	0.062006
185.5	0.001611	0.016955	0.046271	-0.007927	0.053772	0.053772
186.5	-7e-06	0.012895	0.038757	-0.004125	0.042706	0.042706
187.5	0.000304	0.007576	0.033373	0.001736	0.031693	0.031693
188.5	0.00331	0.008218	0.034688	0.005727	0.029128	0.029128
189.5	0.000986	0.009546	0.03654	0.005672	0.031045	0.031045
190.5	-0.001871	0.009976	0.039106	-0.002588	0.041586	0.041586
191.5	-0.001907	0.00726	0.038814	-0.008048	0.046488	0.046488
192.5	-0.000664	0.003171	0.034356	-0.008955	0.042927	0.042927
193.5	0.000682	0.002507	0.025699	-0.00684	0.032318	0.032318
194.5	-0.001552	-0.000179	0.017543	-0.003467	0.020937	0.020937
195.5	0.000864	-0.000753	0.015185	-0.004246	0.019349	0.019349
196.5	0.000897	-0.002874	0.017102	-0.005416	0.022397	0.022397
197.5	0.000908	-0.000534	0.022095	-0.003208	0.025222	0.025222
198.5	0.002561	0.004056	0.022849	-0.000252	0.023095	0.023095
199.5	-0.000334	0.008114	0.019381	0.001662	0.017748	0.017748
200.5	0.001616	0.007675	0.019427	0.001404	0.018049	0.018049
201.5	0.000396	0.006777	0.019126	-0.002326	0.021402	0.021402
202.5	0.002316	0.004436	0.017467	-0.004679	0.022043	0.022043
203.5	-0.002605	0.006869	0.01205	-0.001746	0.013772	0.013772
204.5	0.000681	0.007655	0.001991	3e-05	0.001961	0.001961
205.5	0.000869	0.008928	-0.005574	0.00276	-0.008357	-0.008357
206.5	-0.00148	0.006657	-0.009493	0.004307	-0.01386	-0.01386
207.5	3e-06	-0.004169	-0.011668	0.005064	-0.016817	-0.016817
208.5	-0.001019	-0.010676	-0.012554	0.003251	-0.015857	-0.015857
209.5	-0.002738	-0.009379	-0.012569	0.001017	-0.013599	-0.013599
210.5	0.002495	-0.007464	-0.010078	-0.001799	-0.008265	-0.008265
211.5	0.002226	-0.005948	-0.008046	-0.003832	-0.004198	-0.004198
212.5	0.000382	-0.005504	-0.005222	-0.006511	0.00128	0.00128
213.5	-0.001404	-0.001557	-0.008925	-0.009457	0.000526	0.000526
214.5	-0.001465	0.00154	-0.014931	-0.012027	-0.00287	-0.00287
215.5	-8e-05	1.2e-05	-0.018694	-0.008229	-0.01038	-0.01038
216.5	-0.001155	-0.0045	-0.01994	-0.00094	-0.018982	-0.018982
217.5	-0.00043	-0.002195	-0.015061	0.010462	-0.025792	-0.025792
218.5	0.001253	0.001721	-0.008209	0.012226	-0.020687	-0.020687
219.5	-0.001035	0.007036	0.00198	0.00742	-0.00548	-0.00548
220.5	8e-05	0.008087	0.00873	-0.000106	0.008836	0.008836
221.5	0.000749	0.004486	0.012845	-0.005052	0.017807	0.017807
222.5	0.002564	0.00128	0.011072	-0.004996	0.015988	0.015988
223.5	0.000408	0.000261	0.007381	-0.001379	0.008748	0.008748
224.5	-0.002235	0.001958	0.004693	0.002202	0.002496	0.002496
225.5	-0.000369	-0.001295	0.005937	0.00303	0.002916	0.002916
226.5	0.000935	-0.00039	0.00803	0.005347	0.002697	0.002697
227.5	-0.000148	0.003374	0.012289	0.006264	0.006063	0.006063
228.5	-0.000788	0.005344	0.010167	0.008201	0.001983	0.001983
229.5	-0.000713	0.002088	0.005347	0.007747	-0.002419	-0.002419
230.5	-0.001719	0.000183	-0.002992	0.007416	-0.010487	-0.010487
231.5	-0.001592	-0.002525	-0.009732	0.00587	-0.015694	-0.015694
232.5	-0.001914	-0.007691	-0.011328	0.004213	-0.015607	-0.015607
233.5	-0.002875	-0.006738	-0.00845	0.004216	-0.012719	-0.012719
234.5	-0.001777	-0.000411	-0.003402	0.006909	-0.010382	-0.010382
235.5	-0.002728	0.006679	-0.000389	0.00723	-0.007675	-0.007675
236.5	0.001708	0.008107	0.004492	0.005829	-0.001345	-0.001345
237.5	0.000675	0.006527	0.00786	0.003625	0.00425	0.00425
238.5	-0.001014	0.004576	0.008753	0.00459	0.004182	0.004182
239.5	0.001726	0.001356	0.005853	0.003739	0.002122	0.002122
240.5	-0.001173	0.000338	-0.000437	0.003929	-0.004384	-0.004384
241.5	-0.000375	0.00017	-0.004619	0.005979	-0.010661	-0.010661
242.5	0.003392	0.00254	-0.001392	0.006525	-0.007969	-0.007969
243.5	-0.001943	0.000973	0.001367	0.010275	-0.009001	-0.009001
244.5	-0.000782	0.000327	0.000424	0.009033	-0.008687	-0.008687
245.5	0.000247	0.002144	-0.004166	0.003767	-0.007963	-0.007963
246.5	0.002227	0.004648	-0.009305	-0.001756	-0.007536	-0.007536
247.5	-0.000835	0.00634	-0.010445	-0.003734	-0.006685	-0.006685
248.5	0.001327	0.002823	-0.007814	-0.000463	-0.007348	-0.007348
249.5	-0.002251	-0.001077	-0.006826	0.001944	-0.008787	-0.008787
250.5	0.001268	-0.004313	-0.008659	0.001714	-0.010392	-0.010392
251.5	0.00142	-0.005509	-0.012909	-0.000901	-0.011998	-0.011998
252.5	-0.00044	-0.003818	-0.015103	-0.00066	-0.014433	-0.014433
253.5	0.00093	-0.002665	-0.014873	0.000966	-0.015854	-0.015854

## Sheet: SF_Empty_50s
wave_number	fsc_nomask	fsc_loosemask	fsc_tightmask	fsc_noisesub_raw	fsc_noisesub_true	fsc_noisesub
0.5	1	1	1	1	nan	1
1.5	0.999969	1	1	1	1	1
2.5	0.999941	0.999997	1	1	-0.2	1
3.5	0.999836	0.999985	0.999996	0.999996	0	0.999996
4.5	0.999773	0.999977	0.99999	0.99999	-0.029412	0.99999
5.5	0.999599	0.999968	0.999987	0.999988	-0.034314	0.999987
6.5	0.999302	0.999966	0.999975	0.999975	-0.002375	0.999975
7.5	0.998982	0.999925	0.99996	0.999959	0.024425	0.99996
8.5	0.998427	0.999872	0.999938	0.999933	0.067616	0.999938
9.5	0.998631	0.999912	0.999936	0.999933	0.038427	0.999936
10.5	0.998682	0.999893	0.999924	0.999923	0.01929	0.999924
11.5	0.998179	0.99983	0.9999	0.9999	-0.000597	0.9999
12.5	0.998081	0.999794	0.99989	0.99989	0	0.99989
13.5	0.997955	0.999769	0.999874	0.999878	-0.02871	0.999874
14.5	0.99801	0.999783	0.999894	0.999899	-0.054438	0.999894
15.5	0.997589	0.999772	0.999897	0.999898	-0.005845	0.999897
16.5	0.996837	0.999695	0.999875	0.99988	-0.039148	0.999875
17.5	0.996047	0.999598	0.999852	0.999854	-0.01634	0.999852
18.5	0.994945	0.999532	0.999821	0.999824	-0.015889	0.999821
19.5	0.993428	0.9994	0.999767	0.999769	-0.009824	0.999767
20.5	0.990925	0.999128	0.999709	0.999708	0.003467	0.999709
21.5	0.987099	0.998705	0.999614	0.999617	-0.006685	0.999614
22.5	0.985185	0.998495	0.99955	0.999548	0.004347	0.99955
23.5	0.983319	0.998306	0.999465	0.999464	0.001778	0.999465
24.5	0.979322	0.997891	0.99934	0.999341	-0.000723	0.99934
25.5	0.975628	0.99737	0.999277	0.999283	-0.00848	0.999277
26.5	0.974638	0.997244	0.99926	0.99926	-8.1e-05	0.99926
27.5	0.974393	0.997257	0.999207	0.999196	0.01349	0.999207
28.5	0.969614	0.996725	0.998991	0.998982	0.008902	0.998991
29.5	0.966474	0.996284	0.998784	0.998788	-0.003394	0.998784
30.5	0.964737	0.996048	0.998731	0.998741	-0.007952	0.998731
31.5	0.96245	0.996097	0.99881	0.998817	-0.005945	0.99881
32.5	0.96119	0.996037	0.998785	0.998797	-0.010456	0.998785
33.5	0.959551	0.99579	0.998687	0.998711	-0.018123	0.998687
34.5	0.961264	0.995724	0.998697	0.998711	-0.011379	0.998697
35.5	0.957973	0.995619	0.998732	0.998723	0.007606	0.998732
36.5	0.957006	0.995464	0.998722	0.998719	0.002651	0.998722
37.5	0.954778	0.99517	0.998693	0.998685	0.006072	0.998693
38.5	0.9511	0.994792	0.998598	0.998599	-0.000723	0.998598
39.5	0.946754	0.994121	0.99844	0.998449	-0.00565	0.99844
40.5	0.940829	0.993453	0.998275	0.998275	-0.000104	0.998275
41.5	0.937401	0.993121	0.998112	0.998119	-0.004057	0.998112
42.5	0.934044	0.992574	0.997981	0.997984	-0.001685	0.997981
43.5	0.9285	0.991963	0.997865	0.997863	0.000558	0.997865
44.5	0.921624	0.991219	0.997596	0.997563	0.013479	0.997596
45.5	0.913073	0.990248	0.997343	0.997321	0.008498	0.997343
46.5	0.903286	0.989208	0.997137	0.997121	0.005487	0.997137
47.5	0.897719	0.988407	0.996879	0.996875	0.001373	0.996879
48.5	0.892244	0.988137	0.996692	0.996678	0.003984	0.996692
49.5	0.890279	0.987484	0.996484	0.996473	0.00316	0.996484
50.5	0.880524	0.986959	0.99629	0.996298	-0.00227	0.99629
51.5	0.875886	0.986084	0.996064	0.996087	-0.005972	0.996064
52.5	0.869045	0.985379	0.996039	0.996037	0.000496	0.996039
53.5	0.863882	0.985301	0.995912	0.995891	0.005077	0.995912
54.5	0.86154	0.984898	0.995826	0.99581	0.003756	0.995826
55.5	0.858962	0.984276	0.995627	0.995614	0.003044	0.995627
56.5	0.856471	0.983489	0.995267	0.99525	0.003489	0.995267
57.5	0.851348	0.982897	0.99507	0.99509	-0.004067	0.99507
58.5	0.842709	0.982287	0.995038	0.995058	-0.003932	0.995038
59.5	0.833804	0.981436	0.994882	0.994876	0.001175	0.994882
60.5	0.829739	0.980574	0.994621	0.994613	0.001317	0.994621
61.5	0.821981	0.979533	0.994224	0.99423	-0.001147	0.994224
62.5	0.809492	0.978282	0.993805	0.993804	0.000115	0.993805
63.5	0.803861	0.977391	0.993594	0.993589	0.000818	0.993594
64.5	0.792492	0.975603	0.993177	0.993189	-0.001645	0.993177
65.5	0.786986	0.974592	0.992958	0.992977	-0.00275	0.992958
66.5	0.777788	0.973922	0.992709	0.992754	-0.006268	0.992709
67.5	0.772784	0.973015	0.99241	0.992474	-0.008434	0.99241
68.5	0.773398	0.972844	0.992217	0.99226	-0.005506	0.992217
69.5	0.777129	0.972936	0.992174	0.9922	-0.00324	0.992174
70.5	0.771194	0.97301	0.992106	0.992136	-0.003752	0.992106
71.5	0.775133	0.973405	0.992232	0.992263	-0.00389	0.992232
72.5	0.775576	0.973077	0.992362	0.992349	0.001605	0.992362
73.5	0.772079	0.972425	0.992169	0.992151	0.002255	0.992169
74.5	0.762239	0.97172	0.991818	0.991814	0.000444	0.991818
75.5	0.759819	0.970953	0.991722	0.991733	-0.001355	0.991722
76.5	0.7541	0.970477	0.991608	0.991624	-0.001857	0.991608
77.5	0.754805	0.970554	0.99156	0.991547	0.001537	0.99156
78.5	0.751878	0.970486	0.991603	0.991577	0.003085	0.991603
79.5	0.749923	0.970207	0.991693	0.991654	0.004713	0.991693
80.5	0.746388	0.969727	0.991628	0.9916	0.003307	0.991628
81.5	0.744331	0.969022	0.991334	0.991294	0.004608	0.991334
82.5	0.731309	0.967196	0.99085	0.990837	0.001399	0.99085
83.5	0.730821	0.966272	0.990529	0.990538	-0.000907	0.990529
84.5	0.724883	0.96613	0.990546	0.99056	-0.001522	0.990546
85.5	0.722779	0.966043	0.990561	0.990595	-0.003644	0.990561
86.5	0.721096	0.965682	0.990362	0.990393	-0.00322	0.990362
87.5	0.714754	0.964186	0.98981	0.989826	-0.001629	0.98981
88.5	0.7014	0.962968	0.989271	0.989268	0.000289	0.989271
89.5	0.696777	0.962276	0.989049	0.989038	0.001	0.989049
90.5	0.695795	0.962182	0.989156	0.989125	0.002834	0.989156
91.5	0.689113	0.961244	0.989023	0.988991	0.002929	0.989023
92.5	0.682663	0.959857	0.988673	0.988648	0.00221	0.988673
93.5	0.676577	0.958733	0.988224	0.988176	0.004088	0.988224
94.5	0.665828	0.957478	0.987704	0.987625	0.006372	0.987704
95.5	0.65632	0.955557	0.986974	0.986868	0.008061	0.986974
96.5	0.64132	0.953045	0.986105	0.986043	0.004454	0.986105
97.5	0.630756	0.950523	0.98548	0.985467	0.000886	0.98548
98.5	0.627684	0.949152	0.985289	0.985272	0.001145	0.985289
99.5	0.620731	0.948048	0.985037	0.985019	0.001174	0.985037
100.5	0.607944	0.946478	0.98465	0.984594	0.003625	0.98465
101.5	0.597969	0.944506	0.984056	0.983963	0.005798	0.984056
102.5	0.59439	0.942286	0.983225	0.983133	0.005432	0.983225
103.5	0.57527	0.939867	0.982239	0.982157	0.004553	0.982239
104.5	0.5698	0.937655	0.981509	0.981462	0.002521	0.981509
105.5	0.55249	0.935175	0.980923	0.980905	0.000965	0.980923
106.5	0.545609	0.932716	0.98037	0.980283	0.004374	0.98037
107.5	0.537587	0.930505	0.97973	0.97953	0.009772	0.97973
108.5	0.529936	0.928921	0.979004	0.978766	0.011236	0.979004
109.5	0.517488	0.925762	0.978087	0.977838	0.011207	0.978087
110.5	0.503316	0.922607	0.97694	0.976713	0.009749	0.97694
111.5	0.488957	0.91806	0.97568	0.97538	0.012207	0.97568
112.5	0.475394	0.914146	0.974577	0.974233	0.01335	0.974577
113.5	0.468511	0.91252	0.97376	0.973448	0.011765	0.97376
114.5	0.461904	0.911109	0.973281	0.972955	0.012047	0.973281
115.5	0.452185	0.908364	0.972735	0.972412	0.011725	0.972735
116.5	0.438824	0.903291	0.971247	0.971054	0.006665	0.971247
117.5	0.429418	0.898483	0.969421	0.969369	0.001691	0.969421
118.5	0.412895	0.894346	0.967873	0.967677	0.006063	0.967873
119.5	0.404907	0.89138	0.966782	0.966476	0.009132	0.966782
120.5	0.39915	0.88788	0.965682	0.965532	0.004354	0.965682
121.5	0.387216	0.883171	0.964249	0.964151	0.002747	0.964249
122.5	0.374629	0.879825	0.962926	0.962799	0.003413	0.962926
123.5	0.368336	0.876741	0.961872	0.961472	0.010379	0.961872
124.5	0.362877	0.873063	0.960411	0.959976	0.01087	0.960411
125.5	0.352242	0.869186	0.958845	0.958588	0.006206	0.958845
126.5	0.340146	0.864074	0.95695	0.956689	0.006021	0.95695
127.5	0.33397	0.859817	0.954989	0.954306	0.014946	0.954989
128.5	0.324584	0.854779	0.953566	0.952321	0.026124	0.953566
129.5	0.312353	0.848044	0.951707	0.949825	0.037505	0.951707
130.5	0.295646	0.839327	0.948332	0.946158	0.040379	0.948332
131.5	0.285664	0.830508	0.944649	0.942193	0.042496	0.944649
132.5	0.268932	0.821255	0.941154	0.938213	0.047598	0.941154
133.5	0.24957	0.808774	0.936771	0.93279	0.059229	0.936771
134.5	0.237191	0.796456	0.93244	0.927072	0.073608	0.93244
135.5	0.226598	0.783071	0.927257	0.92063	0.083485	0.927257
136.5	0.204338	0.766551	0.919894	0.91168	0.092996	0.919894
137.5	0.184523	0.745177	0.910666	0.89388	0.158181	0.910666
138.5	0.170345	0.723309	0.900695	0.848002	0.346666	0.900695
139.5	0.153436	0.701828	0.891441	0.728655	0.599924	0.891441
140.5	0.138039	0.676794	0.880978	0.48071	0.770798	0.880978
141.5	0.126019	0.648751	0.868752	0.26219	0.822112	0.822112
142.5	0.115581	0.626019	0.85699	0.187042	0.824087	0.824087
143.5	0.104006	0.603572	0.844344	0.149965	0.816883	0.816883
144.5	0.09732	0.576727	0.831916	0.126039	0.807675	0.807675
145.5	0.083104	0.548217	0.816445	0.104267	0.795078	0.795078
146.5	0.071959	0.516861	0.797565	0.088128	0.778001	0.778001
147.5	0.066024	0.486461	0.775987	0.074758	0.757887	0.757887
148.5	0.059275	0.458761	0.754746	0.065214	0.737637	0.737637
149.5	0.056273	0.433343	0.736957	0.06004	0.720155	0.720155
150.5	0.053033	0.415481	0.725215	0.061976	0.70706	0.70706
151.5	0.047396	0.398744	0.711315	0.058769	0.69329	0.69329
152.5	0.042046	0.373812	0.691132	0.049084	0.675189	0.675189
153.5	0.036027	0.35176	0.668794	0.04058	0.654785	0.654785
154.5	0.034026	0.333247	0.648156	0.043098	0.632309	0.632309
155.5	0.031635	0.316163	0.626981	0.043269	0.610111	0.610111
156.5	0.030947	0.294907	0.605951	0.042359	0.588521	0.588521
157.5	0.023184	0.281868	0.58777	0.048165	0.56691	0.56691
158.5	0.030484	0.271723	0.575068	0.052701	0.551428	0.551428
159.5	0.024039	0.254433	0.556069	0.041451	0.536872	0.536872
160.5	0.019578	0.232655	0.535028	0.027159	0.522047	0.522047
161.5	0.016938	0.219973	0.51492	0.018908	0.505572	0.505572
162.5	0.020821	0.206548	0.494596	0.018946	0.484835	0.484835
163.5	0.014203	0.188053	0.472366	0.021021	0.461037	0.461037
164.5	0.019927	0.177016	0.454662	0.019626	0.443745	0.443745
165.5	0.012169	0.167631	0.438065	0.020707	0.426183	0.426183
166.5	0.01562	0.157797	0.420838	0.020534	0.408697	0.408697
167.5	0.006515	0.151664	0.403653	0.017083	0.393288	0.393288
168.5	0.012014	0.14529	0.387661	0.018078	0.376387	0.376387
169.5	0.010813	0.133271	0.367483	0.01661	0.3568	0.3568
170.5	0.007739	0.125359	0.345977	0.017194	0.334535	0.334535
171.5	0.008494	0.115085	0.329087	0.02395	0.312624	0.312624
172.5	0.011264	0.107362	0.31736	0.022616	0.301564	0.301564
173.5	0.005977	0.100224	0.301015	0.016063	0.289604	0.289604
174.5	0.009773	0.096681	0.286905	0.013716	0.276988	0.276988
175.5	0.005284	0.093062	0.270863	0.004098	0.267862	0.267862
176.5	0.005626	0.08603	0.256494	-0.006001	0.260929	0.260929
177.5	0.002557	0.073865	0.242717	-0.003418	0.245297	0.245297
178.5	0.002229	0.070501	0.229711	0.002173	0.228034	0.228034
179.5	0.003155	0.068161	0.214002	0.001693	0.212669	0.212669
180.5	0.003644	0.061049	0.200944	-0.000665	0.201475	0.201475
181.5	0.006515	0.059657	0.188923	0.000733	0.188328	0.188328
182.5	0.002711	0.052672	0.180222	0.00102	0.179385	0.179385
183.5	0.000302	0.043694	0.168314	0.001324	0.167211	0.167211
184.5	-0.000283	0.039505	0.151342	0.005108	0.146986	0.146986
185.5	0.006269	0.040087	0.138861	0.007337	0.132496	0.132496
186.5	0.006515	0.034805	0.131089	0.006706	0.125223	0.125223
187.5	0.000566	0.036701	0.128958	0.000929	0.128148	0.128148
188.5	-0.001085	0.032738	0.124785	-0.00118	0.125816	0.125816
189.5	0.005159	0.032265	0.117636	0.000143	0.11751	0.11751
190.5	0.002966	0.027536	0.108233	0.003285	0.105295	0.105295
191.5	0.001749	0.022864	0.095917	0.006009	0.090451	0.090451
192.5	0.003701	0.024815	0.087032	0.005067	0.082383	0.082383
193.5	0.00107	0.025768	0.082283	0.004843	0.077817	0.077817
194.5	-0.000375	0.022052	0.069173	0.006172	0.063392	0.063392
195.5	0.003301	0.016699	0.059173	0.009552	0.050099	0.050099
196.5	-0.001659	0.013897	0.053257	0.005026	0.048474	0.048474
197.5	0.001562	0.012967	0.048706	-0.000226	0.048921	0.048921
198.5	0.002576	0.014139	0.046707	0.005148	0.041774	0.041774
199.5	-0.000685	0.011252	0.041618	0.013474	0.028528	0.028528
200.5	-0.000139	0.005659	0.038691	0.012227	0.026791	0.026791
201.5	-0.000652	0.005546	0.033169	0.006546	0.026799	0.026799
202.5	-0.001331	0.003197	0.031335	0.003039	0.028382	0.028382
203.5	-0.000517	0.003833	0.029187	-0.00101	0.030166	0.030166
204.5	0.00112	0.010302	0.026829	-0.005535	0.032185	0.032185
205.5	-0.000237	0.009628	0.021889	-0.003668	0.025464	0.025464
206.5	0.002378	0.00908	0.021888	-0.001007	0.022872	0.022872
207.5	-0.001453	0.003039	0.019897	-0.000726	0.020608	0.020608
208.5	0.000444	0.005216	0.018015	0.002479	0.015574	0.015574
209.5	0.002943	0.005307	0.016669	0.002759	0.013948	0.013948
210.5	0.000984	0.001483	0.011642	-0.00088	0.012511	0.012511
211.5	0.000813	0.000273	0.007243	-0.000799	0.008035	0.008035
212.5	0.00355	0.000351	0.009922	-0.001543	0.011448	0.011448
213.5	-0.000435	0.002531	0.012721	-0.002705	0.015384	0.015384
214.5	-0.00109	0.00471	0.010529	0.0055	0.005056	0.005056
215.5	0.001691	0.00849	0.010133	0.008835	0.00131	0.00131
216.5	0.002966	0.005795	0.01184	0.00557	0.006305	0.006305
217.5	0.001901	0.00068	0.011029	0.004311	0.006747	0.006747
218.5	0.002076	0.00132	0.005751	0.004822	0.000933	0.000933
219.5	0.00079	0.001661	0.001321	0.005005	-0.003702	-0.003702
220.5	0.004203	0.003738	0.001874	0.005337	-0.003481	-0.003481
221.5	0.000765	0.000364	0.002877	0.000189	0.002689	0.002689
222.5	-5.6e-05	-0.00185	0.001696	-0.003073	0.004755	0.004755
223.5	-0.001066	-0.001075	0.001996	0.003161	-0.001169	-0.001169
224.5	-0.000701	0.002134	0.004571	0.007945	-0.003401	-0.003401
225.5	0.000902	0.006091	0.008469	0.008875	-0.000409	-0.000409
226.5	-0.000702	0.006863	0.005997	0.007106	-0.001118	-0.001118
227.5	0.000529	-0.001582	0.001073	0.007984	-0.006966	-0.006966
228.5	0.00036	0.001976	0.001478	0.006046	-0.004596	-0.004596
229.5	0.001092	0.006372	0.00153	0.007612	-0.006129	-0.006129
230.5	0.002112	0.003394	0.000413	0.005718	-0.005335	-0.005335
231.5	-0.000691	-0.001109	-0.0018	0.001893	-0.0037	-0.0037
232.5	-0.003803	-0.002549	-0.000348	0.00121	-0.00156	-0.00156
233.5	-9.9e-05	-5.1e-05	-0.002634	0.001053	-0.003691	-0.003691
234.5	-0.001927	0.000496	-0.003041	-0.001453	-0.001585	-0.001585
235.5	-0.000128	2.3e-05	-0.003631	0.000852	-0.004487	-0.004487
236.5	0.000872	-0.000362	-0.001403	0.0027	-0.004113	-0.004113
237.5	0.000338	0.003223	-0.000156	0.003311	-0.003478	-0.003478
238.5	-0.000624	0.001898	-0.002661	0.004733	-0.00743	-0.00743
239.5	0.001198	-0.002401	-0.006373	0.000954	-0.007334	-0.007334
240.5	-0.000704	-0.000487	-0.005155	0.000205	-0.005361	-0.005361
241.5	0.000455	0.004073	-0.003881	0.002078	-0.005971	-0.005971
242.5	0.002396	0.004673	-0.002892	-0.001441	-0.001449	-0.001449
243.5	-0.000378	0.002641	0.000166	-0.001916	0.002078	0.002078
244.5	0.001336	0.002384	0.003285	3.5e-05	0.00325	0.00325
245.5	-0.001344	0.003589	0.005384	-0.001889	0.00726	0.00726
246.5	0.000355	0.004567	0.00482	-0.005124	0.009893	0.009893
247.5	0.001108	0.003442	0.003356	-0.004781	0.008099	0.008099
248.5	-0.000998	0.002042	0.002482	0.002077	0.000406	0.000406
249.5	-0.001302	-0.002292	0.002684	0.006072	-0.003408	-0.003408
250.5	0.001263	-0.002816	0.002108	0.006126	-0.004043	-0.004043
251.5	-0.000941	-0.001149	0.000461	0.00454	-0.004098	-0.004098
252.5	0.00063	-0.00096	0.002093	0.004053	-0.001968	-0.001968
253.5	0.001597	0.003171	0.003115	0.00346	-0.000347	-0.000347

## Sheet: SF_Empty_30s_core
wave_number	fsc_nomask	fsc_loosemask	fsc_tightmask	fsc_noisesub_raw	fsc_noisesub_true	fsc_noisesub
0.5	1	1	1	1	nan	1
1.5	0.999964	0.999998	1	1	1	1
2.5	0.999928	0.999996	1	1	0.2	1
3.5	0.999857	0.999992	0.999999	0.999999	0.25	0.999999
4.5	0.99978	0.999982	0.999997	0.999997	0.098039	0.999997
5.5	0.999559	0.999968	0.999993	0.999993	0.034783	0.999993
6.5	0.999251	0.999946	0.999985	0.999986	-0.049793	0.999985
7.5	0.998807	0.999923	0.999976	0.999976	0	0.999976
8.5	0.998334	0.999864	0.999957	0.999955	0.034713	0.999957
9.5	0.998406	0.999855	0.999932	0.999928	0.055464	0.999932
10.5	0.998237	0.999818	0.999916	0.999909	0.068376	0.999916
11.5	0.997507	0.999754	0.999908	0.999899	0.094706	0.999908
12.5	0.997268	0.999753	0.999902	0.999891	0.100872	0.999902
13.5	0.997089	0.999743	0.999894	0.999887	0.061611	0.999894
14.5	0.997077	0.999692	0.999891	0.999889	0.017685	0.999891
15.5	0.996733	0.999658	0.999894	0.999894	-0.002809	0.999894
16.5	0.995732	0.999588	0.999876	0.999878	-0.017604	0.999876
17.5	0.994158	0.999527	0.999854	0.999857	-0.020886	0.999854
18.5	0.99206	0.99938	0.999816	0.999823	-0.035642	0.999816
19.5	0.990138	0.999182	0.999771	0.999778	-0.033566	0.999771
20.5	0.986153	0.999001	0.999693	0.999698	-0.014984	0.999693
21.5	0.978863	0.998476	0.999596	0.999596	-0.001181	0.999596
22.5	0.974265	0.99789	0.999485	0.999485	-0.000926	0.999485
23.5	0.972705	0.99757	0.999361	0.99937	-0.014667	0.999361
24.5	0.966258	0.997232	0.99927	0.99929	-0.028456	0.99927
25.5	0.960393	0.996846	0.999206	0.999223	-0.021241	0.999206
26.5	0.958555	0.996248	0.999155	0.999167	-0.013661	0.999155
27.5	0.95984	0.996051	0.999089	0.999097	-0.008182	0.999089
28.5	0.953778	0.996236	0.999007	0.999023	-0.016295	0.999007
29.5	0.946646	0.99601	0.998931	0.998941	-0.009514	0.998931
30.5	0.942465	0.995367	0.998842	0.998856	-0.012142	0.998842
31.5	0.937128	0.994914	0.998732	0.998748	-0.012996	0.998732
32.5	0.934092	0.994845	0.998616	0.998641	-0.018683	0.998616
33.5	0.933716	0.994717	0.998574	0.998592	-0.013125	0.998574
34.5	0.933344	0.994385	0.998575	0.998584	-0.006737	0.998575
35.5	0.926131	0.993872	0.998547	0.998541	0.00433	0.998547
36.5	0.922611	0.99357	0.998468	0.998459	0.005881	0.998468
37.5	0.917846	0.993392	0.998406	0.9984	0.003836	0.998406
38.5	0.911908	0.992978	0.998384	0.998383	0.000442	0.998384
39.5	0.907275	0.992508	0.9983	0.998301	-0.000351	0.9983
40.5	0.898928	0.992197	0.998175	0.998189	-0.007637	0.998175
41.5	0.889497	0.991307	0.998004	0.998015	-0.005856	0.998004
42.5	0.876297	0.990083	0.99772	0.997725	-0.002279	0.99772
43.5	0.867458	0.989334	0.99741	0.99739	0.007605	0.99741
44.5	0.852261	0.98797	0.997047	0.997026	0.007075	0.997047
45.5	0.831838	0.986058	0.996803	0.996785	0.005617	0.996803
46.5	0.814049	0.98498	0.996474	0.996445	0.008049	0.996474
47.5	0.796507	0.983177	0.995986	0.995944	0.010332	0.995986
48.5	0.782831	0.981927	0.995649	0.9956	0.011123	0.995649
49.5	0.782272	0.981813	0.995593	0.995562	0.006944	0.995593
50.5	0.777777	0.98193	0.995583	0.995573	0.002141	0.995583
51.5	0.765667	0.980839	0.995443	0.995427	0.003545	0.995443
52.5	0.754654	0.979684	0.99531	0.995297	0.002864	0.99531
53.5	0.739962	0.978781	0.995005	0.99499	0.002974	0.995005
54.5	0.73384	0.977288	0.994598	0.994568	0.005585	0.994598
55.5	0.724662	0.975461	0.994129	0.994087	0.007077	0.994129
56.5	0.719011	0.97501	0.993996	0.993976	0.003335	0.993996
57.5	0.704713	0.974932	0.993841	0.993844	-0.000368	0.993841
58.5	0.693095	0.973799	0.993446	0.993479	-0.005064	0.993446
59.5	0.681038	0.972139	0.993033	0.993051	-0.002462	0.993033
60.5	0.669092	0.970399	0.992805	0.992752	0.00736	0.992805
61.5	0.661313	0.968367	0.992421	0.992339	0.010714	0.992421
62.5	0.637207	0.96515	0.991711	0.991628	0.009903	0.991711
63.5	0.610682	0.962403	0.990814	0.990746	0.007349	0.990814
64.5	0.595772	0.959177	0.990012	0.989902	0.010931	0.990012
65.5	0.579294	0.956605	0.989416	0.989272	0.013451	0.989416
66.5	0.563074	0.955312	0.988646	0.98854	0.009268	0.988646
67.5	0.554593	0.954581	0.987962	0.987964	-0.000173	0.987962
68.5	0.554602	0.953632	0.987581	0.987659	-0.006342	0.987581
69.5	0.54477	0.952365	0.987622	0.987722	-0.008107	0.987622
70.5	0.546966	0.950807	0.987984	0.988054	-0.005833	0.987984
71.5	0.547466	0.951866	0.988014	0.988102	-0.007445	0.988014
72.5	0.54794	0.952195	0.987746	0.987818	-0.005866	0.987746
73.5	0.534456	0.951757	0.987479	0.987569	-0.007211	0.987479
74.5	0.527824	0.950769	0.987317	0.987424	-0.008479	0.987317
75.5	0.524858	0.948772	0.986997	0.987149	-0.011804	0.986997
76.5	0.513875	0.948038	0.986809	0.986968	-0.012244	0.986809
77.5	0.51589	0.947006	0.986734	0.986839	-0.007966	0.986734
78.5	0.500104	0.945368	0.986632	0.986669	-0.00275	0.986632
79.5	0.492593	0.943587	0.986244	0.986247	-0.000186	0.986244
80.5	0.488691	0.94378	0.985691	0.985697	-0.000396	0.985691
81.5	0.485188	0.942518	0.984932	0.984933	-0.000107	0.984932
82.5	0.475746	0.940883	0.984584	0.984614	-0.001937	0.984584
83.5	0.467272	0.938624	0.984299	0.984321	-0.001376	0.984299
84.5	0.463545	0.937403	0.984358	0.984388	-0.001905	0.984358
85.5	0.457175	0.935941	0.984441	0.984399	0.002655	0.984441
86.5	0.450483	0.934992	0.984072	0.984027	0.002799	0.984072
87.5	0.448236	0.933164	0.983292	0.983234	0.003484	0.983292
88.5	0.432041	0.930527	0.982376	0.982263	0.006372	0.982376
89.5	0.42446	0.927911	0.981618	0.981548	0.003757	0.981618
90.5	0.410209	0.9252	0.980993	0.980855	0.007223	0.980993
91.5	0.398384	0.921036	0.980284	0.980095	0.009463	0.980284
92.5	0.388589	0.918147	0.97982	0.979586	0.011451	0.97982
93.5	0.385357	0.917997	0.979395	0.9792	0.009382	0.979395
94.5	0.380058	0.917223	0.978933	0.978746	0.008809	0.978933
95.5	0.366519	0.913524	0.977807	0.977651	0.006974	0.977807
96.5	0.350838	0.906966	0.976392	0.976206	0.007818	0.976392
97.5	0.33799	0.901232	0.975053	0.974666	0.015258	0.975053
98.5	0.328177	0.897332	0.973488	0.973116	0.013843	0.973488
99.5	0.314357	0.892871	0.971998	0.971814	0.006528	0.971998
100.5	0.311699	0.88804	0.970523	0.970476	0.001567	0.970523
101.5	0.295826	0.884094	0.969444	0.969319	0.004099	0.969444
102.5	0.292198	0.882281	0.969366	0.969117	0.008073	0.969366
103.5	0.282633	0.879289	0.968757	0.968414	0.010864	0.968757
104.5	0.277493	0.876723	0.96765	0.96735	0.009188	0.96765
105.5	0.262209	0.870174	0.965493	0.96536	0.003865	0.965493
106.5	0.245235	0.86273	0.963403	0.963449	-0.001261	0.963403
107.5	0.241733	0.858	0.961808	0.962002	-0.005104	0.961808
108.5	0.23918	0.853448	0.960694	0.960859	-0.004206	0.960694
109.5	0.228231	0.849354	0.959543	0.959453	0.002218	0.959543
110.5	0.213304	0.84244	0.957364	0.956695	0.015458	0.957364
111.5	0.20368	0.834933	0.954901	0.953659	0.026805	0.954901
112.5	0.200626	0.828171	0.952392	0.950475	0.038709	0.952392
113.5	0.187513	0.821613	0.949869	0.947221	0.050182	0.949869
114.5	0.181822	0.813292	0.947532	0.944414	0.056104	0.947532
115.5	0.176419	0.804309	0.945521	0.942213	0.057245	0.945521
116.5	0.1632	0.796865	0.943324	0.939801	0.058527	0.943324
117.5	0.162542	0.78882	0.940078	0.935017	0.077891	0.940078
118.5	0.153671	0.779392	0.936809	0.926833	0.136342	0.936809
119.5	0.146473	0.771419	0.934092	0.910227	0.265841	0.934092
120.5	0.145424	0.764441	0.931857	0.873312	0.46212	0.931857
121.5	0.136318	0.757188	0.930169	0.790231	0.667108	0.930169
122.5	0.130893	0.748961	0.927974	0.61363	0.813582	0.927974
123.5	0.13011	0.739958	0.924942	0.390102	0.876933	0.876933
124.5	0.121917	0.730094	0.920789	0.261611	0.892725	0.892725
125.5	0.117975	0.72277	0.917518	0.212993	0.895195	0.895195
126.5	0.108063	0.720666	0.915409	0.187871	0.895841	0.895841
127.5	0.109656	0.713063	0.91302	0.171995	0.894952	0.894952
128.5	0.102283	0.702016	0.908835	0.154929	0.892122	0.892122
129.5	0.10008	0.69183	0.9036	0.139291	0.888	0.888
130.5	0.091431	0.673971	0.899118	0.122334	0.885057	0.885057
131.5	0.090775	0.660644	0.894422	0.115559	0.880627	0.880627
132.5	0.083633	0.645109	0.886949	0.107761	0.873296	0.873296
133.5	0.075193	0.625857	0.877232	0.104491	0.862907	0.862907
134.5	0.068115	0.60624	0.866596	0.094523	0.85267	0.85267
135.5	0.063079	0.582327	0.85541	0.072624	0.844087	0.844087
136.5	0.056716	0.558799	0.846031	0.061841	0.835882	0.835882
137.5	0.054107	0.536235	0.834526	0.056841	0.824554	0.824554
138.5	0.046981	0.504139	0.821069	0.052743	0.811106	0.811106
139.5	0.036634	0.473495	0.802896	0.044013	0.793821	0.793821
140.5	0.039449	0.447132	0.782146	0.035969	0.774017	0.774017
141.5	0.031568	0.420622	0.759949	0.029929	0.752543	0.752543
142.5	0.028854	0.383914	0.733845	0.020794	0.728193	0.728193
143.5	0.025492	0.342006	0.70018	0.022754	0.693199	0.693199
144.5	0.017233	0.303293	0.667702	0.027018	0.658475	0.658475
145.5	0.016728	0.278461	0.638832	0.025267	0.629469	0.629469
146.5	0.017064	0.254	0.612952	0.018079	0.605825	0.605825
147.5	0.012939	0.228628	0.581229	0.017921	0.573587	0.573587
148.5	0.010113	0.207789	0.549869	0.026192	0.537762	0.537762
149.5	0.00954	0.190682	0.521371	0.023829	0.509687	0.509687
150.5	0.005972	0.172515	0.494487	0.020727	0.483788	0.483788
151.5	0.008184	0.154369	0.47107	0.013113	0.464042	0.464042
152.5	0.007036	0.134742	0.447715	0.013005	0.440438	0.440438
153.5	0.005285	0.126941	0.424642	0.015787	0.415413	0.415413
154.5	0.004277	0.118266	0.39829	0.015656	0.38872	0.38872
155.5	0.003829	0.114551	0.374835	0.009982	0.368532	0.368532
156.5	0.006955	0.109068	0.352104	0.004276	0.349322	0.349322
157.5	0.005801	0.095427	0.335407	0.004513	0.332394	0.332394
158.5	0.005449	0.082959	0.315851	0.006316	0.311502	0.311502
159.5	0.002404	0.081948	0.29777	0.004384	0.294679	0.294679
160.5	0.003116	0.083796	0.283468	-0.002576	0.285309	0.285309
161.5	0.004162	0.077037	0.270565	-0.00649	0.275268	0.275268
162.5	0.002903	0.069346	0.256769	-0.004391	0.260019	0.260019
163.5	0.002145	0.066879	0.249006	-0.001777	0.250338	0.250338
164.5	0.002242	0.064445	0.240513	0.001131	0.239654	0.239654
165.5	0.002505	0.05666	0.22451	0.003763	0.22158	0.22158
166.5	1.2e-05	0.051026	0.205316	0.001928	0.203781	0.203781
167.5	0.003542	0.044368	0.183299	-0.003673	0.186288	0.186288
168.5	0.003221	0.03802	0.162274	-0.007768	0.168732	0.168732
169.5	0.001906	0.030863	0.148884	-0.006225	0.154149	0.154149
170.5	7.4e-05	0.024075	0.14236	-0.001364	0.143528	0.143528
171.5	0.000416	0.02674	0.135392	0.00374	0.132146	0.132146
172.5	0.001609	0.027532	0.128931	0.00638	0.123339	0.123339
173.5	0.00339	0.023821	0.117692	0.012328	0.106679	0.106679
174.5	-0.001986	0.019106	0.106877	0.019012	0.089569	0.089569
175.5	0.003336	0.014984	0.093464	0.017864	0.076975	0.076975
176.5	0.003576	0.016948	0.081927	0.015596	0.067382	0.067382
177.5	-0.000152	0.018316	0.080988	0.013303	0.068597	0.068597
178.5	-0.000198	0.019963	0.085325	0.009027	0.076994	0.076994
179.5	0.002474	0.024282	0.08833	0.001707	0.08677	0.08677
180.5	-0.002032	0.017868	0.080348	-0.003234	0.083313	0.083313
181.5	0.002156	0.014027	0.0692	0.003982	0.065478	0.065478
182.5	-0.000954	0.010835	0.060212	0.015023	0.045878	0.045878
183.5	0.000178	0.004651	0.051887	0.02045	0.032093	0.032093
184.5	-0.002504	0.00508	0.047402	0.017186	0.030744	0.030744
185.5	0.001271	0.004861	0.043271	0.014425	0.029268	0.029268
186.5	0.001012	0.002226	0.040145	0.01557	0.024964	0.024964
187.5	-0.001706	0.005521	0.037699	0.012586	0.025434	0.025434
188.5	0.002155	0.004945	0.037509	0.007962	0.029784	0.029784
189.5	0.001117	0.004602	0.033588	0.004383	0.029334	0.029334
190.5	-0.003587	0.001533	0.027934	0.006085	0.021983	0.021983
191.5	-0.003547	0.00294	0.023016	0.011271	0.011879	0.011879
192.5	-0.000444	0.006586	0.022815	0.010551	0.012395	0.012395
193.5	0.00049	0.002507	0.01762	0.010099	0.007598	0.007598
194.5	-0.001056	0.001471	0.01656	0.007346	0.009282	0.009282
195.5	-0.000226	0.003682	0.020166	0.004177	0.016056	0.016056
196.5	0.003505	0.005778	0.018429	0.002717	0.015755	0.015755
197.5	-0.000887	0.006391	0.018255	0.000213	0.018046	0.018046
198.5	-0.002085	0.0048	0.016936	-0.006492	0.023277	0.023277
199.5	0.00072	0.001903	0.014282	-0.011135	0.025137	0.025137
200.5	0.001552	0.001764	0.009518	-0.011282	0.020568	0.020568
201.5	0.000436	-3e-06	0.0072	-0.004405	0.011554	0.011554
202.5	0.000522	-0.003868	0.008327	0.002426	0.005915	0.005915
203.5	-0.000262	7.9e-05	0.009588	0.009282	0.000309	0.000309
204.5	0.002188	0.003857	0.010295	0.014638	-0.004408	-0.004408
205.5	-0.000956	0.002327	0.008519	0.016803	-0.008425	-0.008425
206.5	0.001457	0.002803	0.007056	0.014653	-0.00771	-0.00771
207.5	0.001255	6.7e-05	0.003278	0.012599	-0.00944	-0.00944
208.5	0.000462	-0.002556	0.000758	0.008049	-0.00735	-0.00735
209.5	0.001027	-0.005193	2.1e-05	0.002132	-0.002116	-0.002116
210.5	-0.001444	-0.004041	0.001092	-0.000221	0.001313	0.001313
211.5	0.000664	-0.002601	0.002473	-0.000756	0.003227	0.003227
212.5	0.000641	0.003119	0.003536	0.000361	0.003176	0.003176
213.5	0.000728	0.005498	0.004962	0.002215	0.002753	0.002753
214.5	0.001138	0.00708	0.000529	0.000555	-2.6e-05	-2.6e-05
215.5	-0.002118	0.00413	-0.002608	-0.000133	-0.002475	-0.002475
216.5	0.000455	0.000555	-0.001974	-2.7e-05	-0.001947	-0.001947
217.5	-0.002387	0.0056	0.003081	0.002889	0.000192	0.000192
218.5	0.000765	0.008539	0.00887	0.00377	0.005119	0.005119
219.5	-0.001295	0.00313	0.009085	0.001656	0.007441	0.007441
220.5	0.000742	-0.000333	0.007147	0.002196	0.004962	0.004962
221.5	0.000931	-0.001206	0.004305	0.002232	0.002077	0.002077
222.5	0.000368	-0.000389	-0.000727	-0.001413	0.000685	0.000685
223.5	0.001599	0.001728	-0.002724	-0.001987	-0.000736	-0.000736
224.5	0.001146	0.002393	-0.00528	-0.001324	-0.003951	-0.003951
225.5	0.001001	-0.000964	-0.005229	0.003565	-0.008826	-0.008826
226.5	-0.000494	-0.00235	-0.003486	-0.000271	-0.003214	-0.003214
227.5	-0.001546	-0.003161	-0.001107	-0.006497	0.005355	0.005355
228.5	0.000921	-0.003066	-0.002154	-0.005497	0.003325	0.003325
229.5	-0.000548	-0.004654	-0.003518	-0.000454	-0.003062	-0.003062
230.5	-0.000579	-0.005416	-0.000491	0.000524	-0.001016	-0.001016
231.5	-0.000167	-0.003712	-0.003787	-0.003177	-0.000608	-0.000608
232.5	0.001455	-0.003674	-0.006591	-0.006515	-7.6e-05	-7.6e-05
233.5	0.000912	-0.002768	-0.010104	-0.004859	-0.00522	-0.00522
234.5	-0.000916	-0.001148	-0.008979	-0.004222	-0.004737	-0.004737
235.5	0.002011	0.001158	-0.006414	-0.002709	-0.003695	-0.003695
236.5	-0.000113	0.000397	-0.004462	-0.004207	-0.000254	-0.000254
237.5	-0.001633	0.000684	-0.001584	-0.006917	0.005297	0.005297
238.5	-0.000981	0.000153	0.003976	-0.007152	0.011049	0.011049
239.5	-0.001775	-0.002428	0.004314	-0.004766	0.009037	0.009037
240.5	0.000713	-0.002205	0.002163	-0.00313	0.005276	0.005276
241.5	-0.000751	0.002318	-0.001333	-0.003494	0.002154	0.002154
242.5	-0.000491	0.000473	-0.002563	-0.004429	0.001857	0.001857
243.5	0.00067	-0.003778	-0.004412	-0.003471	-0.000938	-0.000938
244.5	0.002762	-0.001835	-0.006981	-0.004553	-0.002417	-0.002417
245.5	0.001802	0.002252	-0.002144	-0.005362	0.0032	0.0032
246.5	0.00105	0.003495	0.001948	-0.003603	0.005532	0.005532
247.5	-8.2e-05	0.004076	0.005889	-0.000145	0.006033	0.006033
248.5	0.000633	0.005247	0.004239	-0.001459	0.005689	0.005689
249.5	0.000914	0.002144	0.000175	-0.003365	0.003528	0.003528
250.5	0.001021	-2.9e-05	-0.003954	-0.00142	-0.00253	-0.00253
251.5	0.001695	-0.000249	-0.006322	-0.003549	-0.002764	-0.002764
252.5	0.001885	0.001166	-0.005465	-0.004515	-0.000946	-0.000946
253.5	0.000252	0.003104	-0.004273	-0.001287	-0.002982	-0.002982

## Sheet: SF_Empty_30s_head
wave_number	fsc_nomask	fsc_loosemask	fsc_tightmask	fsc_noisesub_raw	fsc_noisesub_true	fsc_noisesub
0.5	1	1	1	1	nan	1
1.5	0.99996	0.999999	1	1	0	1
2.5	0.999927	0.999995	1	1	-0.75	1
3.5	0.999817	0.999987	0.999999	0.999999	0.307692	0.999999
4.5	0.999643	0.999973	0.999998	0.999998	-0.096774	0.999998
5.5	0.999355	0.999943	0.999994	0.999994	0.074074	0.999994
6.5	0.998555	0.999908	0.999975	0.999976	-0.044118	0.999975
7.5	0.997859	0.999884	0.999961	0.999962	-0.039494	0.999961
8.5	0.996396	0.999867	0.999959	0.99996	-0.028571	0.999959
9.5	0.996212	0.999829	0.999938	0.999941	-0.055499	0.999938
10.5	0.995751	0.999752	0.999894	0.999899	-0.048435	0.999894
11.5	0.994	0.999648	0.999838	0.999844	-0.040551	0.999838
12.5	0.9931	0.999587	0.99983	0.999832	-0.011001	0.99983
13.5	0.992105	0.999508	0.99983	0.999828	0.010753	0.99983
14.5	0.991599	0.999427	0.999822	0.999816	0.029812	0.999822
15.5	0.990242	0.999357	0.999811	0.999807	0.018553	0.999811
16.5	0.987627	0.999281	0.999809	0.999808	0.004344	0.999809
17.5	0.984348	0.999207	0.999815	0.999819	-0.022675	0.999815
18.5	0.97695	0.999079	0.999784	0.999793	-0.039667	0.999784
19.5	0.968094	0.998652	0.999701	0.999711	-0.035722	0.999701
20.5	0.950442	0.997823	0.999541	0.999555	-0.03051	0.999541
21.5	0.934724	0.996996	0.999304	0.999323	-0.028458	0.999304
22.5	0.926621	0.99624	0.999101	0.999118	-0.020007	0.999101
23.5	0.924101	0.995587	0.998927	0.998952	-0.023665	0.998927
24.5	0.899885	0.995106	0.998714	0.998735	-0.016637	0.998714
25.5	0.888301	0.994417	0.998551	0.998571	-0.013551	0.998551
26.5	0.889254	0.99383	0.998441	0.998454	-0.008443	0.998441
27.5	0.882133	0.993268	0.998494	0.9985	-0.004332	0.998494
28.5	0.879604	0.993076	0.9985	0.998513	-0.008776	0.9985
29.5	0.866688	0.993305	0.998508	0.998534	-0.017685	0.998508
30.5	0.853428	0.993406	0.998452	0.998488	-0.023972	0.998452
31.5	0.840173	0.993164	0.998365	0.998393	-0.017734	0.998365
32.5	0.828776	0.992531	0.99825	0.998262	-0.006446	0.99825
33.5	0.828	0.991364	0.998079	0.99809	-0.005555	0.998079
34.5	0.827265	0.990737	0.997907	0.997941	-0.016528	0.997907
35.5	0.805055	0.990187	0.997781	0.997837	-0.025569	0.997781
36.5	0.782356	0.989925	0.997661	0.997729	-0.030111	0.997661
37.5	0.77454	0.988759	0.997518	0.997575	-0.023524	0.997518
38.5	0.750689	0.987536	0.997294	0.997335	-0.01534	0.997294
39.5	0.734799	0.98685	0.997077	0.997092	-0.005309	0.997077
40.5	0.738754	0.986168	0.996848	0.996843	0.001586	0.996848
41.5	0.72404	0.985602	0.996629	0.996617	0.003559	0.996629
42.5	0.700635	0.984804	0.99628	0.996284	-0.000978	0.99628
43.5	0.672953	0.982994	0.99577	0.995783	-0.003039	0.99577
44.5	0.649761	0.980347	0.995191	0.995224	-0.006914	0.995191
45.5	0.635218	0.978064	0.994902	0.99496	-0.011484	0.994902
46.5	0.609761	0.97665	0.994698	0.994757	-0.01122	0.994698
47.5	0.593005	0.976046	0.994682	0.994727	-0.008432	0.994682
48.5	0.587108	0.975607	0.994421	0.994442	-0.003807	0.994421
49.5	0.569139	0.973589	0.993921	0.993938	-0.002881	0.993921
50.5	0.548328	0.971506	0.993256	0.993289	-0.004974	0.993256
51.5	0.539061	0.970004	0.992576	0.992659	-0.011278	0.992576
52.5	0.530718	0.968981	0.992076	0.992201	-0.015957	0.992076
53.5	0.505962	0.967331	0.991688	0.991812	-0.015244	0.991688
54.5	0.49921	0.966758	0.991655	0.991738	-0.010086	0.991655
55.5	0.489875	0.967036	0.99154	0.991589	-0.005833	0.99154
56.5	0.484357	0.96669	0.991444	0.991498	-0.006344	0.991444
57.5	0.47013	0.963726	0.990872	0.990962	-0.009952	0.990872
58.5	0.448305	0.959683	0.990159	0.990305	-0.015075	0.990159
59.5	0.433834	0.956274	0.989217	0.98941	-0.018247	0.989217
60.5	0.427874	0.954783	0.988354	0.98851	-0.013592	0.988354
61.5	0.416078	0.953329	0.987681	0.987782	-0.008264	0.987681
62.5	0.395355	0.951333	0.986988	0.986955	0.00255	0.986988
63.5	0.385453	0.950111	0.986608	0.986481	0.009395	0.986608
64.5	0.376528	0.949496	0.986211	0.986083	0.009178	0.986211
65.5	0.374508	0.948583	0.985856	0.985769	0.006107	0.985856
66.5	0.370331	0.946691	0.985518	0.985529	-0.000741	0.985518
67.5	0.354252	0.944492	0.985159	0.985218	-0.004016	0.985159
68.5	0.350563	0.941429	0.984683	0.984838	-0.010194	0.984683
69.5	0.338275	0.939567	0.984223	0.984401	-0.011467	0.984223
70.5	0.336014	0.938799	0.983653	0.983858	-0.012698	0.983653
71.5	0.324609	0.937184	0.983234	0.983378	-0.008685	0.983234
72.5	0.323837	0.935896	0.982791	0.982866	-0.004397	0.982791
73.5	0.314612	0.935235	0.982755	0.982776	-0.001222	0.982755
74.5	0.318001	0.935946	0.982825	0.982889	-0.003748	0.982825
75.5	0.320604	0.936532	0.98301	0.983136	-0.007433	0.98301
76.5	0.321563	0.937686	0.983164	0.983248	-0.005003	0.983164
77.5	0.322761	0.938341	0.983026	0.983007	0.001105	0.983026
78.5	0.308522	0.936708	0.982632	0.982529	0.005868	0.982632
79.5	0.3041	0.934079	0.98189	0.981817	0.004048	0.98189
80.5	0.296777	0.931116	0.980846	0.980901	-0.002915	0.980846
81.5	0.290277	0.928612	0.980137	0.980292	-0.007888	0.980137
82.5	0.28325	0.92667	0.979523	0.979673	-0.007381	0.979523
83.5	0.28697	0.926078	0.979344	0.979448	-0.005087	0.979344
84.5	0.28362	0.926646	0.979166	0.979323	-0.007633	0.979166
85.5	0.286387	0.926651	0.978959	0.979241	-0.013593	0.978959
86.5	0.280268	0.925064	0.978709	0.979056	-0.016583	0.978709
87.5	0.272757	0.922086	0.97856	0.978849	-0.013665	0.97856
88.5	0.270439	0.920568	0.978541	0.978724	-0.008606	0.978541
89.5	0.257433	0.918991	0.978393	0.978398	-0.000199	0.978393
90.5	0.257539	0.917482	0.977766	0.977759	0.000306	0.977766
91.5	0.249887	0.915252	0.976631	0.976655	-0.001026	0.976631
92.5	0.245742	0.914225	0.975527	0.975539	-0.000473	0.975527
93.5	0.23717	0.911691	0.974332	0.974196	0.005241	0.974332
94.5	0.232693	0.907719	0.973442	0.973186	0.009541	0.973442
95.5	0.222593	0.904038	0.972617	0.972187	0.015479	0.972617
96.5	0.218402	0.900237	0.971504	0.970947	0.019178	0.971504
97.5	0.207653	0.895467	0.969866	0.969252	0.019965	0.969866
98.5	0.197296	0.889903	0.96817	0.967438	0.022466	0.96817
99.5	0.187925	0.885114	0.966489	0.965495	0.028805	0.966489
100.5	0.177843	0.880404	0.965079	0.963496	0.043355	0.965079
101.5	0.170492	0.875606	0.963902	0.961062	0.072931	0.963902
102.5	0.161814	0.867707	0.961815	0.955612	0.139742	0.961815
103.5	0.15112	0.859709	0.9595	0.94518	0.261208	0.9595
104.5	0.143951	0.852379	0.957063	0.922931	0.442874	0.957063
105.5	0.132823	0.846649	0.95602	0.875188	0.647628	0.95602
106.5	0.136041	0.841361	0.954897	0.770879	0.803148	0.954897
107.5	0.130415	0.837942	0.954372	0.593759	0.887682	0.887682
108.5	0.124652	0.834293	0.952667	0.425437	0.91762	0.91762
109.5	0.121988	0.828416	0.950383	0.352188	0.923409	0.923409
110.5	0.119741	0.821292	0.947796	0.310949	0.924238	0.924238
111.5	0.119549	0.814645	0.945432	0.266182	0.925639	0.925639
112.5	0.105592	0.804696	0.942411	0.224125	0.925776	0.925776
113.5	0.098941	0.791301	0.938617	0.194511	0.923794	0.923794
114.5	0.092828	0.777331	0.934102	0.175625	0.920063	0.920063
115.5	0.083102	0.763623	0.929527	0.156657	0.916436	0.916436
116.5	0.080118	0.758189	0.926636	0.136106	0.915077	0.915077
117.5	0.074172	0.753548	0.92472	0.113902	0.915043	0.915043
118.5	0.07379	0.748511	0.922977	0.091026	0.915264	0.915264
119.5	0.072051	0.740813	0.920618	0.073122	0.914355	0.914355
120.5	0.070366	0.733604	0.917826	0.058698	0.912702	0.912702
121.5	0.066533	0.726696	0.914548	0.057816	0.909305	0.909305
122.5	0.062004	0.717631	0.911461	0.058345	0.905976	0.905976
123.5	0.06674	0.709904	0.908491	0.063472	0.902289	0.902289
124.5	0.06165	0.707228	0.90618	0.062199	0.899957	0.899957
125.5	0.058848	0.698657	0.902305	0.065885	0.895415	0.895415
126.5	0.052626	0.684388	0.897494	0.063535	0.890539	0.890539
127.5	0.052706	0.667482	0.891261	0.057149	0.88467	0.88467
128.5	0.047579	0.650902	0.88512	0.045851	0.879599	0.879599
129.5	0.040474	0.635839	0.879217	0.040199	0.874158	0.874158
130.5	0.038354	0.623558	0.871692	0.032852	0.867334	0.867334
131.5	0.041604	0.610214	0.863916	0.033529	0.859195	0.859195
132.5	0.035031	0.586432	0.853714	0.033338	0.848669	0.848669
133.5	0.037948	0.560646	0.84343	0.03749	0.837332	0.837332
134.5	0.026965	0.537538	0.834113	0.038143	0.827535	0.827535
135.5	0.027214	0.514742	0.821939	0.038091	0.814888	0.814888
136.5	0.025934	0.489346	0.808025	0.031781	0.801723	0.801723
137.5	0.021584	0.454484	0.788254	0.02887	0.781959	0.781959
138.5	0.01501	0.420407	0.768606	0.022763	0.763216	0.763216
139.5	0.016027	0.387769	0.744979	0.017009	0.740566	0.740566
140.5	0.013158	0.358096	0.720559	0.009791	0.717795	0.717795
141.5	0.0109	0.328206	0.694	0.002605	0.693201	0.693201
142.5	0.014843	0.300924	0.664503	-0.004115	0.665878	0.665878
143.5	0.008179	0.277201	0.637753	-0.003566	0.63904	0.63904
144.5	0.0091	0.254315	0.613546	-0.000289	0.613657	0.613657
145.5	0.004677	0.233421	0.590215	0.002874	0.589034	0.589034
146.5	0.004518	0.213249	0.564538	0.004078	0.562754	0.562754
147.5	0.007283	0.194483	0.535937	0.007279	0.532534	0.532534
148.5	0.00144	0.181653	0.509668	0.006796	0.506313	0.506313
149.5	0.005248	0.165333	0.483894	0.004946	0.481329	0.481329
150.5	0.007163	0.152048	0.461775	0.005222	0.45895	0.45895
151.5	0.005121	0.143361	0.438203	0.008682	0.433283	0.433283
152.5	0.004506	0.133903	0.419878	0.010281	0.413851	0.413851
153.5	0.004503	0.11918	0.399596	0.01828	0.388417	0.388417
154.5	0.006838	0.109461	0.377035	0.014371	0.367952	0.367952
155.5	0.004139	0.102641	0.352297	0.008109	0.347002	0.347002
156.5	0.004396	0.097562	0.326872	0.002118	0.325443	0.325443
157.5	0.004523	0.086292	0.305051	-0.001084	0.305804	0.305804
158.5	0.000833	0.078297	0.288478	-9.9e-05	0.288548	0.288548
159.5	-0.000479	0.071598	0.271149	-0.004517	0.274427	0.274427
160.5	0.00169	0.063612	0.255188	-0.012359	0.264281	0.264281
161.5	-0.002314	0.05752	0.239498	-0.016933	0.252161	0.252161
162.5	-0.000513	0.049523	0.225961	-0.018057	0.23969	0.23969
163.5	0.000713	0.042595	0.210809	-0.010761	0.219211	0.219211
164.5	5e-05	0.035902	0.192248	-0.00637	0.19736	0.19736
165.5	-0.001129	0.029585	0.172464	-0.005369	0.176883	0.176883
166.5	-0.002788	0.033841	0.158122	-0.008705	0.165387	0.165387
167.5	-0.00106	0.038435	0.145948	-0.013011	0.156917	0.156917
168.5	-0.000242	0.034972	0.138799	-0.011833	0.148871	0.148871
169.5	-0.003364	0.02326	0.131784	-0.009042	0.139564	0.139564
170.5	-0.003228	0.016164	0.125744	-0.005135	0.13021	0.13021
171.5	-0.003674	0.016401	0.119674	-0.001637	0.121113	0.121113
172.5	-0.002449	0.025307	0.115211	0.002059	0.113386	0.113386
173.5	-0.001019	0.028942	0.111038	0.005652	0.105985	0.105985
174.5	0.001228	0.023413	0.104491	0.008955	0.096399	0.096399
175.5	0.001122	0.012517	0.094681	0.006951	0.088345	0.088345
176.5	0.001348	0.00427	0.078626	0.002018	0.076763	0.076763
177.5	-0.000414	0.002025	0.066101	-0.0025	0.06843	0.06843
178.5	0.001061	0.006353	0.061674	-0.004585	0.065956	0.065956
179.5	-0.000365	0.01269	0.06506	-0.00506	0.069767	0.069767
180.5	0.002359	0.019171	0.071725	-0.007257	0.078413	0.078413
181.5	-0.00116	0.015274	0.069031	-0.006255	0.074817	0.074817
182.5	0.000979	0.004023	0.062496	-0.005816	0.067917	0.067917
183.5	0.003018	-0.001189	0.050326	0.002994	0.047474	0.047474
184.5	0.00139	0.002298	0.038291	0.007836	0.030696	0.030696
185.5	-0.00162	0.008233	0.031414	0.005724	0.025838	0.025838
186.5	0.000167	0.009655	0.022272	-0.001362	0.023602	0.023602
187.5	-0.000115	0.006338	0.023638	-0.00436	0.027876	0.027876
188.5	0.001811	0.000651	0.022409	-0.000171	0.022577	0.022577
189.5	0.000212	-0.00026	0.023664	0.007036	0.016745	0.016745
190.5	-0.002211	-0.002872	0.02169	0.007994	0.013806	0.013806
191.5	0.000685	-0.005181	0.019064	0.004907	0.014227	0.014227
192.5	0.000862	0.001661	0.019268	-0.00306	0.022259	0.022259
193.5	-0.001849	0.005006	0.019581	-0.008351	0.0277	0.0277
194.5	-0.001623	0.002015	0.020814	-0.008972	0.029521	0.029521
195.5	0.000321	0.002316	0.018998	-0.013942	0.032487	0.032487
196.5	-0.000443	0.003598	0.016878	-0.014766	0.031183	0.031183
197.5	-0.00252	0.005688	0.014053	-0.012038	0.025781	0.025781
198.5	-0.001939	0.0066	0.014923	-0.0055	0.020312	0.020312
199.5	0.001328	0.006316	0.014738	0.000535	0.01421	0.01421
200.5	-0.001834	0.008577	0.013859	0.003496	0.010399	0.010399
201.5	-0.000277	0.009218	0.01308	0.006622	0.006501	0.006501
202.5	0.000303	0.005017	0.010247	0.005349	0.004925	0.004925
203.5	-0.001057	0.002408	0.009126	0.004709	0.004438	0.004438
204.5	-0.000794	-0.002578	0.003186	0.000218	0.002969	0.002969
205.5	-0.00274	-0.002051	-0.002008	-0.003619	0.001606	0.001606
206.5	-0.001717	-0.00313	-0.009396	-0.00947	7.4e-05	7.4e-05
207.5	-0.001853	0.001062	-0.011791	-0.013138	0.001329	0.001329
208.5	-0.001096	0.004717	-0.010252	-0.01501	0.004688	0.004688
209.5	0.000239	0.004077	-0.005744	-0.012789	0.006956	0.006956
210.5	-0.000284	0.003617	-0.003413	-0.008049	0.004598	0.004598
211.5	-0.002737	0.002535	-0.003963	-0.006075	0.0021	0.0021
212.5	-0.000389	-0.007438	-0.005554	-0.003645	-0.001903	-0.001903
213.5	-0.002054	-0.009109	-0.00408	-0.005343	0.001256	0.001256
214.5	-0.000678	-0.005078	-0.001669	-0.004254	0.002574	0.002574
215.5	0.001448	0.001229	-0.002894	-0.004194	0.001295	0.001295
216.5	0.001265	0.00337	-0.003111	-0.001846	-0.001263	-0.001263
217.5	0.000135	0.00663	-0.00528	-0.001681	-0.003593	-0.003593
218.5	0.000242	0.002239	-0.004801	-0.00205	-0.002745	-0.002745
219.5	0.000917	-0.00194	-4.5e-05	-0.002503	0.002451	0.002451
220.5	0.001741	-0.002468	0.003656	-0.004521	0.008141	0.008141
221.5	0.000974	0.000399	0.003744	-0.004982	0.008683	0.008683
222.5	0.002495	0.001147	0.004581	-0.005849	0.010369	0.010369
223.5	0.001991	-0.001588	0.001973	-0.007201	0.009108	0.009108
224.5	-0.00122	-0.001982	0.004577	-0.008719	0.013181	0.013181
225.5	-0.00042	0.00121	0.007604	-0.00973	0.017166	0.017166
226.5	0.00176	0.003422	0.00956	-0.009091	0.018483	0.018483
227.5	0.00223	0.004118	0.008029	-0.005591	0.013544	0.013544
228.5	-0.001288	0.001104	0.000156	-0.004002	0.004141	0.004141
229.5	-0.000105	-0.004753	-0.00865	-0.004154	-0.004477	-0.004477
230.5	0.000988	-0.006438	-0.015047	-0.006297	-0.008695	-0.008695
231.5	-0.000342	-0.002506	-0.015467	-0.005422	-0.009991	-0.009991
232.5	0.000113	-0.002245	-0.011906	-0.000568	-0.011332	-0.011332
233.5	-0.000914	-0.004444	-0.004215	0.004988	-0.00925	-0.00925
234.5	-0.002883	-0.004636	-0.000736	0.006189	-0.006968	-0.006968
235.5	0.003568	-0.002463	0.001091	0.005172	-0.004103	-0.004103
236.5	0.000109	0.001138	0.004149	0.00197	0.002183	0.002183
237.5	0.001997	0.002511	0.00447	0.003788	0.000685	0.000685
238.5	-3.5e-05	0.001203	0.006043	0.004771	0.001278	0.001278
239.5	0.000882	-0.000887	0.006774	0.002124	0.00466	0.00466
240.5	0.000637	-0.003513	0.004527	-0.001749	0.006266	0.006266
241.5	-0.000672	-0.005168	0.002574	-0.007958	0.010449	0.010449
242.5	0.000507	-0.004452	0.001005	-0.009891	0.010789	0.010789
243.5	-0.000305	0.000414	-0.000768	-0.011961	0.011061	0.011061
244.5	-0.000475	0.001785	-0.003352	-0.012138	0.008681	0.008681
245.5	0.001743	0.001441	-0.00379	-0.011259	0.007386	0.007386
246.5	-0.000525	0.001642	-0.004753	-0.00812	0.003339	0.003339
247.5	-0.002796	0.006732	-0.003656	-0.003079	-0.000576	-0.000576
248.5	0.001918	0.007453	-0.001336	0.002579	-0.003925	-0.003925
249.5	0.002371	0.005313	0.001382	0.007051	-0.005709	-0.005709
250.5	-0.000969	0.006135	-0.000642	0.006177	-0.006862	-0.006862
251.5	0.001484	0.006525	-0.000797	-0.000264	-0.000533	-0.000533
252.5	-0.000546	0.004915	-0.003391	-0.004743	0.001346	0.001346
253.5	-3.7e-05	0.002182	-0.004248	-0.008654	0.004368	0.004368
